# Supplementary material (part 1 of 4)
Source: ML conference proceedings conference paper supplement (https://openreview.net/forum?id=STUGfUz8ob)

$W_K W_Q^T$  in Layer 1, Head 2 of GPT-2

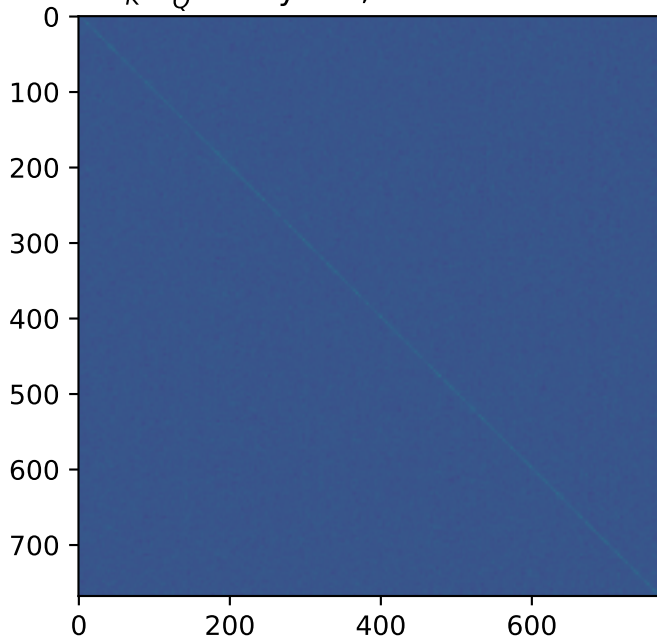

Supplement: supplementary_material [file attachment]

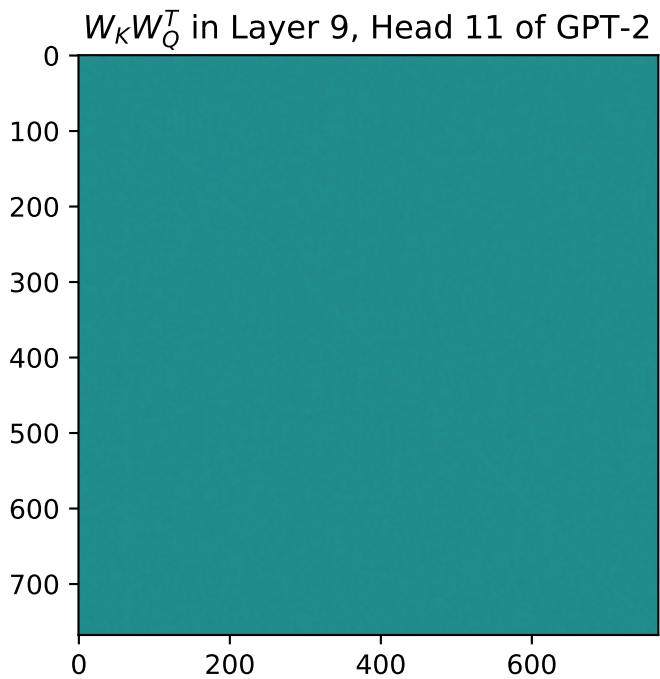

Supplement: supplementary_material [file attachment]

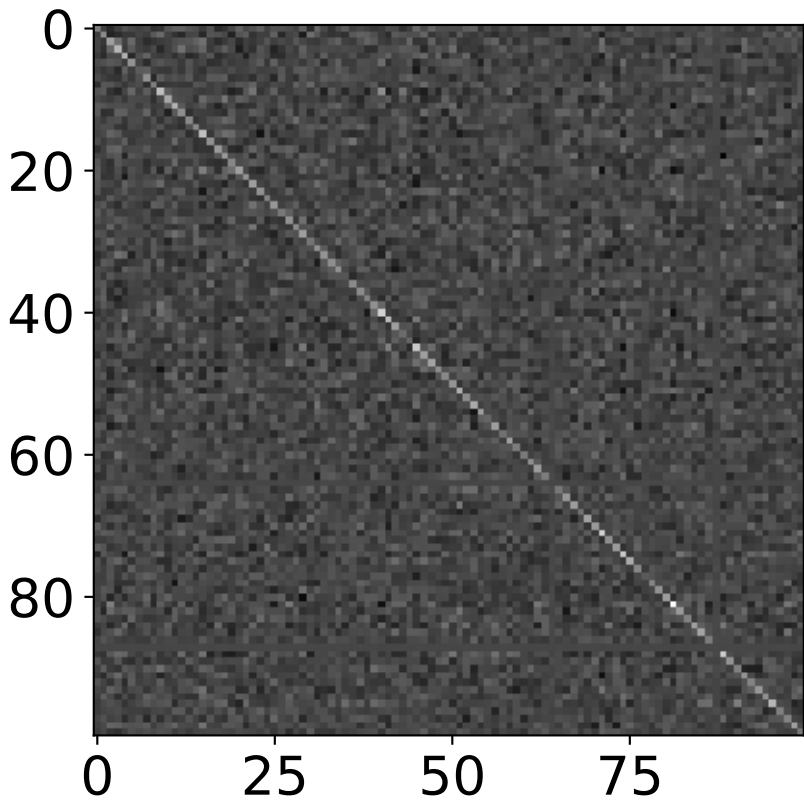

Supplement: supplementary_material [file attachment]

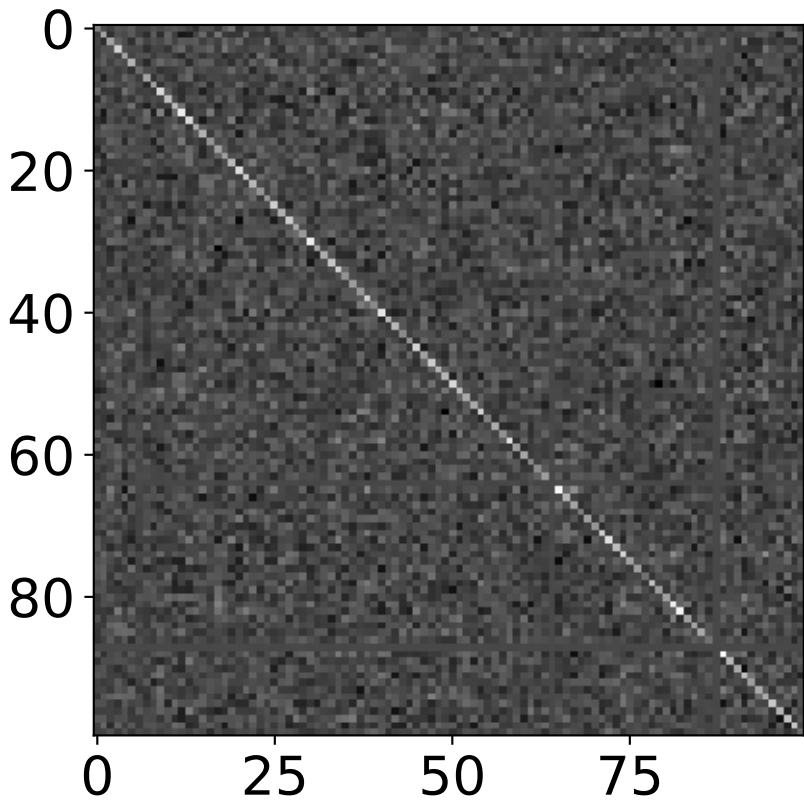

Supplement: supplementary_material [file attachment]

$W_V W_O^T$  in Layer 3, Head 8 of GPT-2

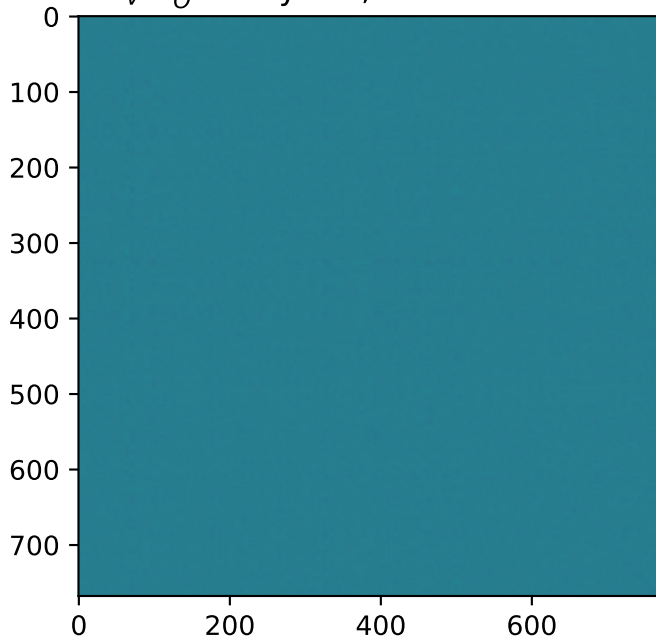

Supplement: supplementary_material [file attachment]

$W_V W_O^T$  in Layer 5, Head 9 of GPT-2

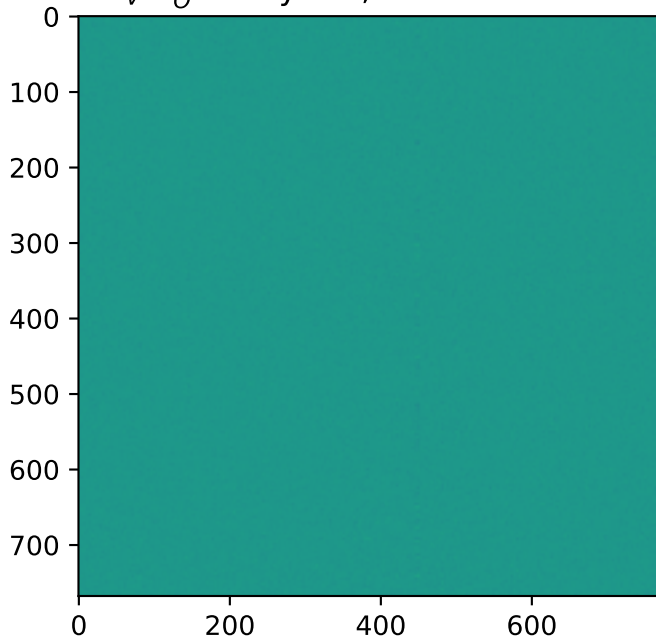

Supplement: supplementary_material [file attachment]

$W_K W_Q^T$  in Layer 7, Head 10 of GPT-2

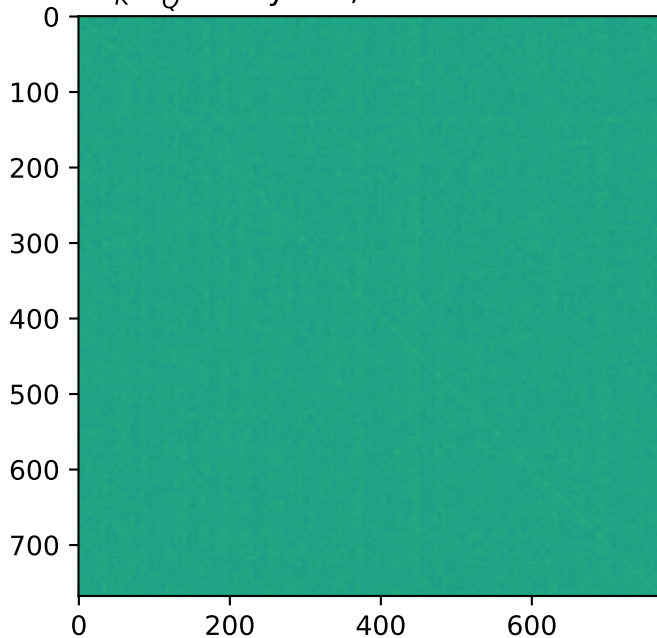

Supplement: supplementary_material [file attachment]

$W_V W_O^T$  in Layer 7, Head 12 of GPT-2

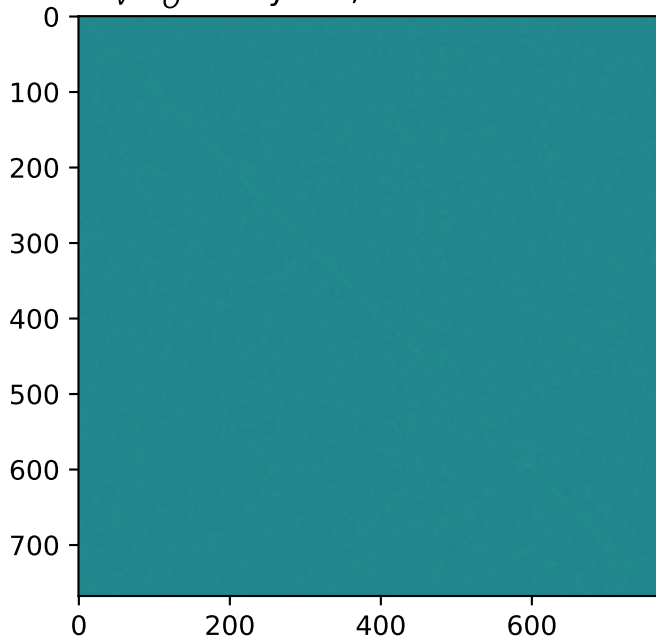

Supplement: supplementary_material [file attachment]

$W_V W_O^T$  in Layer 9, Head 7 of GPT-2

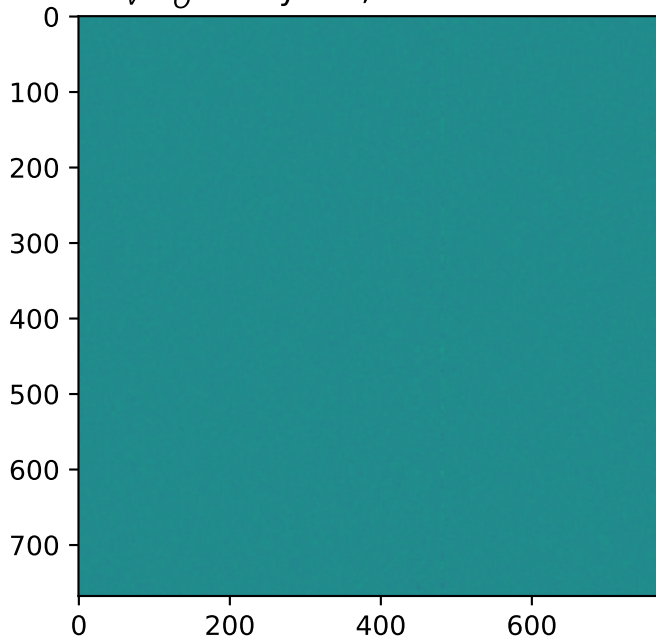

Supplement: supplementary_material [file attachment]

$W_V W_O^T$  in Layer 5, Head 3 of GPT-2

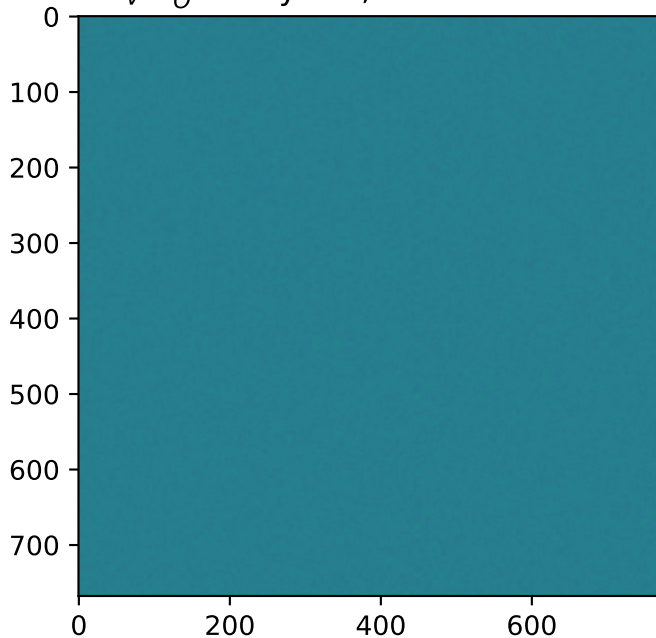

Supplement: supplementary_material [file attachment]

$W_K W_Q^T$  in Layer 3, Head 1 of GPT-2

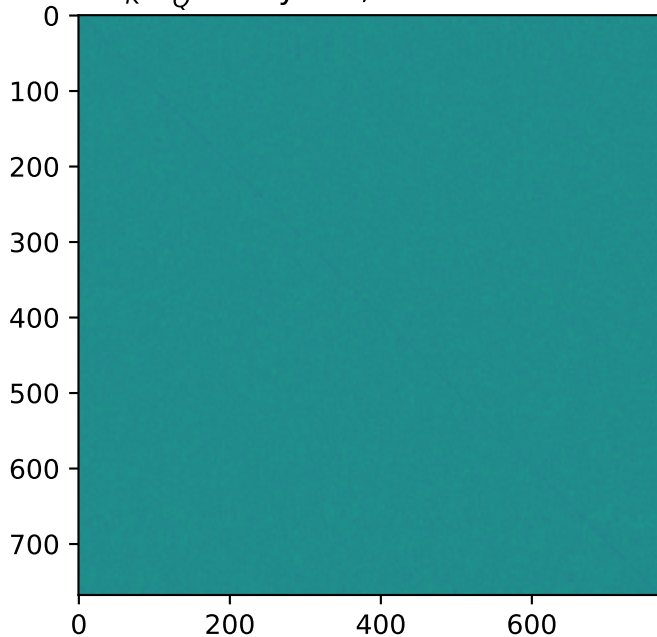

Supplement: supplementary_material [file attachment]

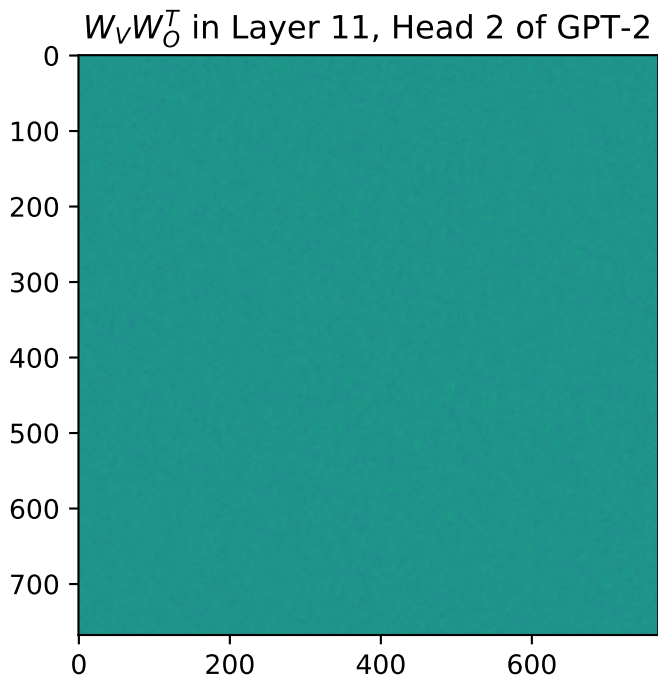

Supplement: supplementary_material [file attachment]

$W_K W_Q^T$  in Layer 11, Head 5 of GPT-2

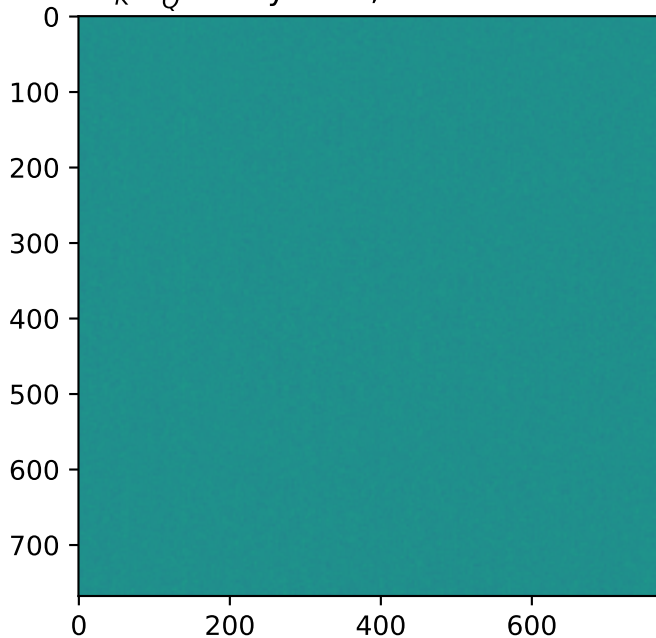

Supplement: supplementary_material [file attachment]

Transformer train loss on random tasks with different regular alphabet sizes

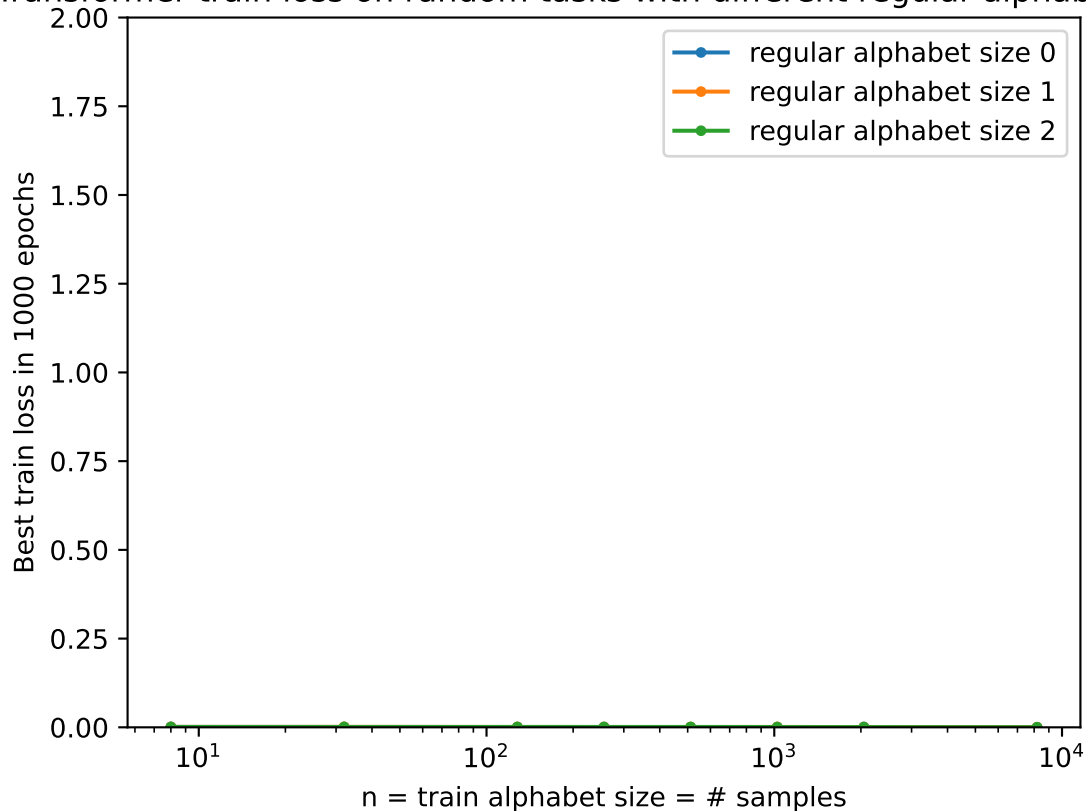

Supplement: supplementary_material [file attachment]

Transformer train loss vs. learning rate and number of heads, at  $n = 1024$

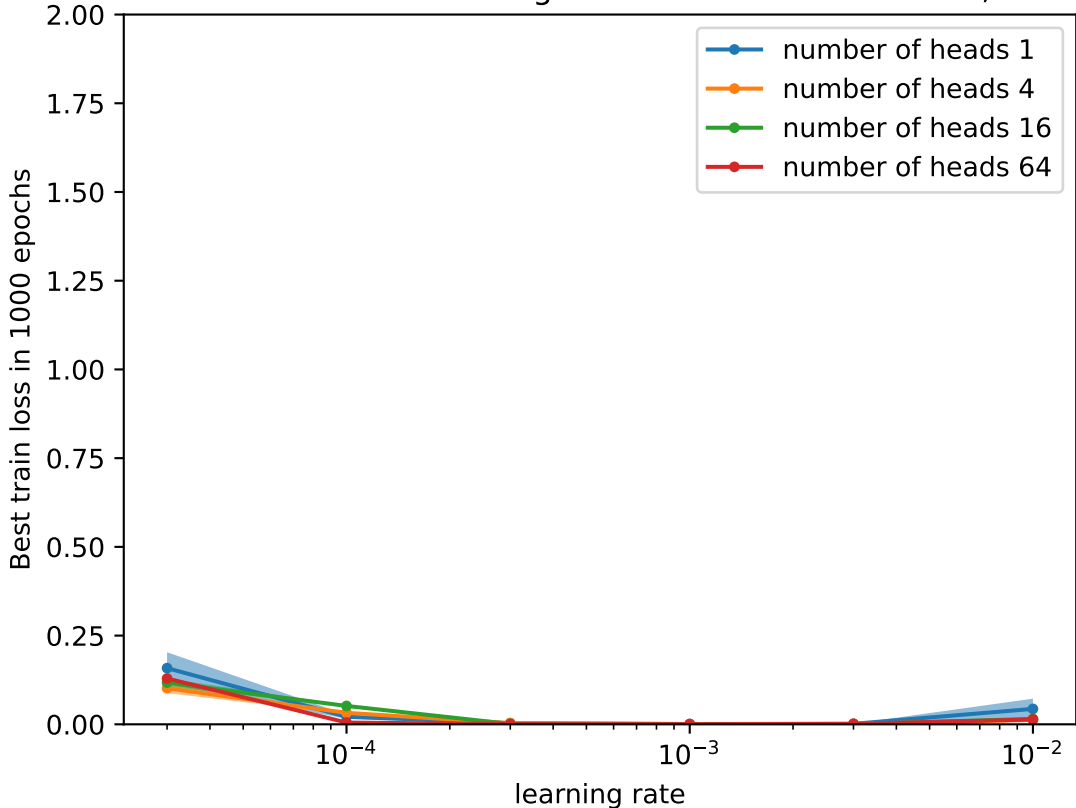

Supplement: supplementary_material [file attachment]

$W_V W_O^T$  in Layer 10, Head 10 of GPT-2

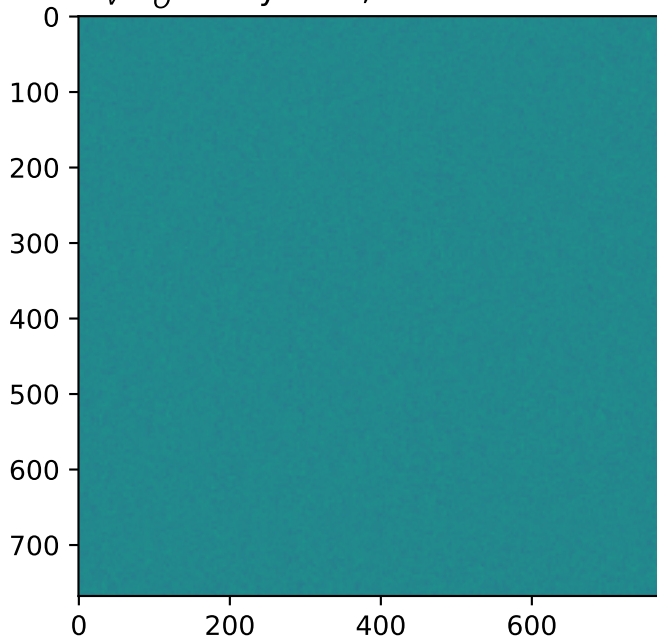

Supplement: supplementary_material [file attachment]

$W_K W_Q^T$  in Layer 2, Head 11 of GPT-2

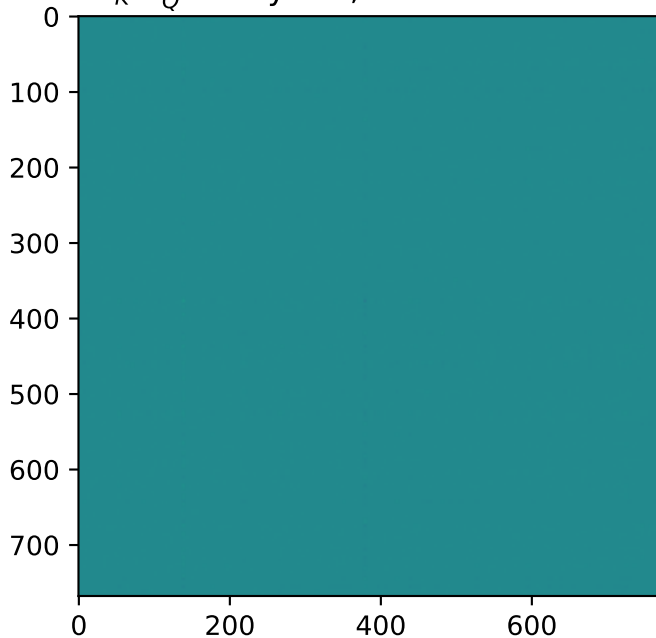

Supplement: supplementary_material [file attachment]

$W_K W_Q^T$  in Layer 3, Head 6 of GPT-2

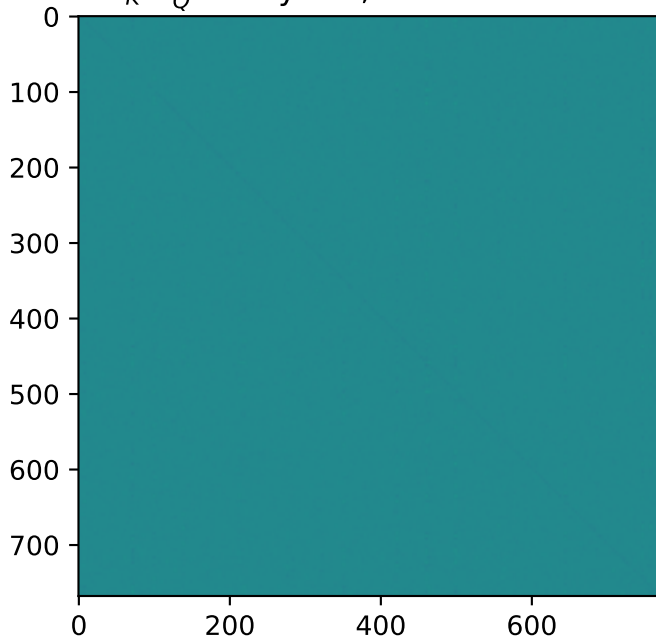

Supplement: supplementary_material [file attachment]

$W_V W_O^T$  in Layer 6, Head 9 of GPT-2

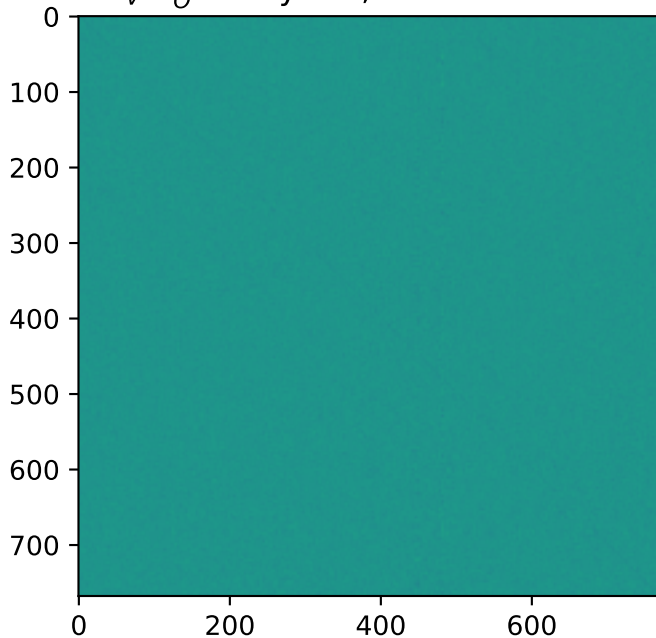

Supplement: supplementary_material [file attachment]

$W_K W_Q^T$  in Layer 4, Head 1 of GPT-2

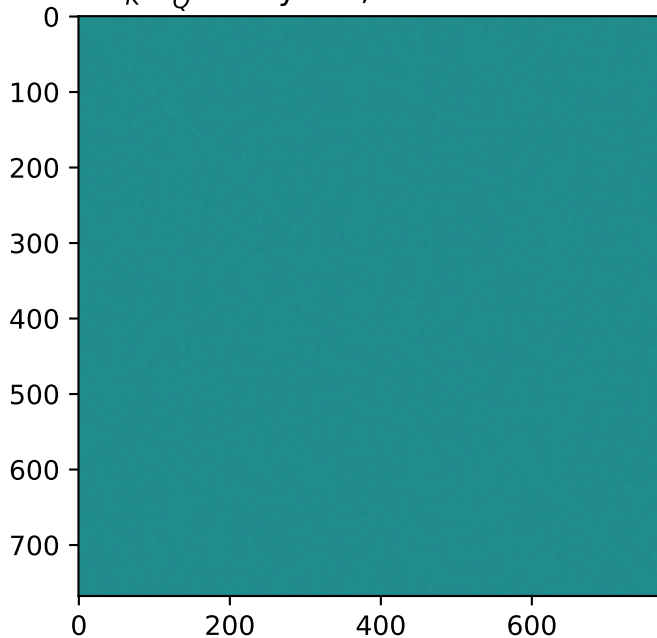

Supplement: supplementary_material [file attachment]

$W_V W_O^T$  in Layer 11, Head 11 of GPT-2

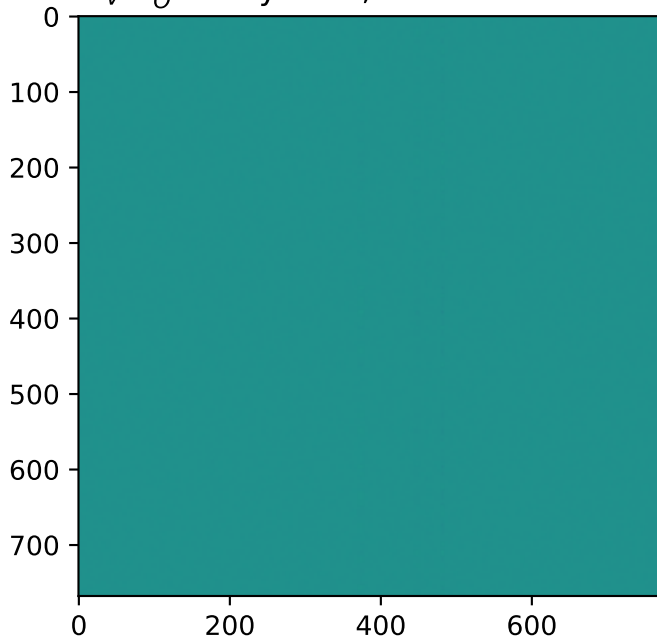

Supplement: supplementary_material [file attachment]

Transformer train loss vs. learning rate and number of heads, at  $n = 512$

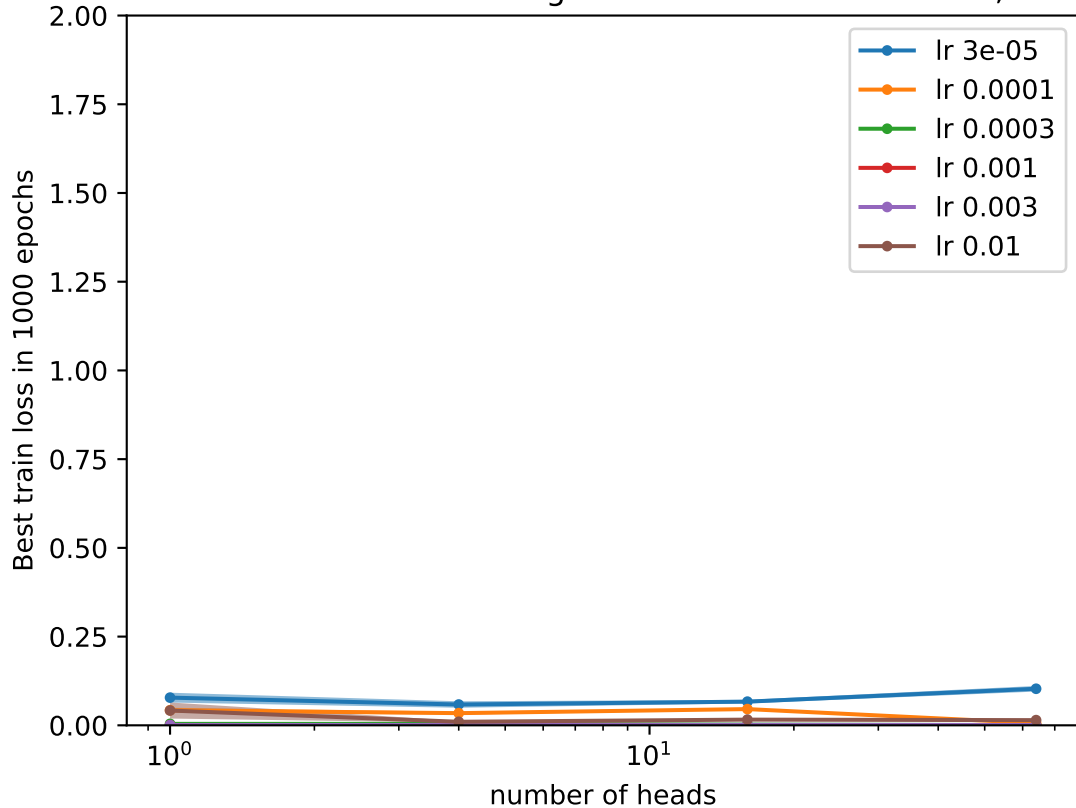

Supplement: supplementary_material [file attachment]

$W_K W_Q^T$  in Layer 8, Head 11 of GPT-2

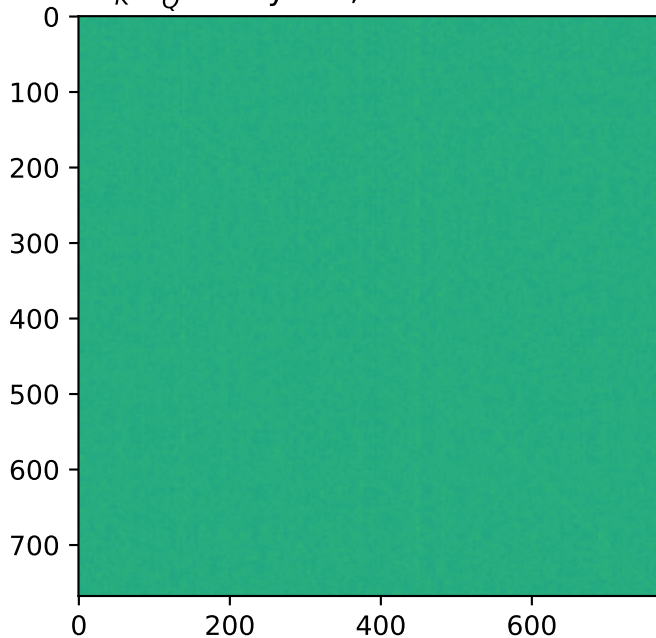

Supplement: supplementary_material [file attachment]

MLP vs. MLP with  $XX^T$  data augmentation, test loss

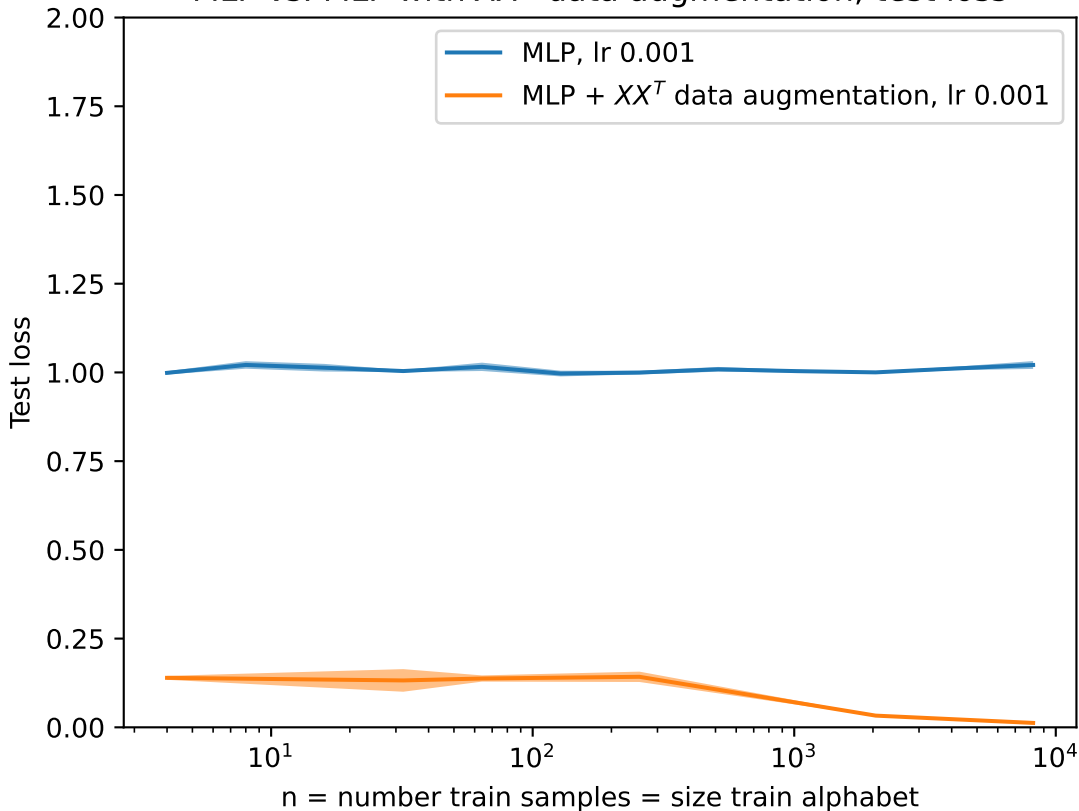

Supplement: supplementary_material [file attachment]

Transformer test loss vs. learning rate and depth, at  $n = 512$

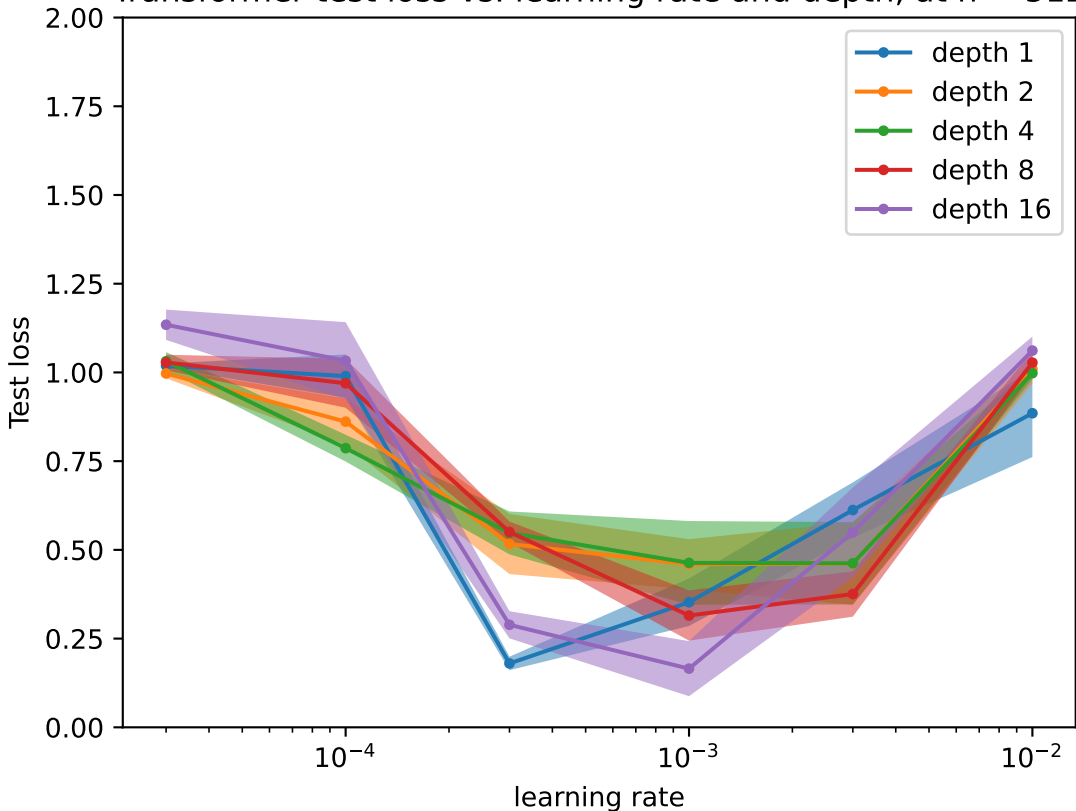

Supplement: supplementary_material [file attachment]

$W_V W_O^T$  in Layer 4, Head 7 of GPT-2

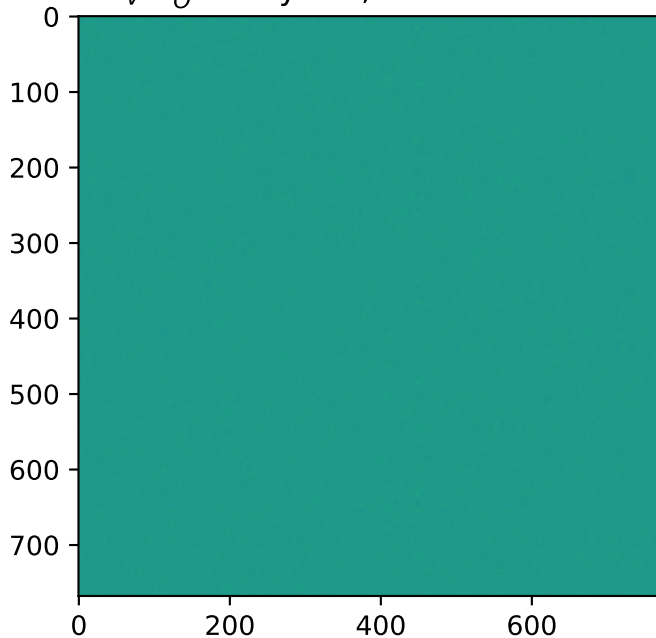

Supplement: supplementary_material [file attachment]

$W_V W_O^T$  in Layer 8, Head 12 of GPT-2

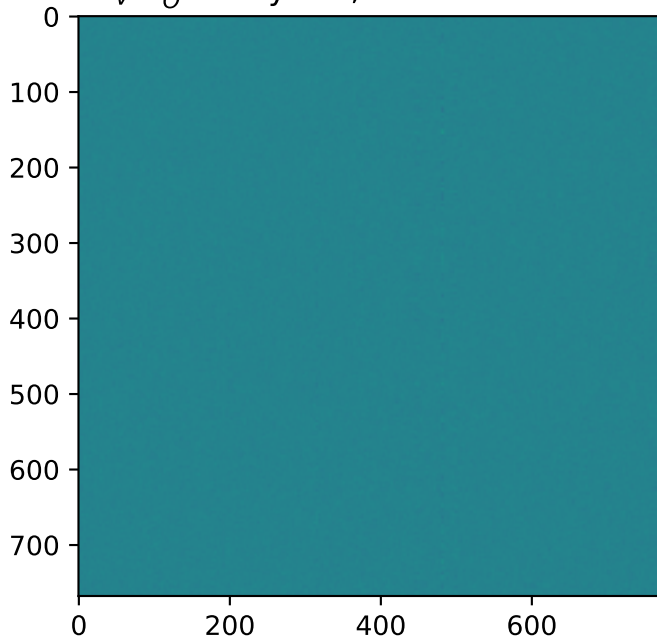

Supplement: supplementary_material [file attachment]

$W_K W_Q^T$  in Layer 6, Head 6 of GPT-2

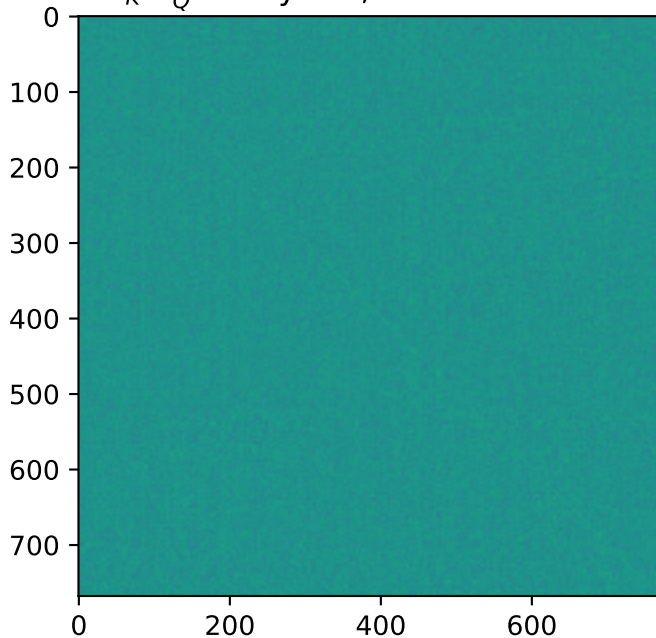

Supplement: supplementary_material [file attachment]

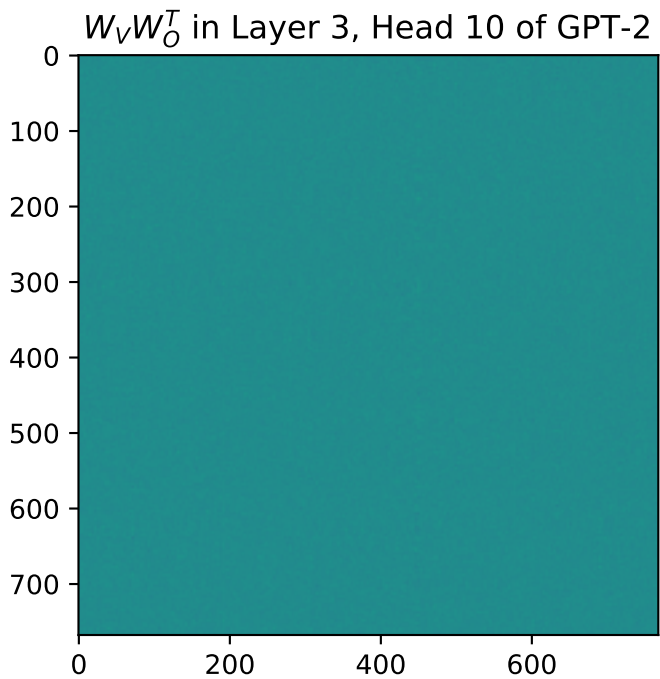

Supplement: supplementary_material [file attachment]

$W_V W_O^T$  in Layer 1, Head 12 of GPT-2

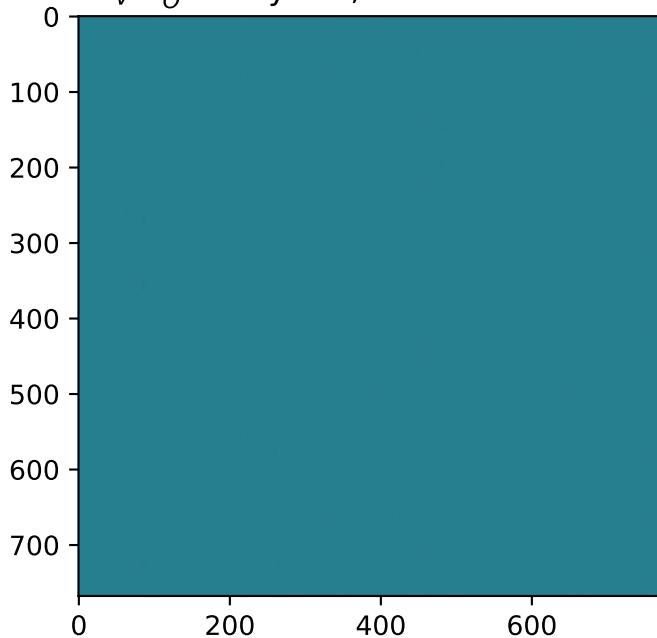

Supplement: supplementary_material [file attachment]

$W_K W_Q^T$  in Layer 12, Head 2 of GPT-2

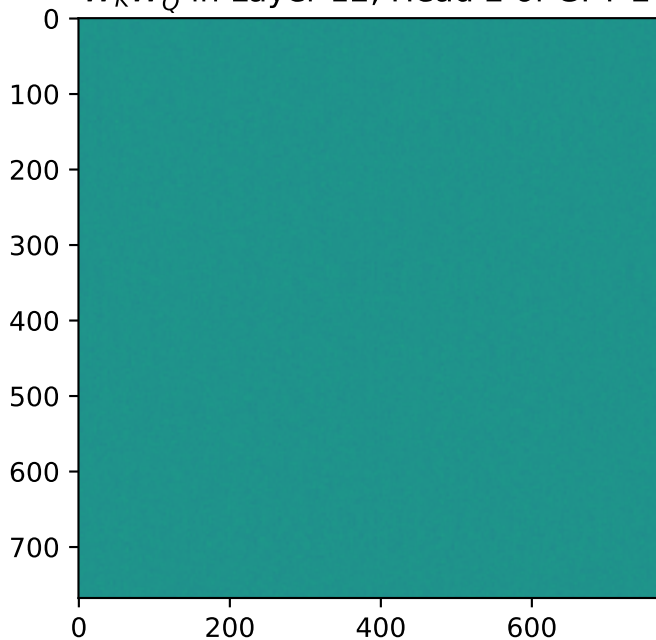

Supplement: supplementary_material [file attachment]

$W_K W_Q^T$  in Layer 12, Head 5 of GPT-2

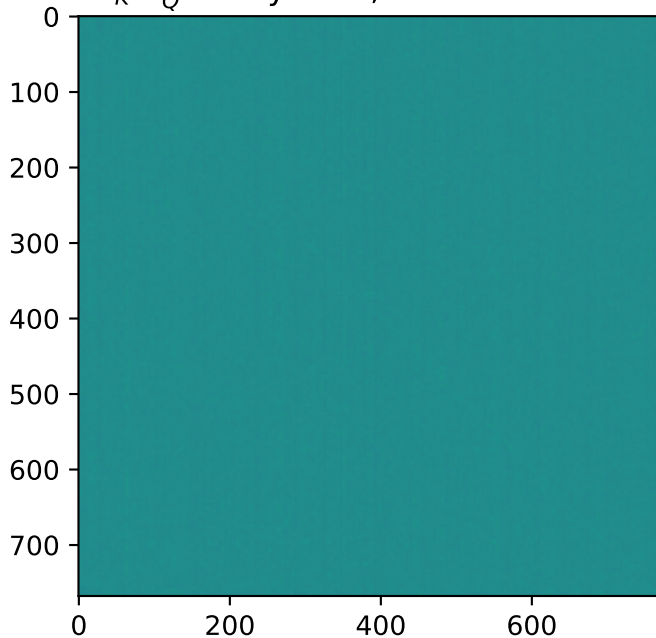

Supplement: supplementary_material [file attachment]

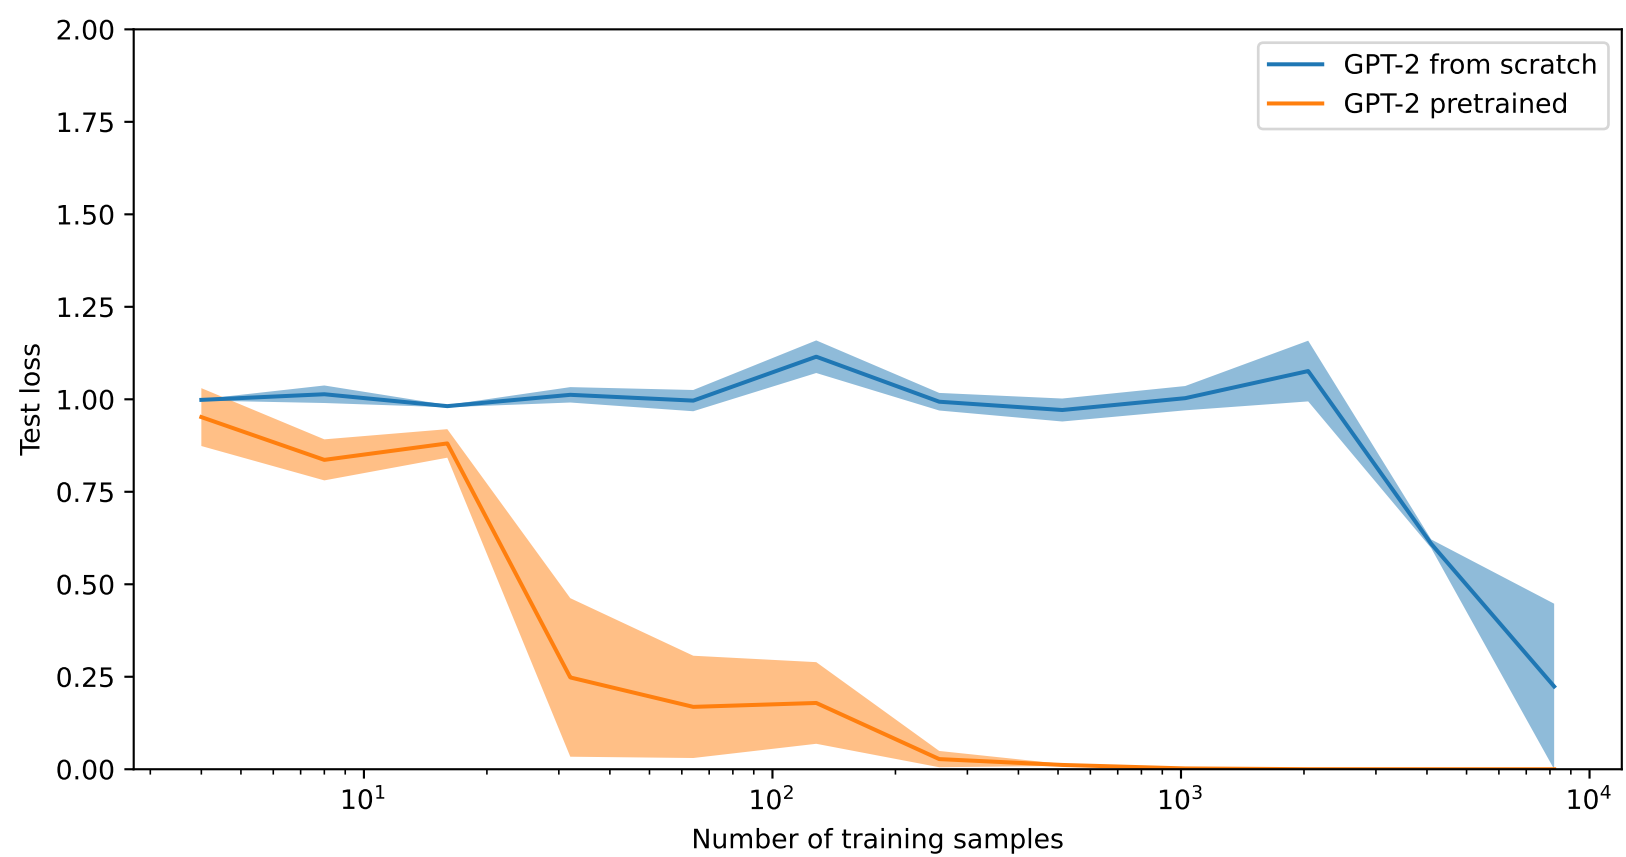

Supplement: supplementary_material [file attachment]

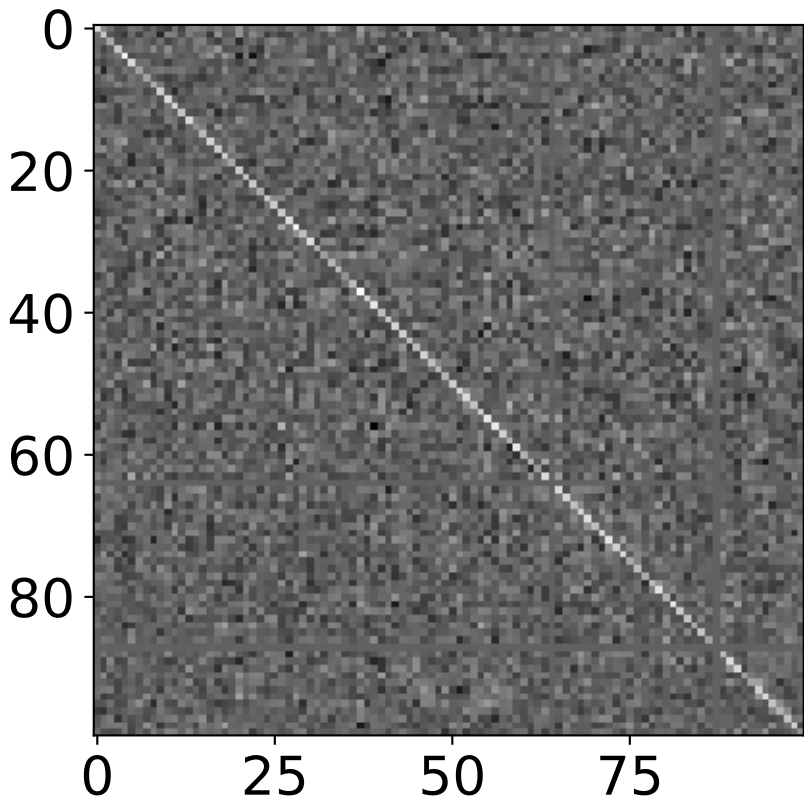

Supplement: supplementary_material [file attachment]

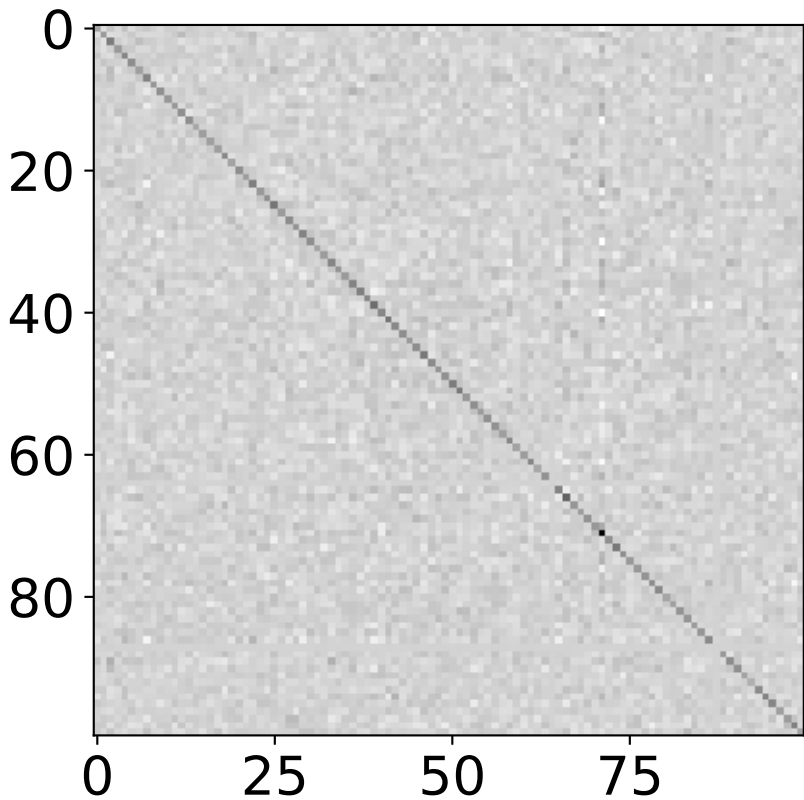

Supplement: supplementary_material [file attachment]

$W_K W_Q^T$  in Layer 1, Head 10 of GPT-2

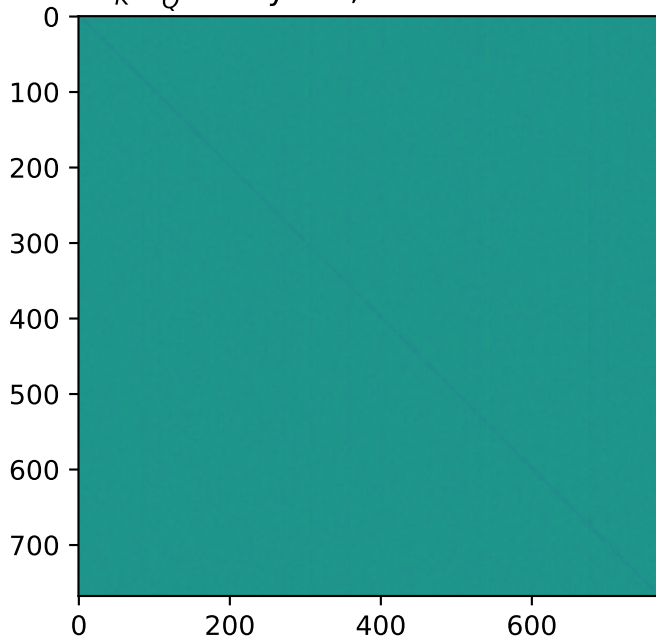

Supplement: supplementary_material [file attachment]

Transformer test loss vs. learning rate and number of heads, at  $n = 512$

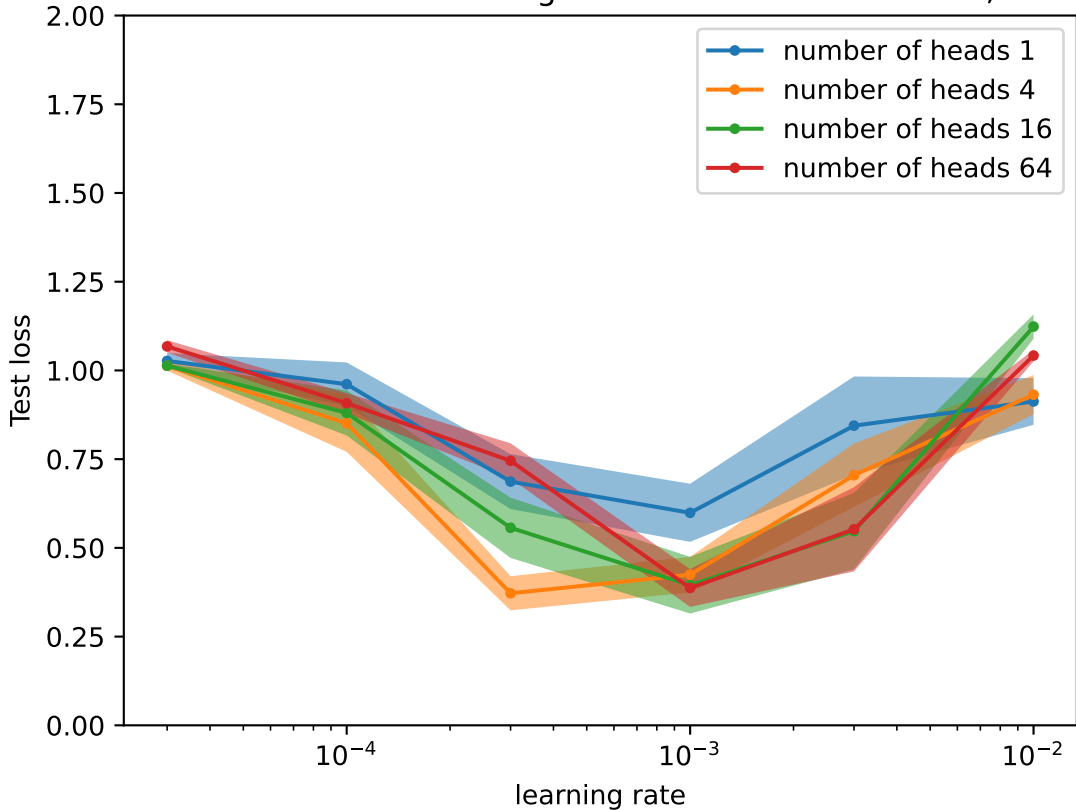

Supplement: supplementary_material [file attachment]

$W_K W_Q^T$  in Layer 7, Head 5 of GPT-2

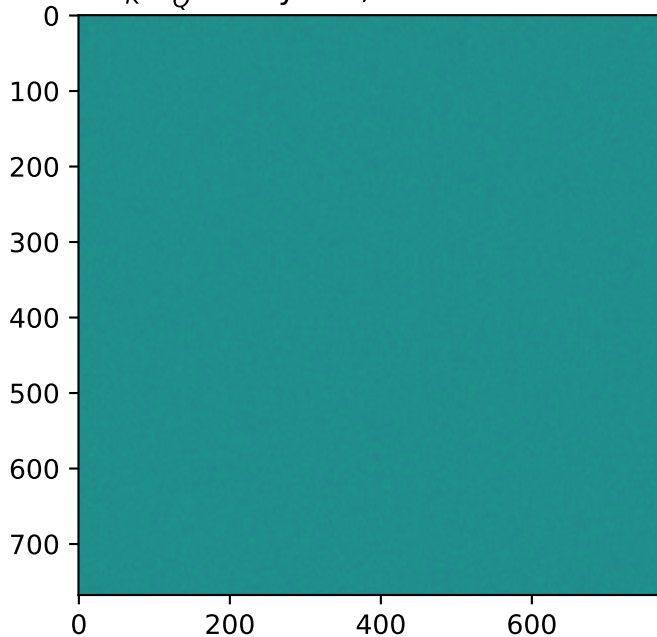

Supplement: supplementary_material [file attachment]

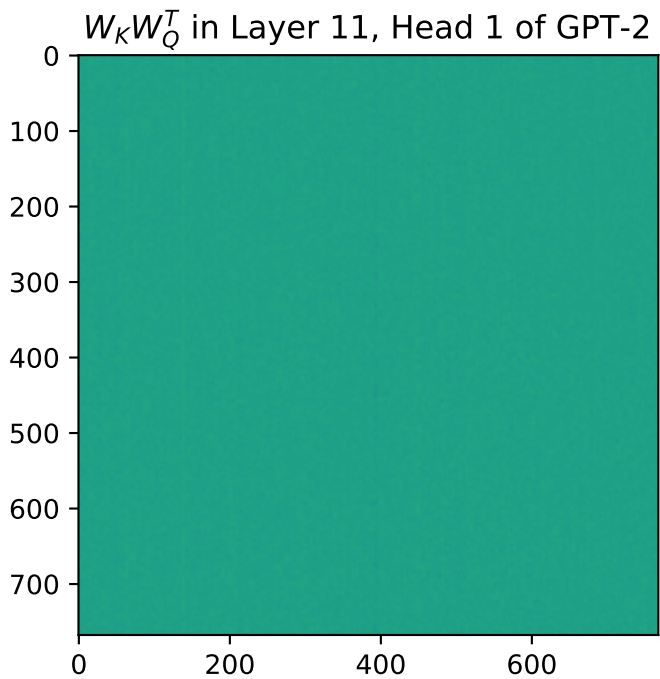

Supplement: supplementary_material [file attachment]

$W_V W_O^T$  in Layer 3, Head 5 of GPT-2

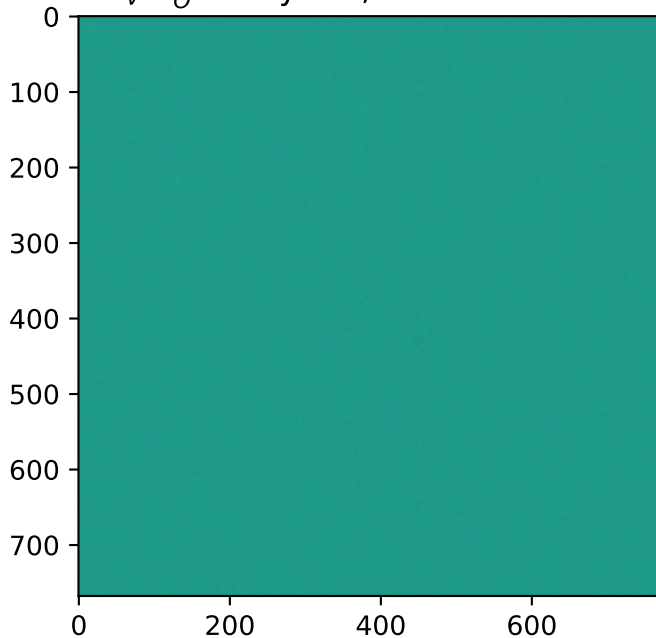

Supplement: supplementary_material [file attachment]

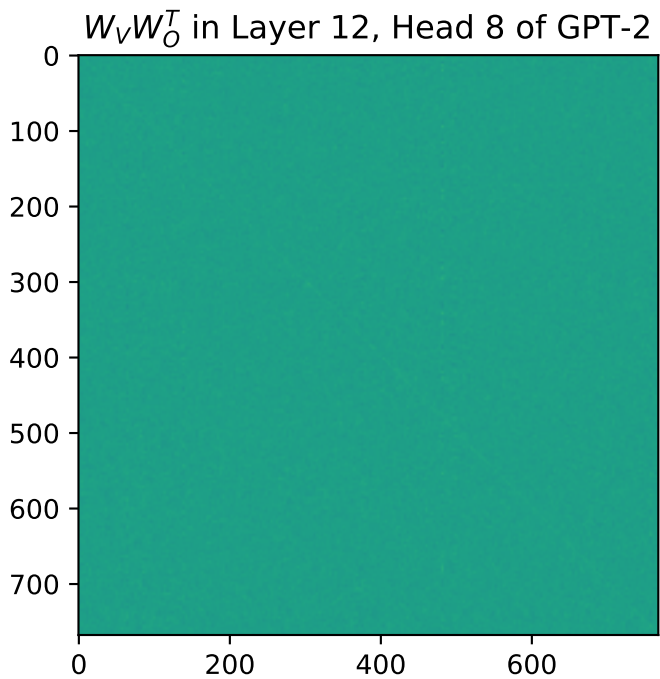

Supplement: supplementary_material [file attachment]

$W_V W_O^T$  in Layer 9, Head 11 of GPT-2

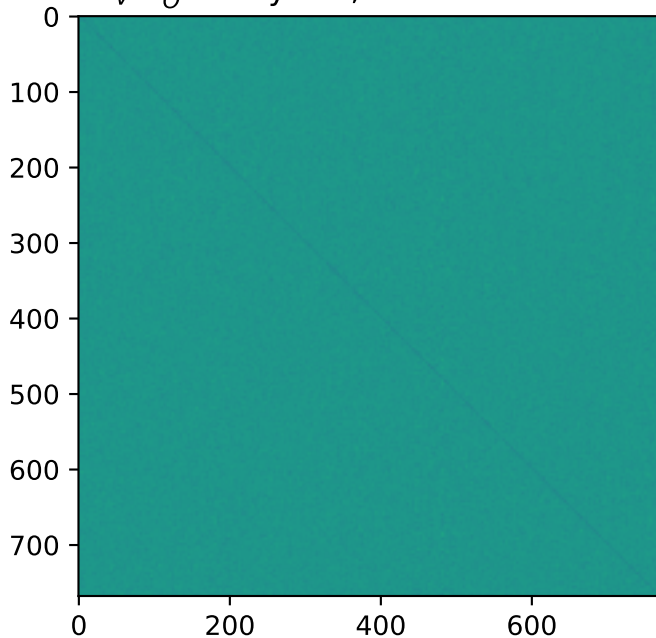

Supplement: supplementary_material [file attachment]

$W_V W_O^T$  in Layer 7, Head 11 of GPT-2

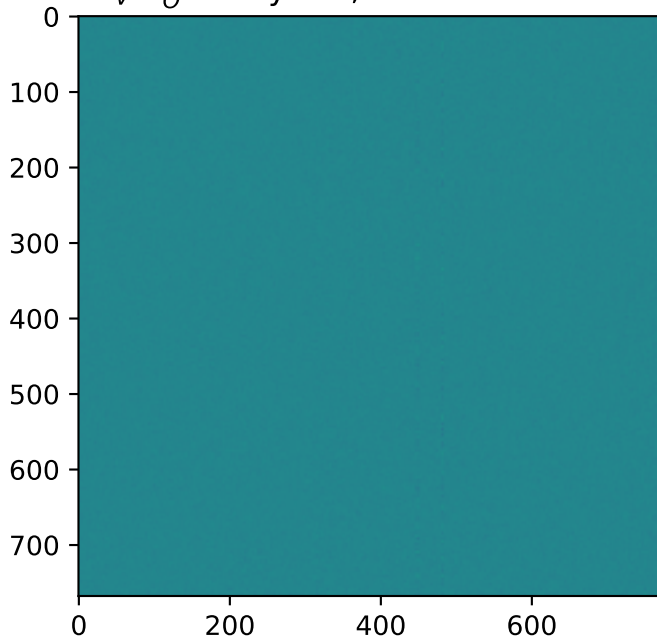

Supplement: supplementary_material [file attachment]

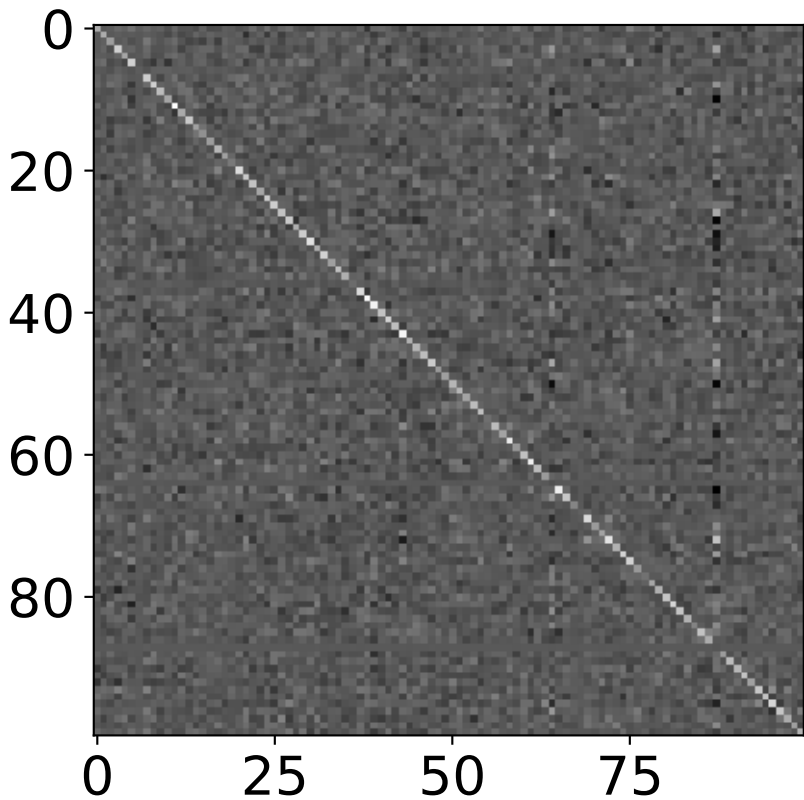

Supplement: supplementary_material [file attachment]

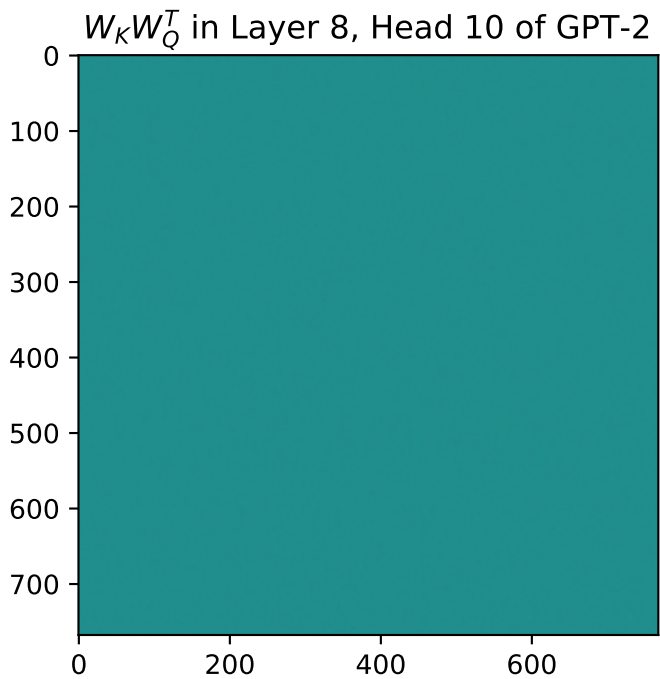

Supplement: supplementary_material [file attachment]

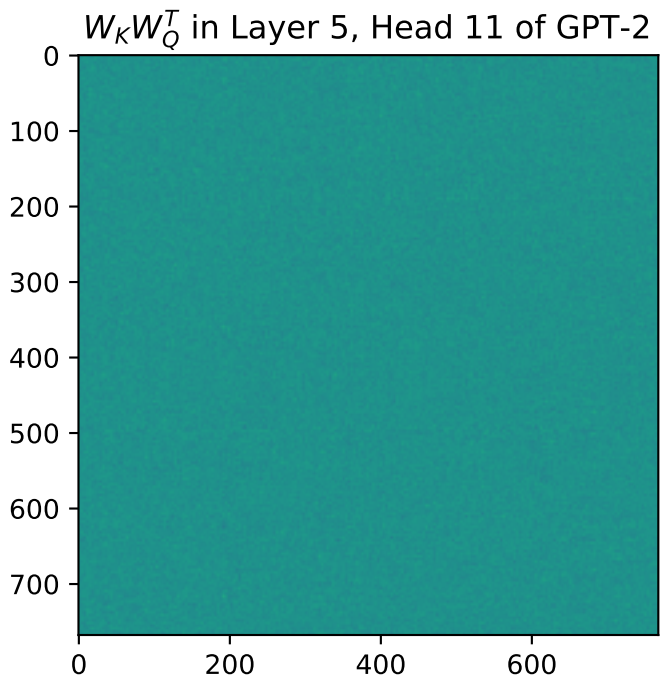

Supplement: supplementary_material [file attachment]

$W_K W_Q^T$  in Layer 6, Head 10 of GPT-2

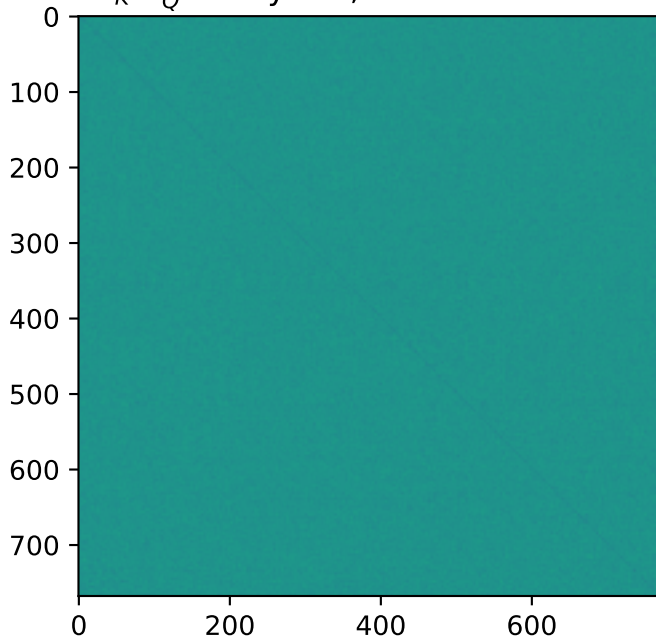

Supplement: supplementary_material [file attachment]

$W_K W_Q^T$  in Layer 8, Head 6 of GPT-2

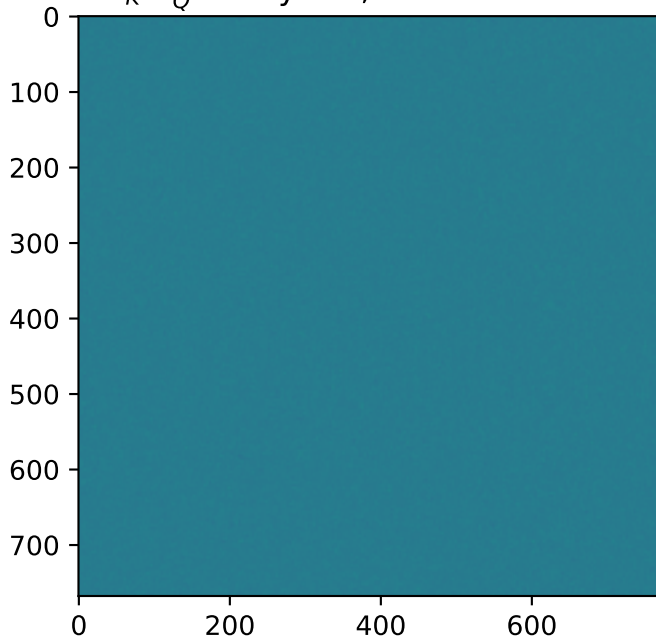

Supplement: supplementary_material [file attachment]

$W_K W_Q^T$  in Layer 6, Head 9 of GPT-2

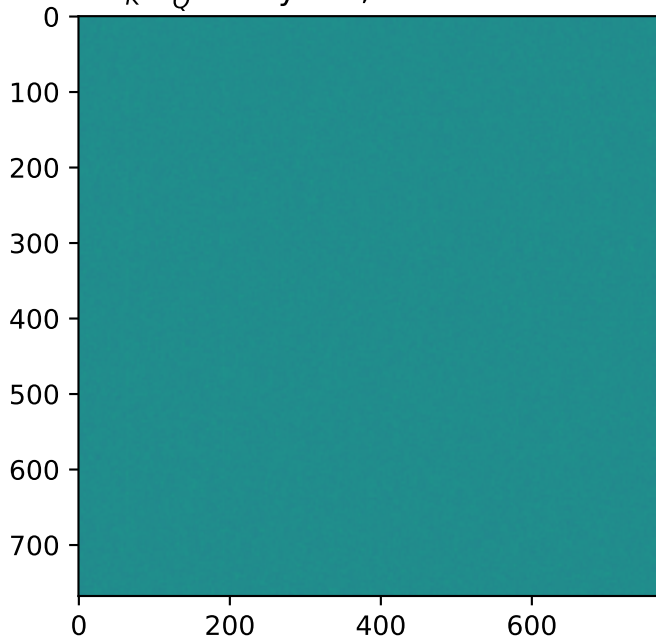

Supplement: supplementary_material [file attachment]

GOTU for transformer on associative memory vs. LR and n

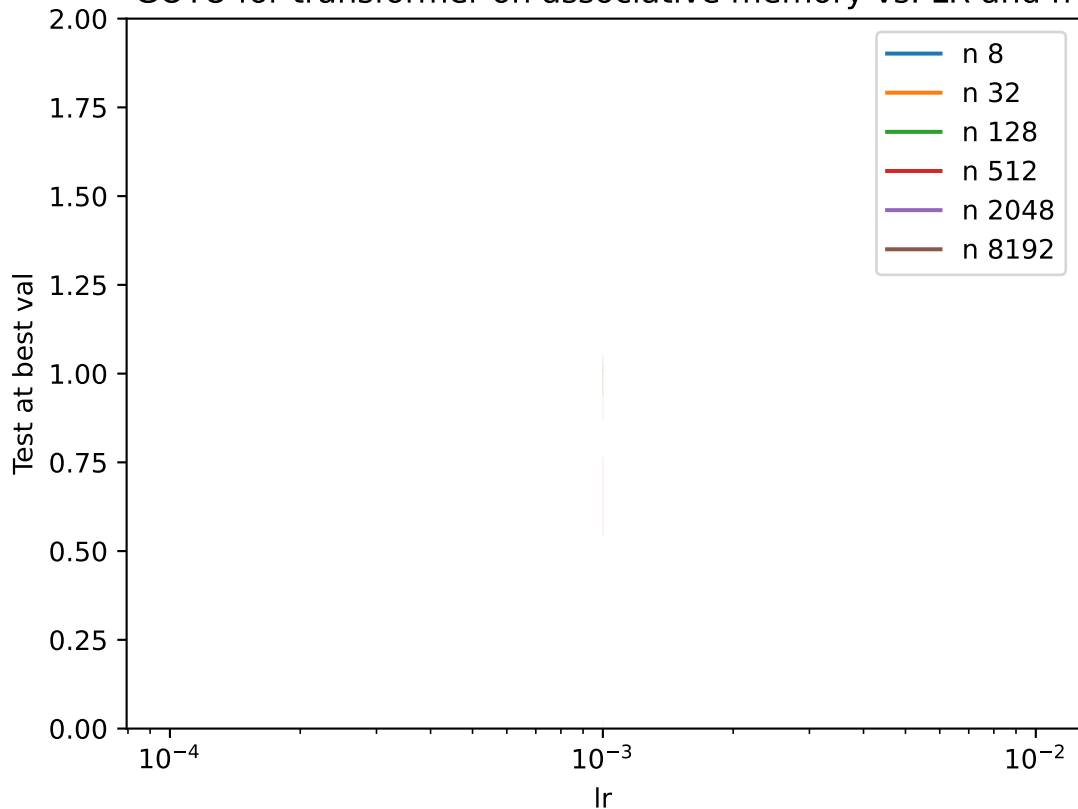

Supplement: supplementary_material [file attachment]

$W_K W_Q^T$  in Layer 9, Head 3 of GPT-2

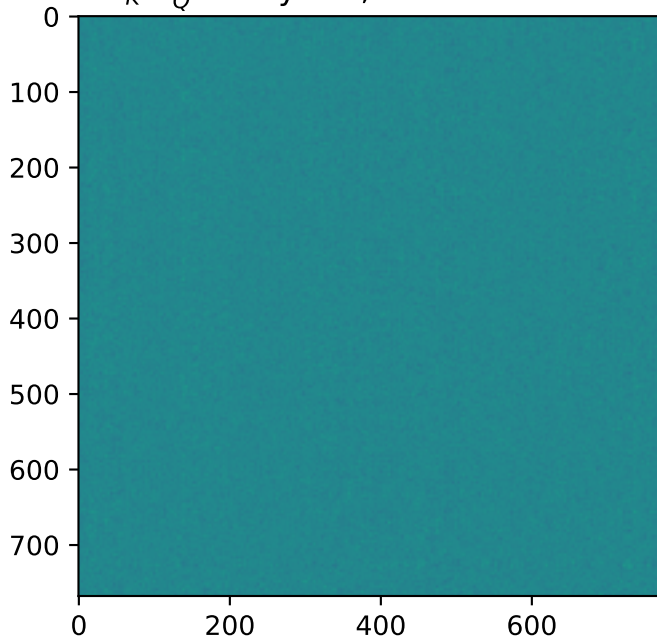

Supplement: supplementary_material [file attachment]

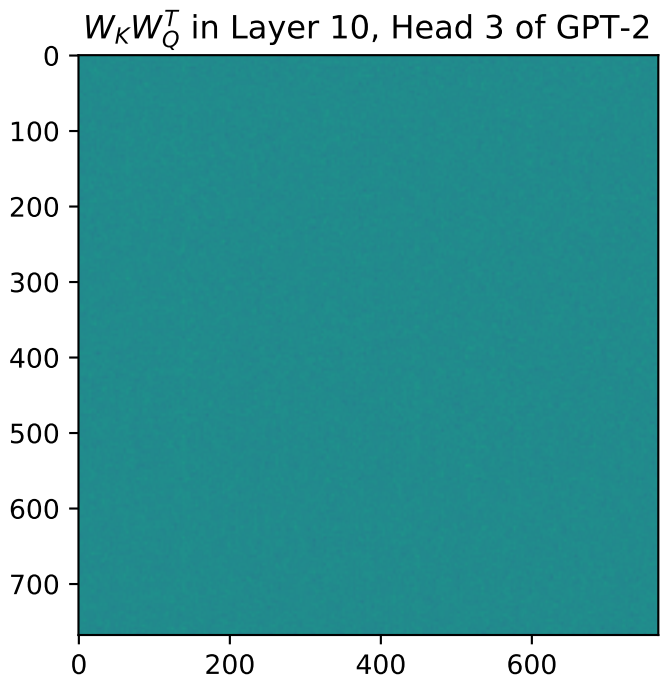

Supplement: supplementary_material [file attachment]

Test loss for FC net, depth=2

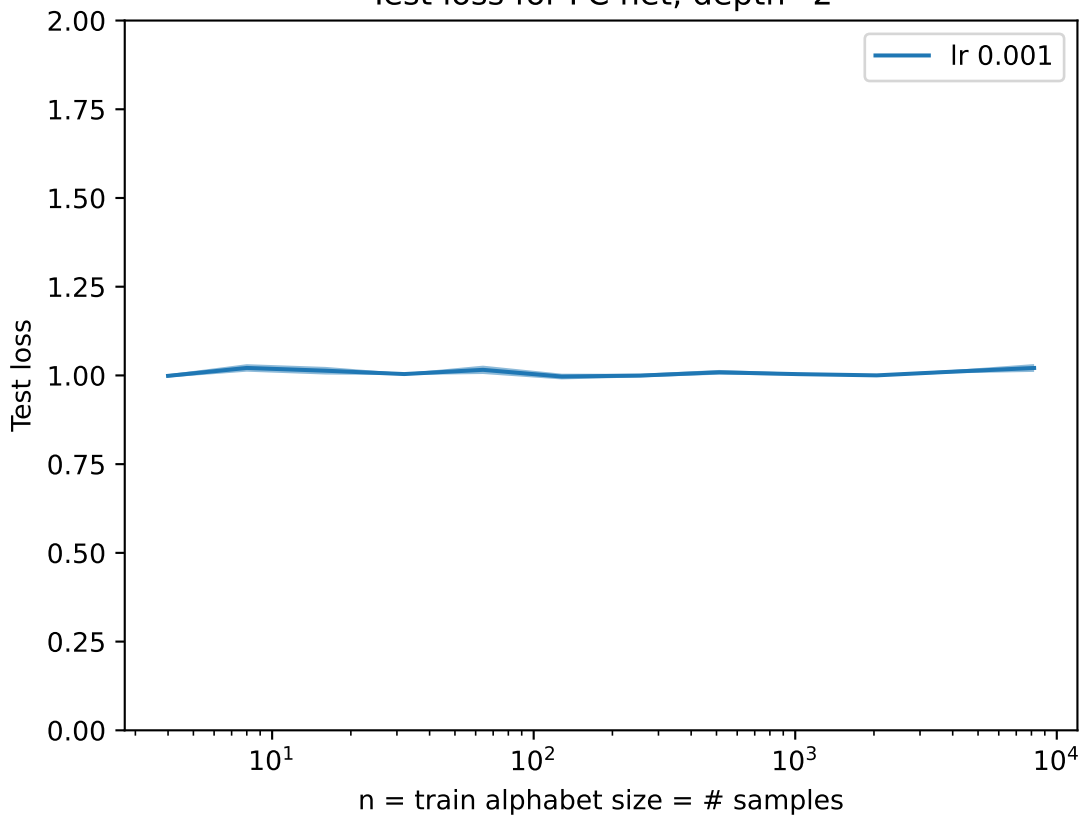

Supplement: supplementary_material [file attachment]

Transformer test loss vs. learning rate and embedding dimension, at  $n = 1024$

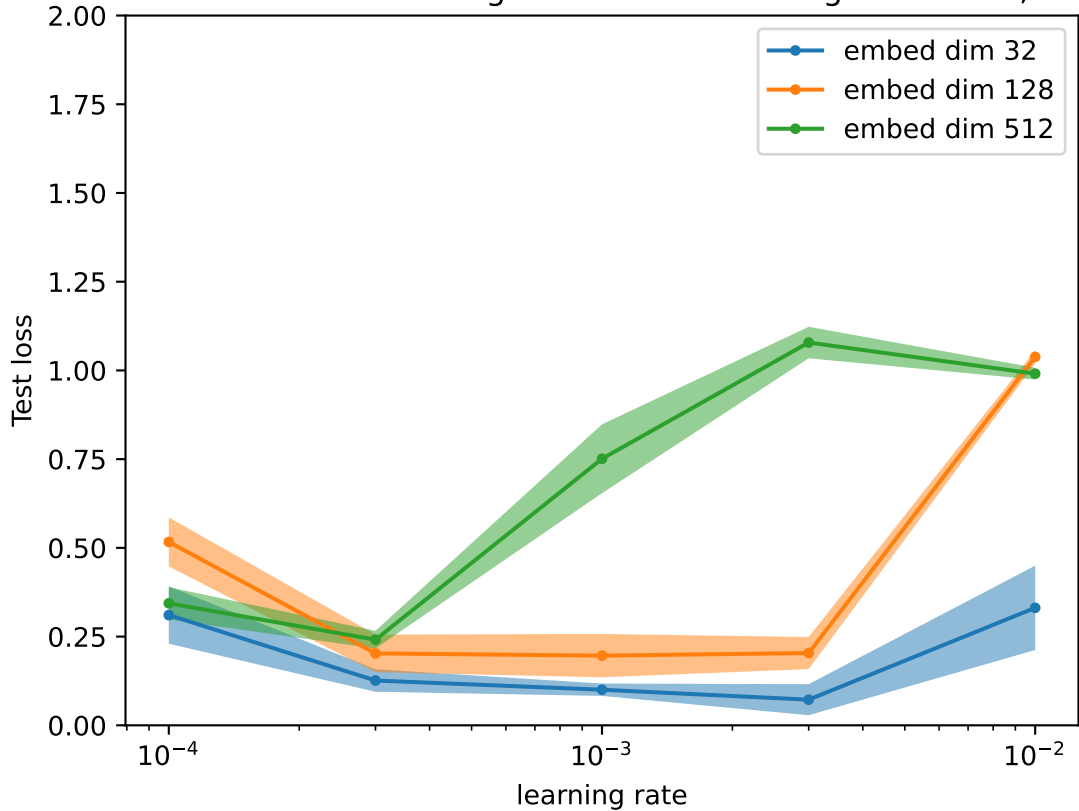

Supplement: supplementary_material [file attachment]

$W_K W_Q^T$  in Layer 5, Head 1 of GPT-2

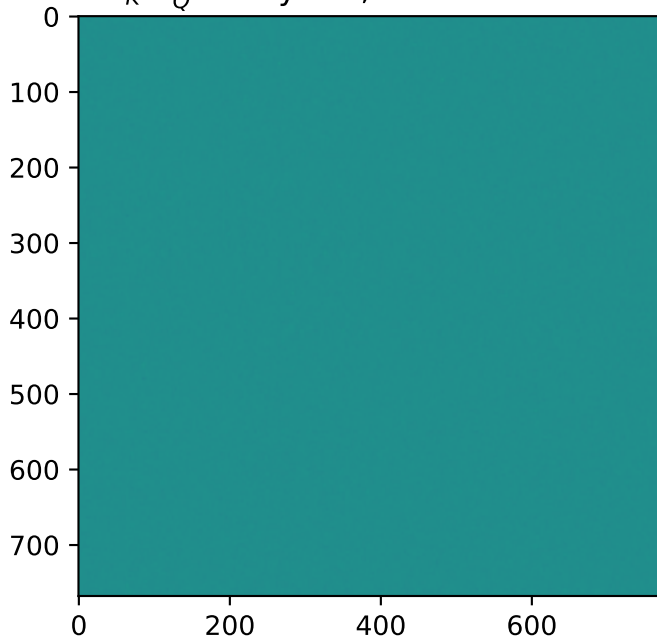

Supplement: supplementary_material [file attachment]



Supplement: supplementary_material [file attachment]

$W_V W_O^T$  in Layer 6, Head 2 of GPT-2

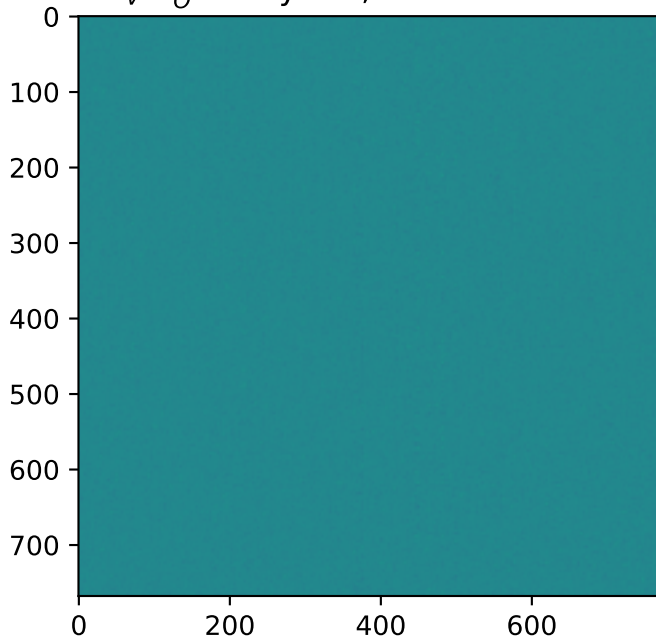

Supplement: supplementary_material [file attachment]

$W_K W_Q^T$  in Layer 4, Head 4 of GPT-2

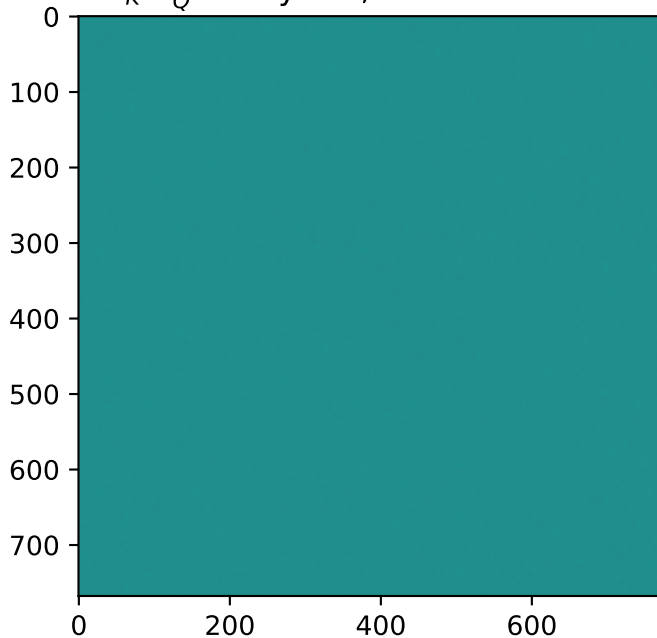

Supplement: supplementary_material [file attachment]

$W_V W_O^T$  in Layer 7, Head 3 of GPT-2

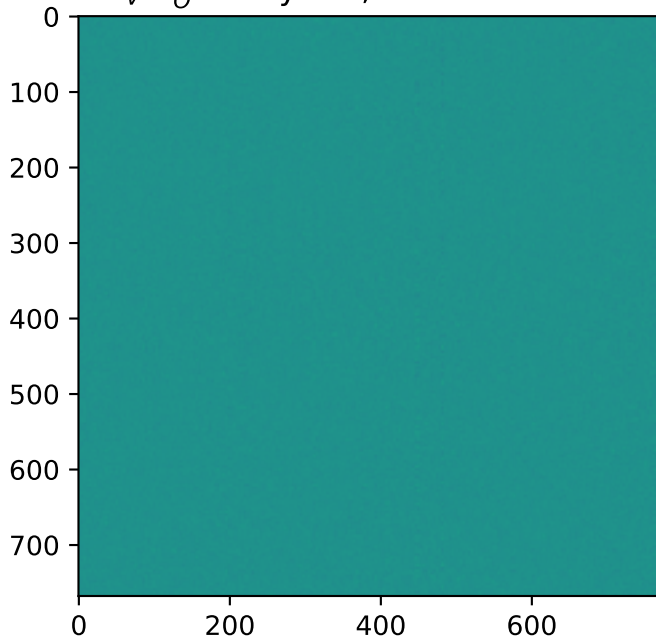

Supplement: supplementary_material [file attachment]

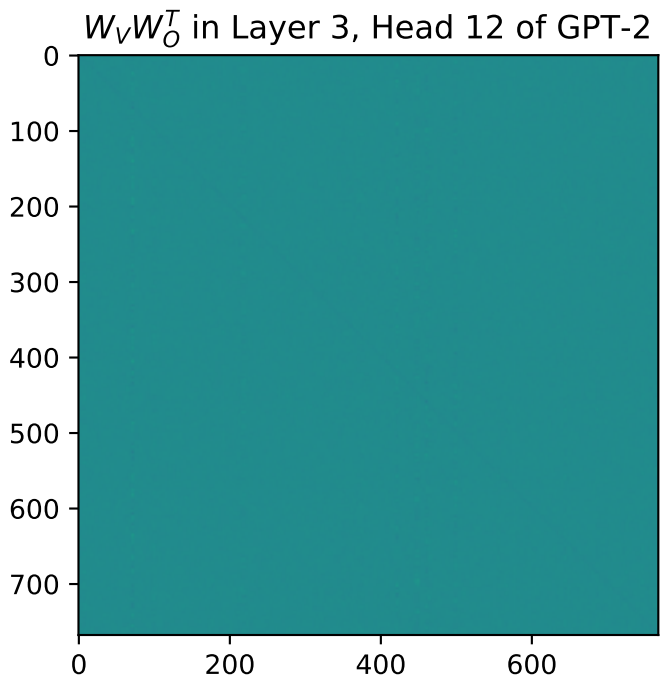

Supplement: supplementary_material [file attachment]

$W_V W_O^T$  in Layer 10, Head 5 of GPT-2

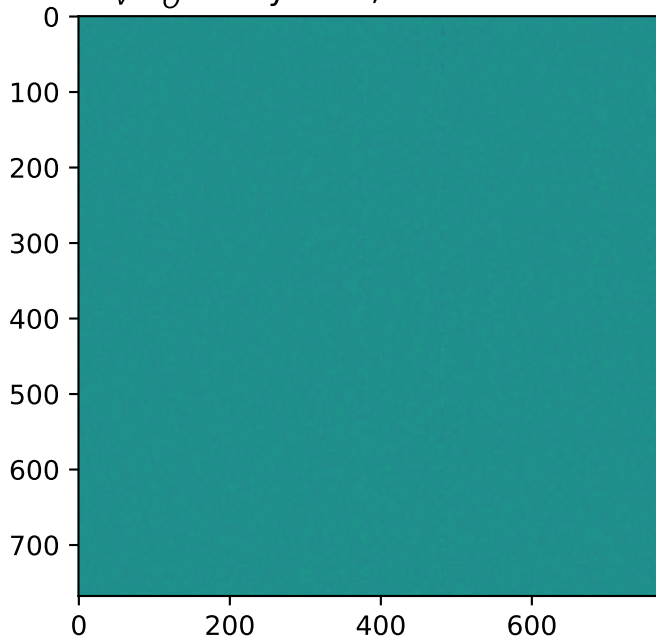

Supplement: supplementary_material [file attachment]

$W_V W_O^T$  in Layer 6, Head 4 of GPT-2

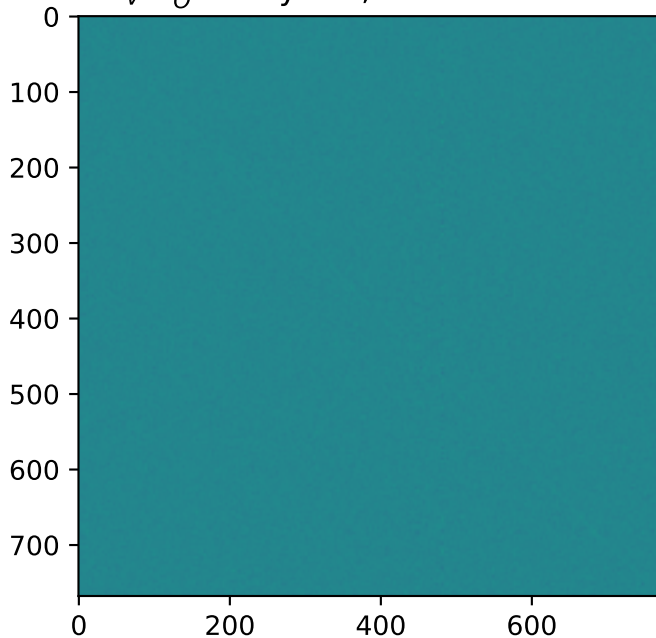

Supplement: supplementary_material [file attachment]

$W_V W_O^T$  in Layer 3, Head 2 of GPT-2

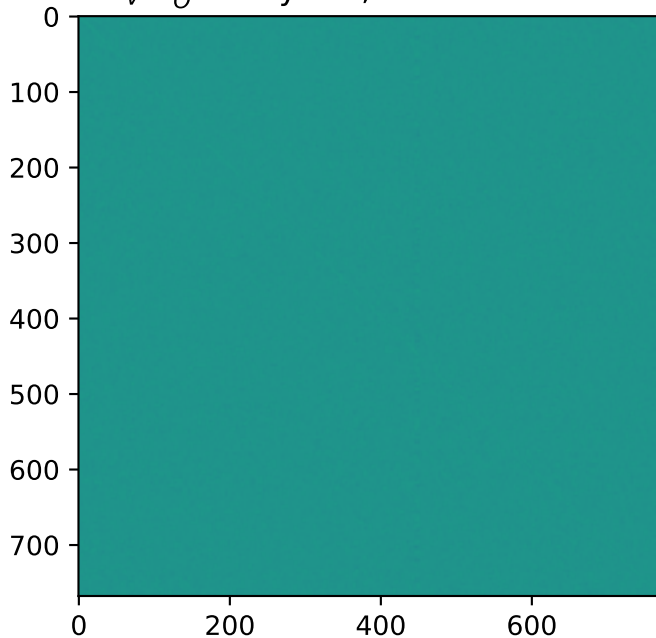

Supplement: supplementary_material [file attachment]

$W_K W_Q^T$  in Layer 1, Head 1 of GPT-2

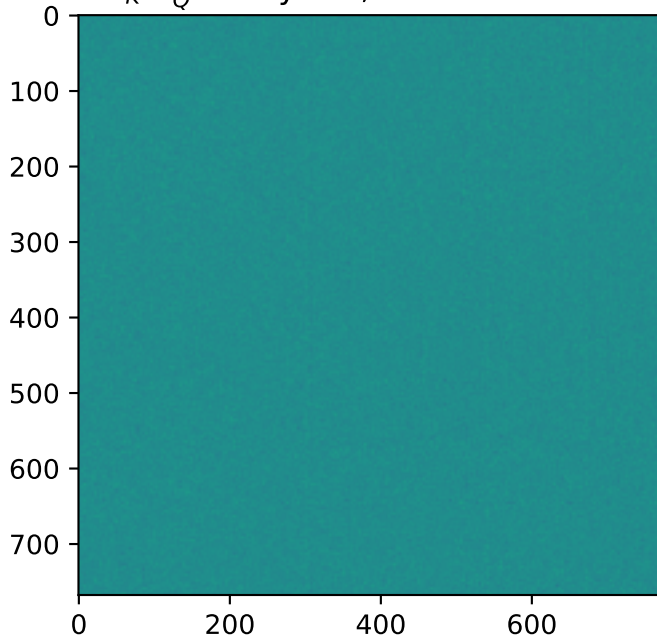

Supplement: supplementary_material [file attachment]

$W_K W_Q^T$  in Layer 11, Head 4 of GPT-2

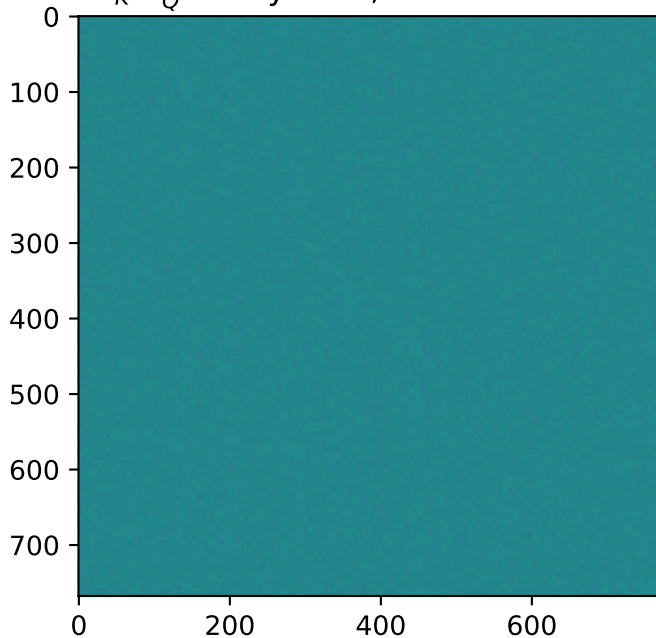

Supplement: supplementary_material [file attachment]

$W_V W_O^T$  in Layer 2, Head 7 of GPT-2

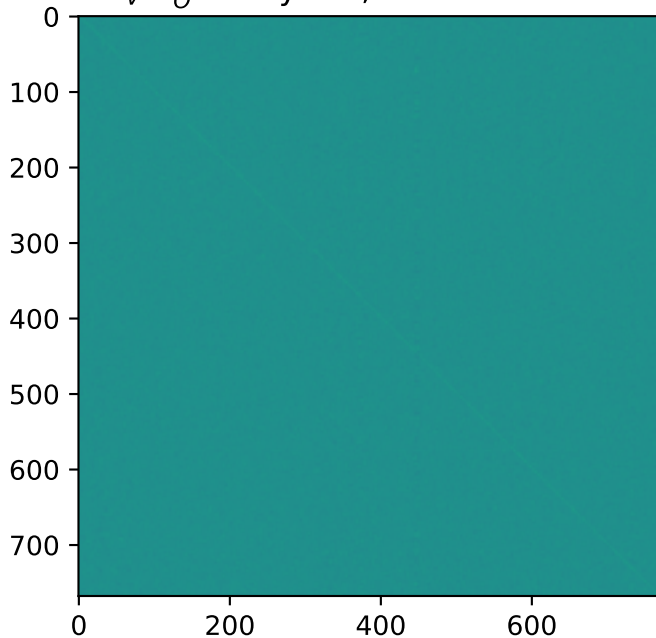

Supplement: supplementary_material [file attachment]

$W_K W_Q^T$  in Layer 9, Head 12 of GPT-2

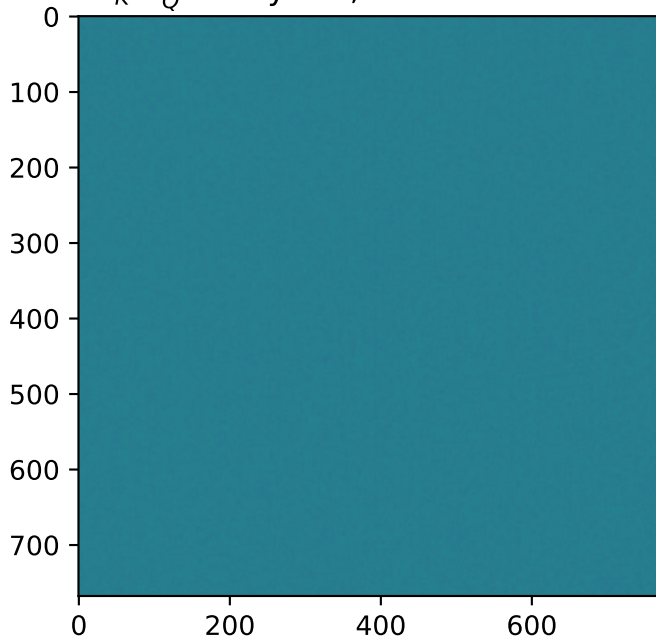

Supplement: supplementary_material [file attachment]

Transformer GOTU vs. learning rate and depth, at  $n = 1024$

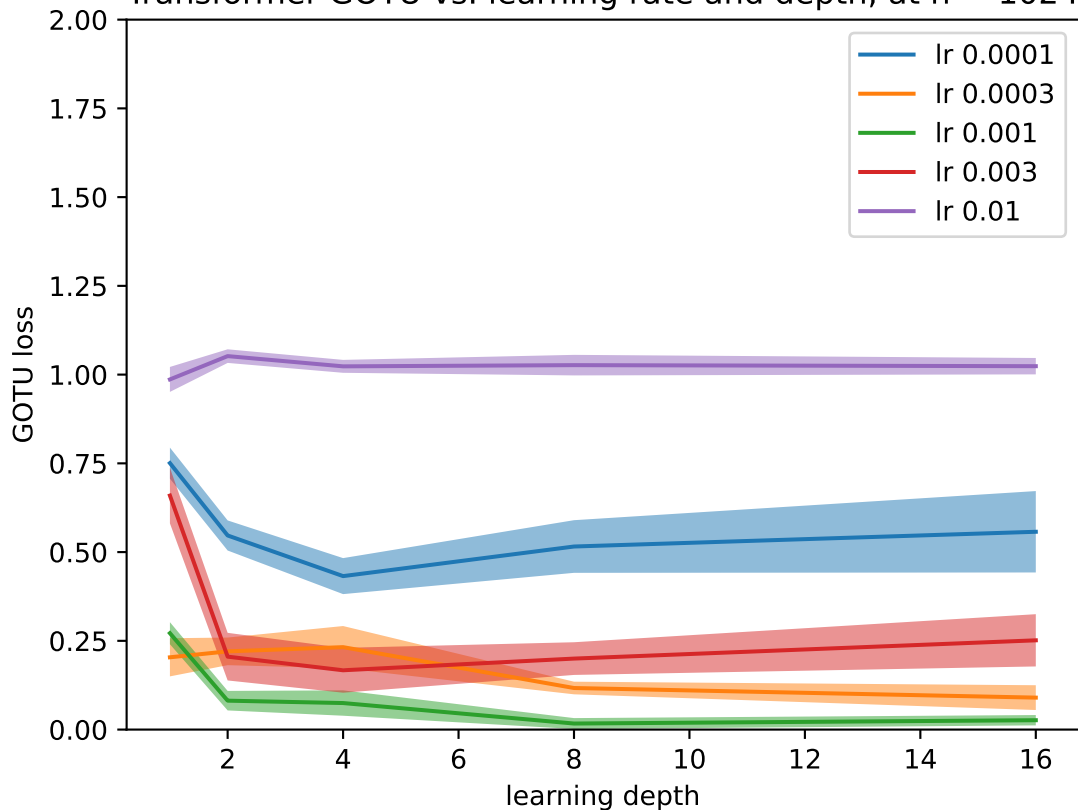

Supplement: supplementary_material [file attachment]

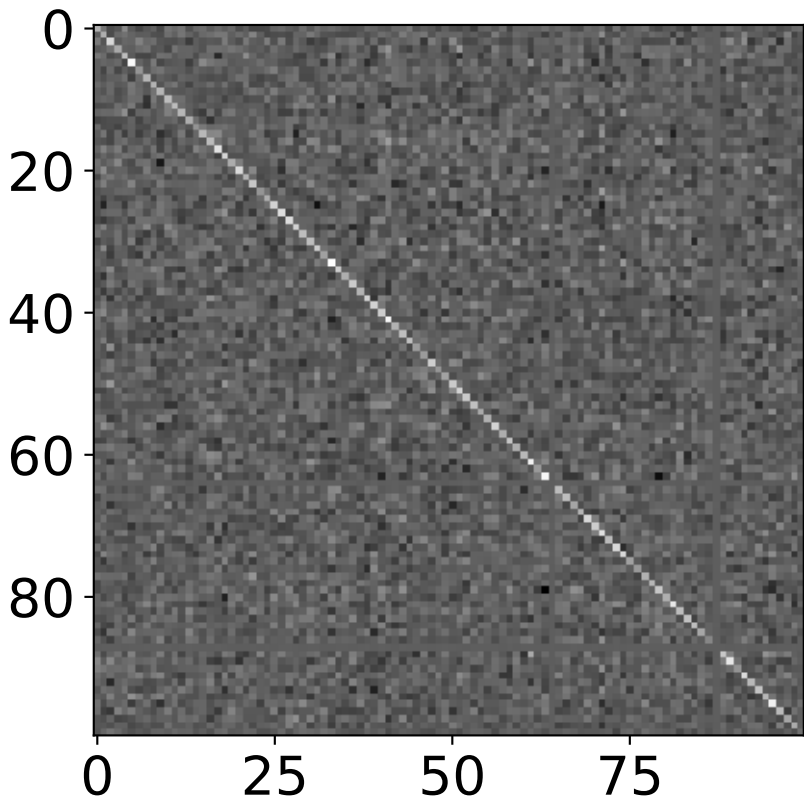

Supplement: supplementary_material [file attachment]

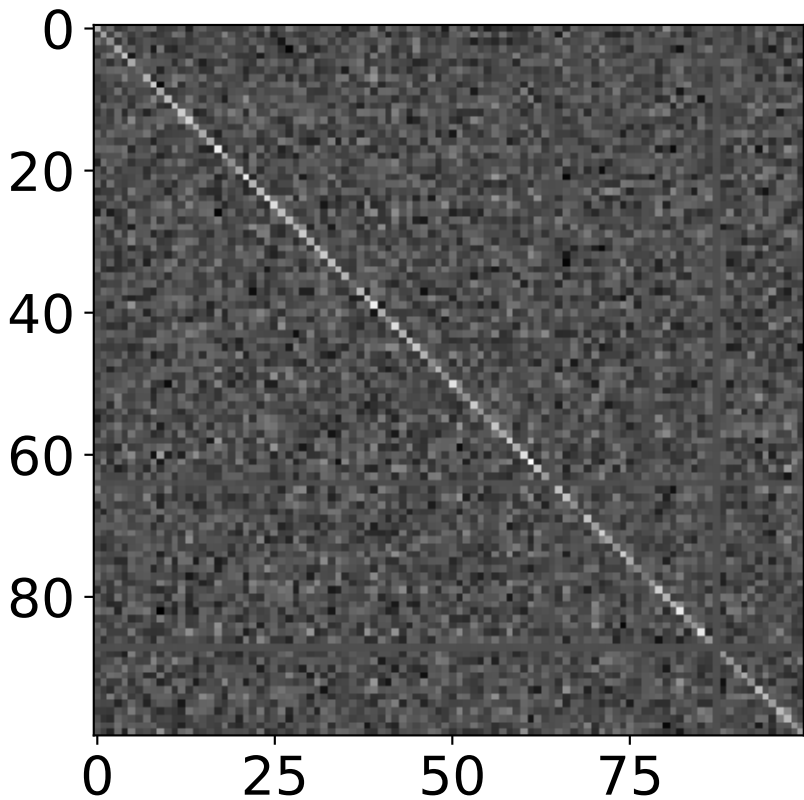

Supplement: supplementary_material [file attachment]

$W_V W_O^T$  in Layer 4, Head 8 of GPT-2

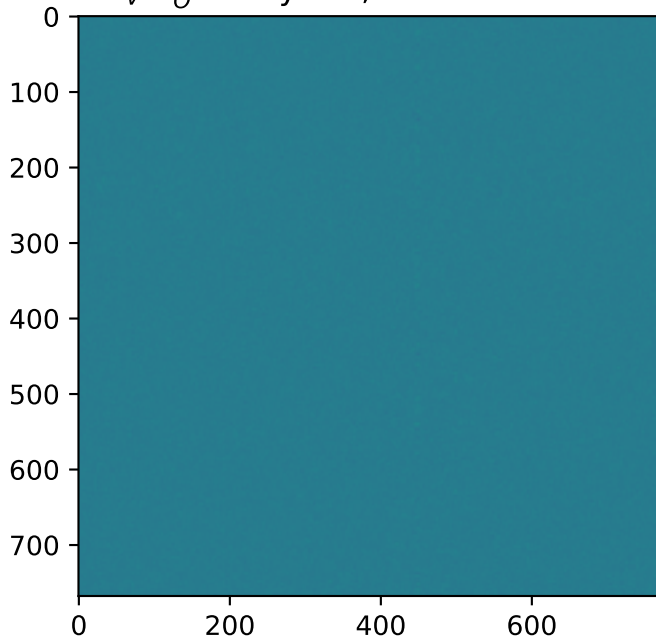

Supplement: supplementary_material [file attachment]

$W_V W_O^T$  in Layer 5, Head 4 of GPT-2

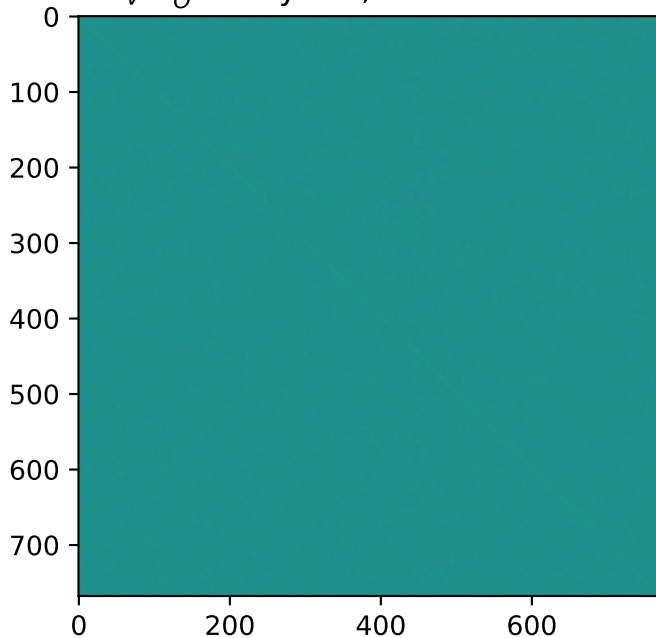

Supplement: supplementary_material [file attachment]

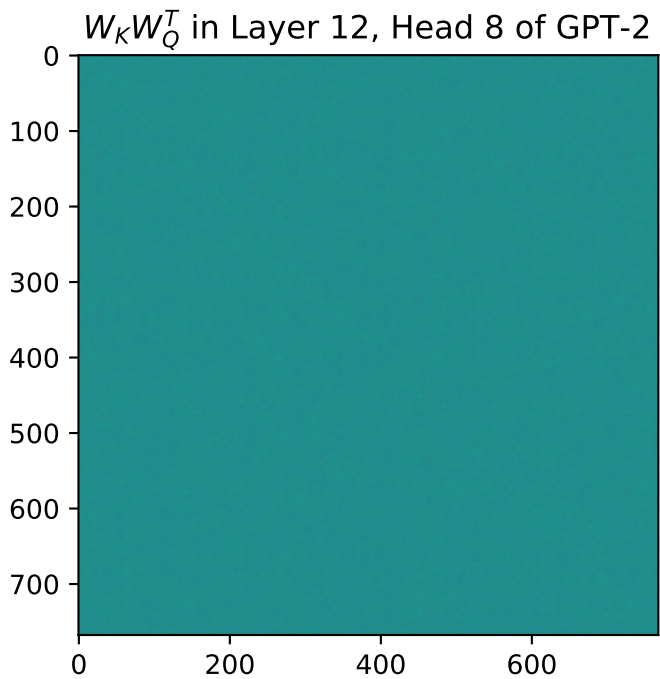

Supplement: supplementary_material [file attachment]

### Transformer train loss on random tasks with different regular alphabet sizes

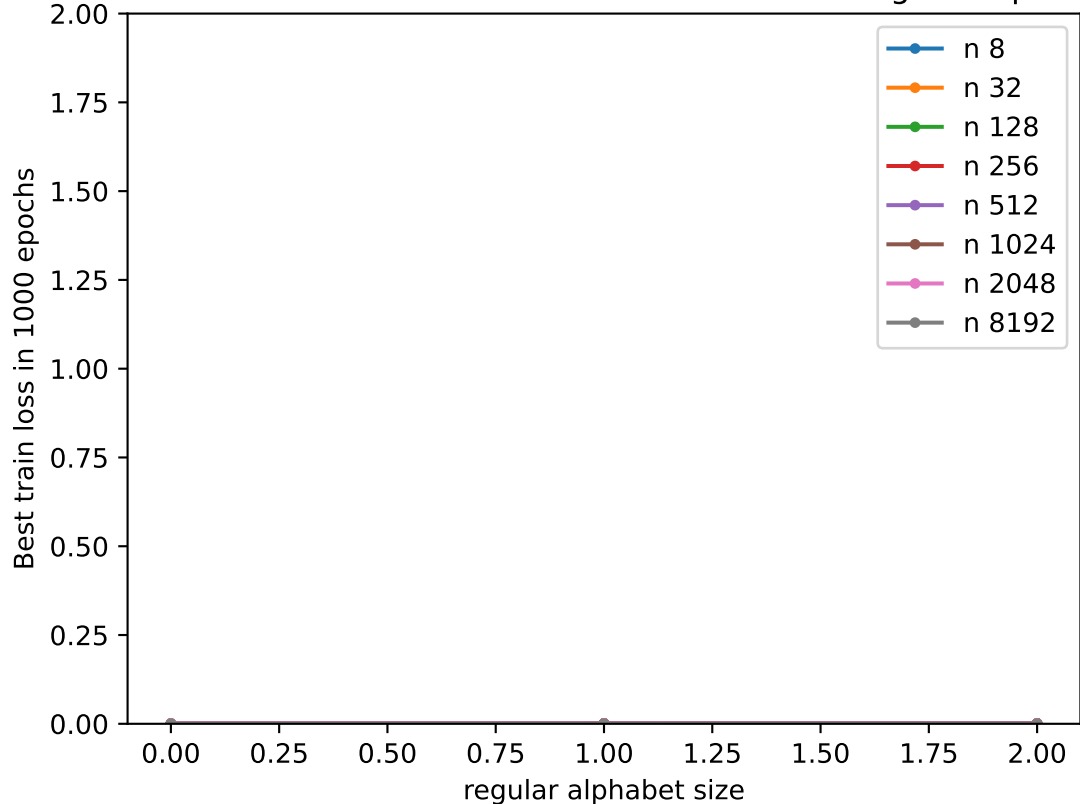

Supplement: supplementary_material [file attachment]



Supplement: supplementary_material [file attachment]

Transformer test loss on random tasks with different numbers of templates

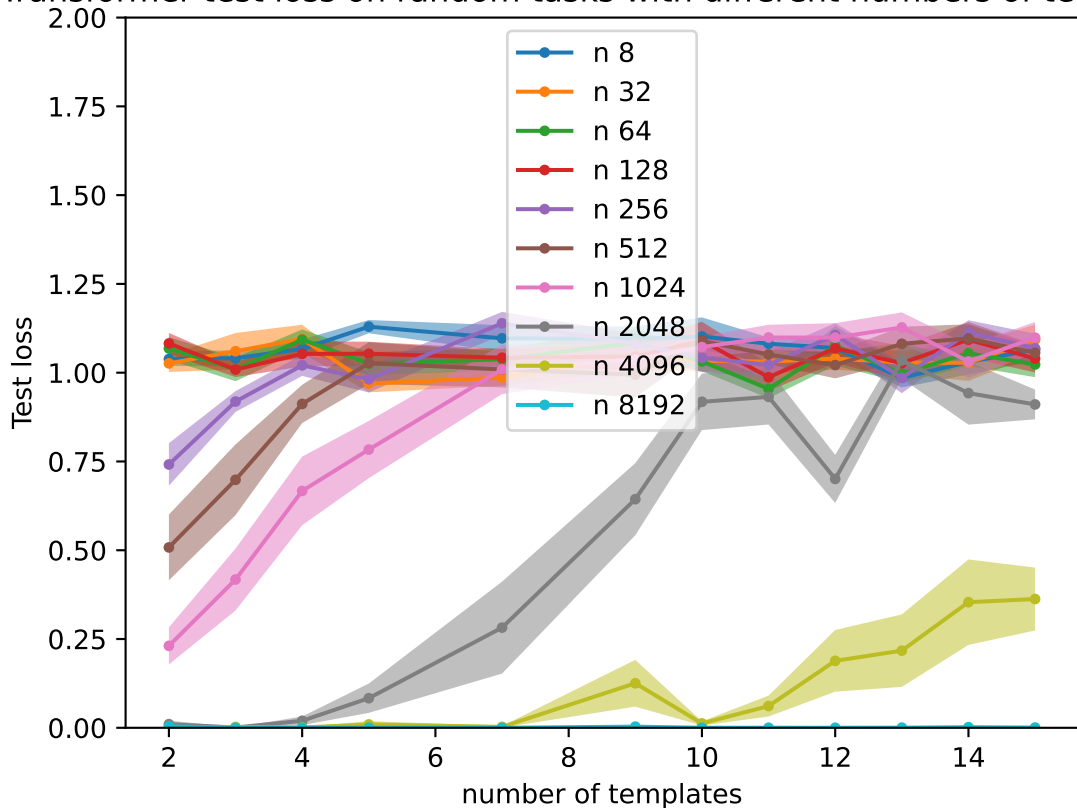

Supplement: supplementary_material [file attachment]

$W_K W_Q^T$  in Layer 3, Head 9 of GPT-2

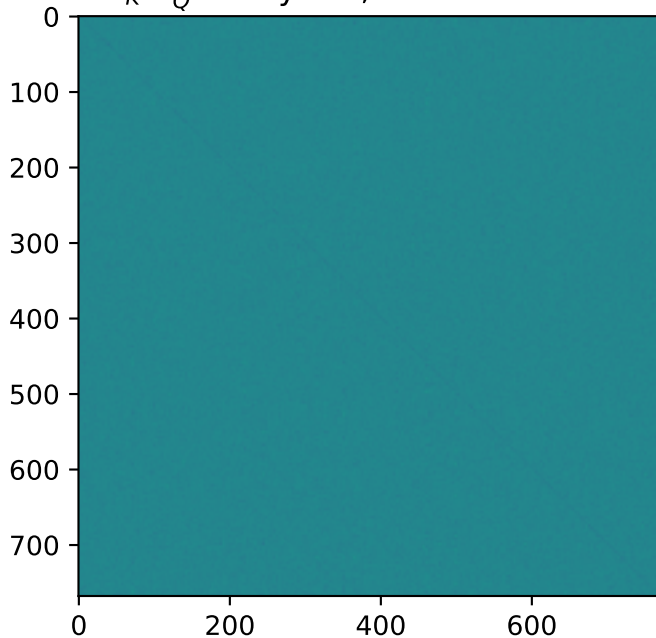

Supplement: supplementary_material [file attachment]

$W_K W_Q^T$  in Layer 8, Head 3 of GPT-2

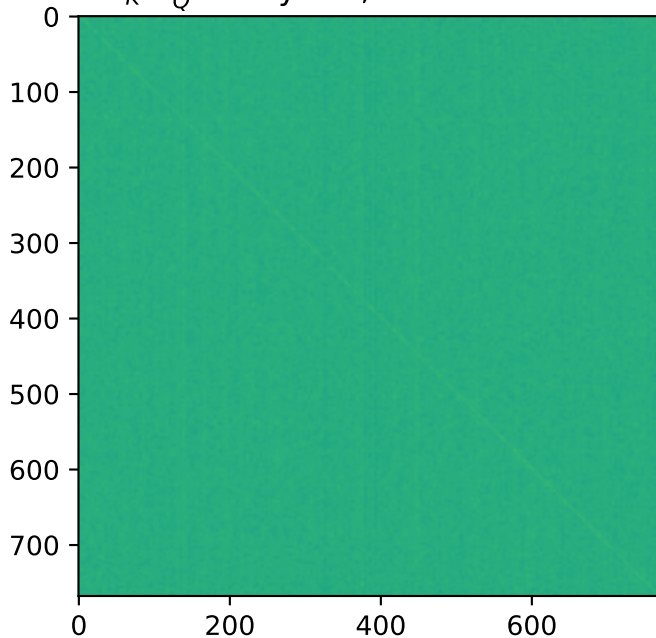

Supplement: supplementary_material [file attachment]

$W_K W_Q^T$  in Layer 3, Head 4 of GPT-2

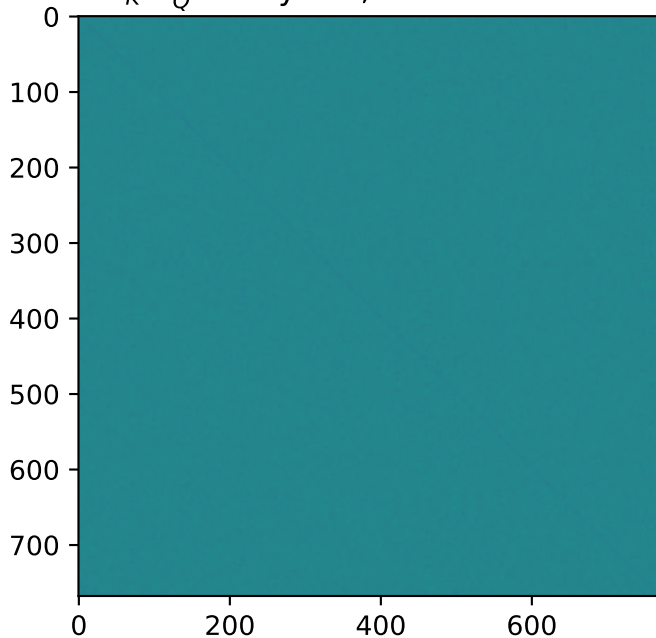

Supplement: supplementary_material [file attachment]

$W_K W_Q^T$  in Layer 2, Head 2 of GPT-2

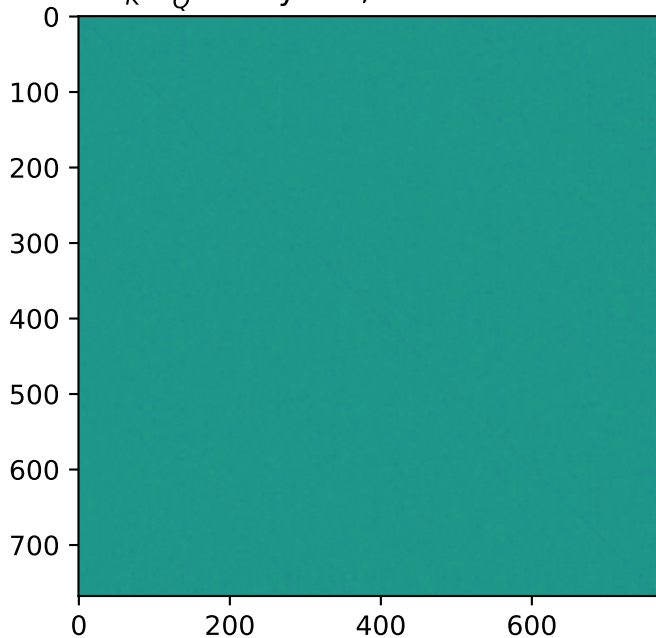

Supplement: supplementary_material [file attachment]

$W_V W_O^T$  in Layer 11, Head 4 of GPT-2

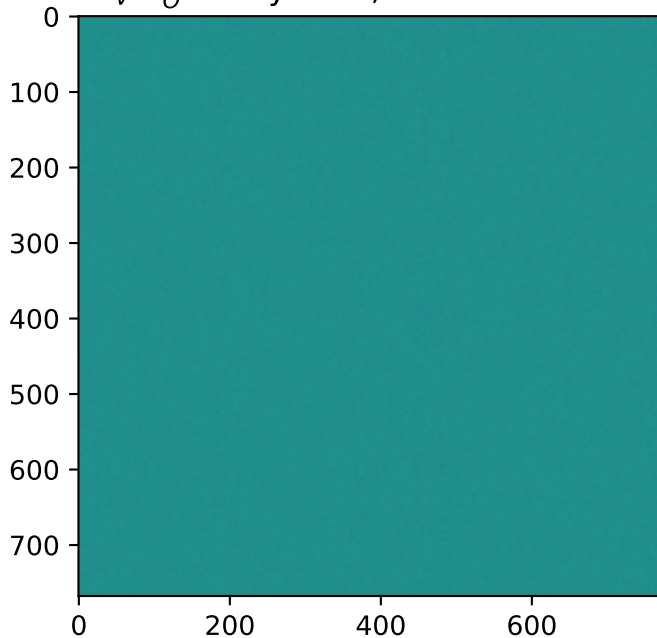

Supplement: supplementary_material [file attachment]

$W_K W_Q^T$  in Layer 12, Head 10 of GPT-2

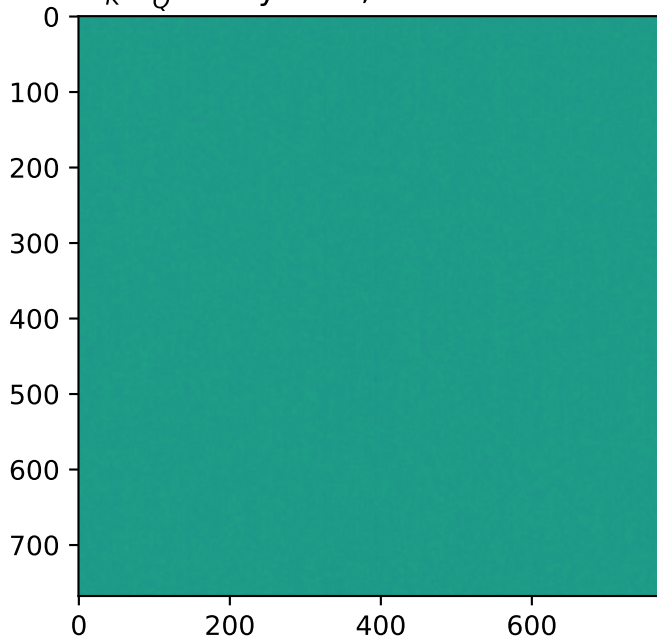

Supplement: supplementary_material [file attachment]

## Transformer train loss vs. learning rate and number of samples

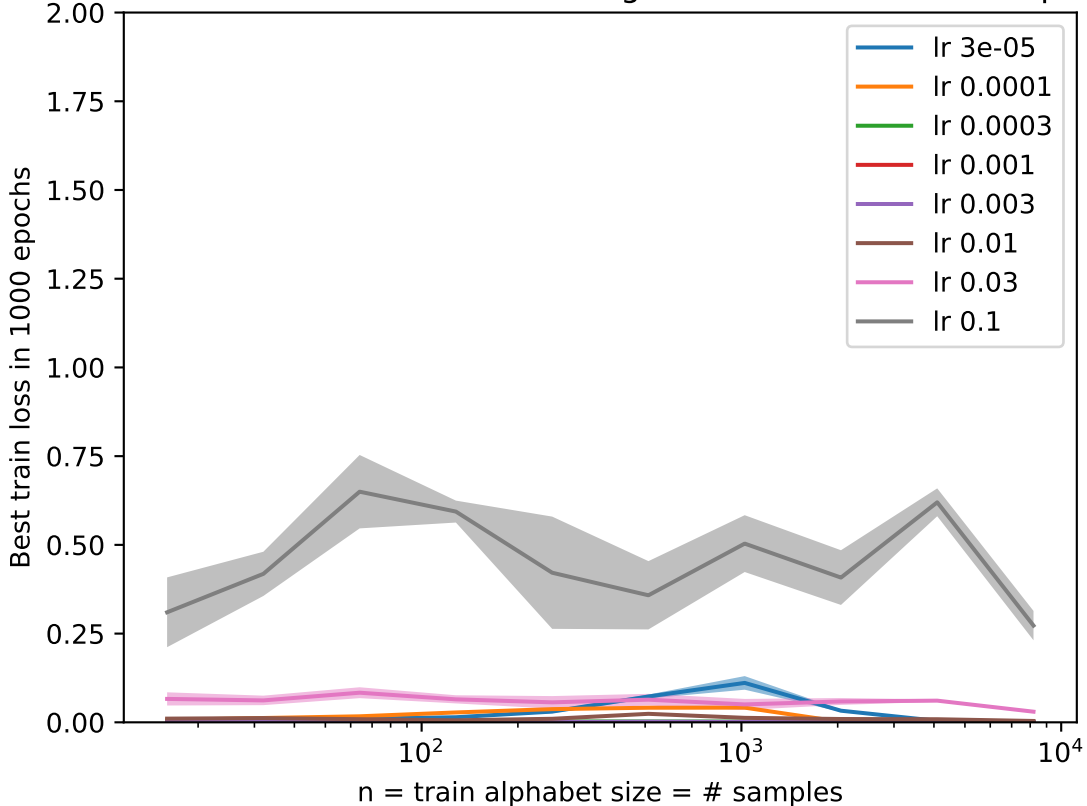

Supplement: supplementary_material [file attachment]

$W_K W_Q^T$  in Layer 7, Head 12 of GPT-2

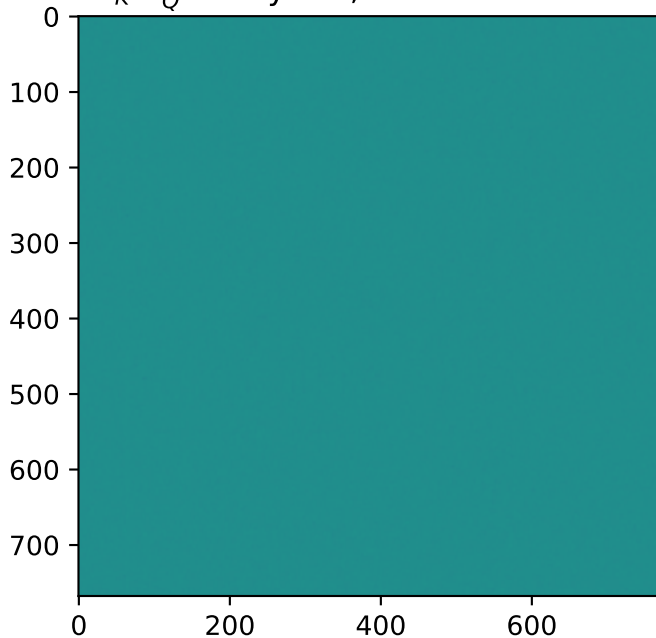

Supplement: supplementary_material [file attachment]

$W_V W_O^T$  in Layer 3, Head 3 of GPT-2

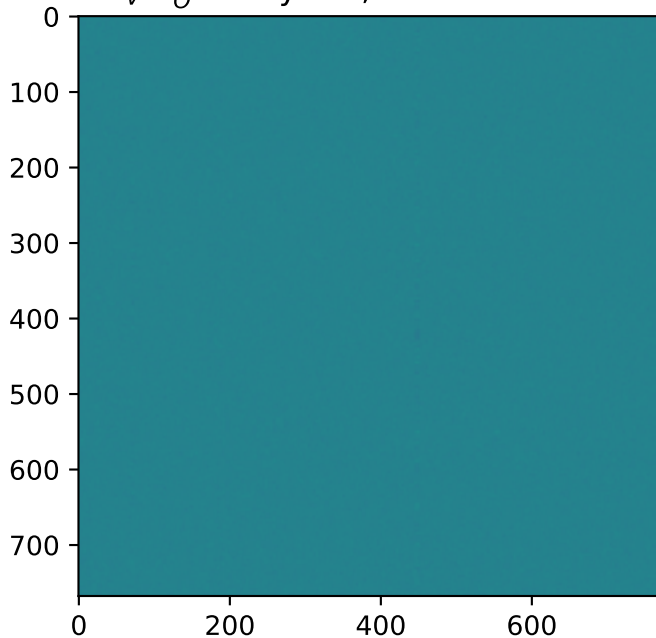

Supplement: supplementary_material [file attachment]

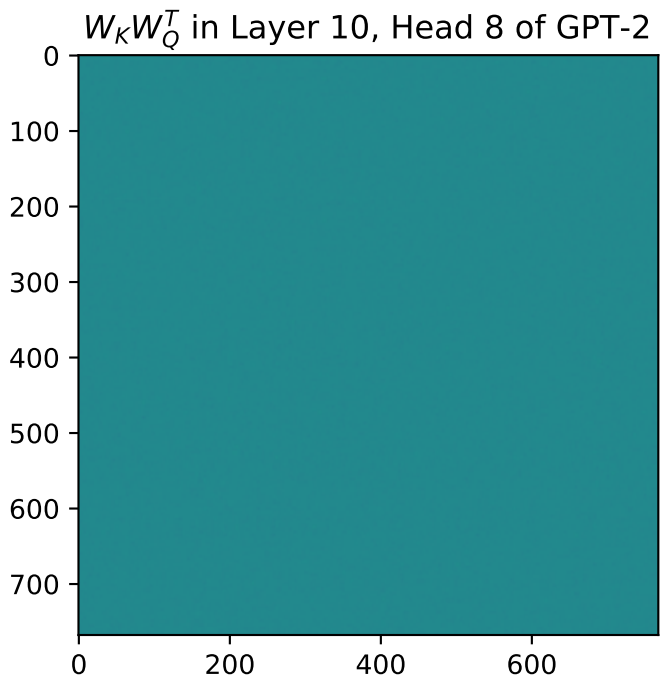

Supplement: supplementary_material [file attachment]

Transformer train loss vs. learning rate and depth, at  $n = 1024$

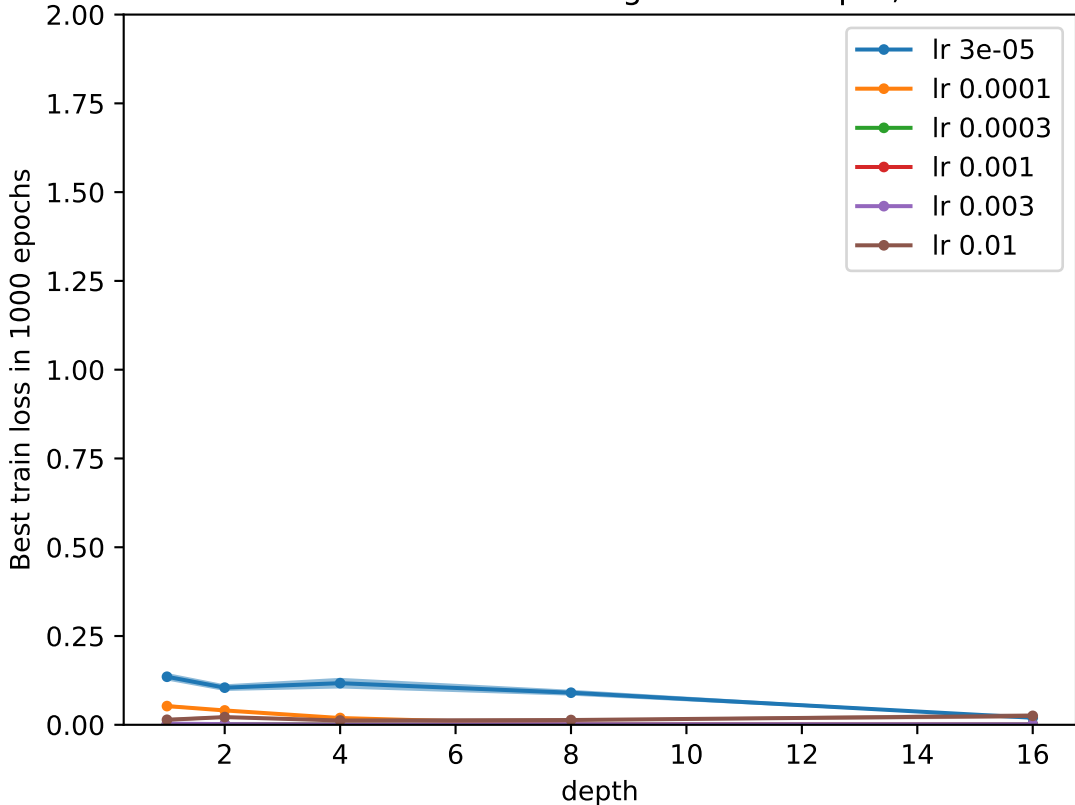

Supplement: supplementary_material [file attachment]

$W_V W_O^T$  in Layer 4, Head 12 of GPT-2

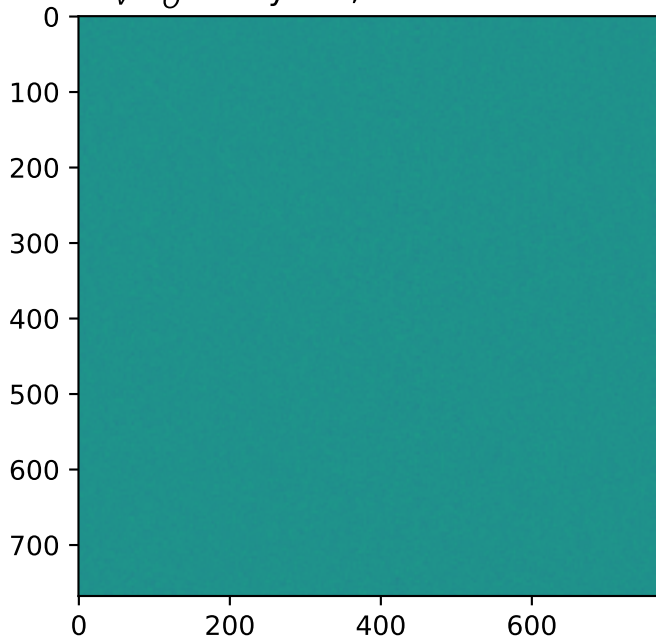

Supplement: supplementary_material [file attachment]

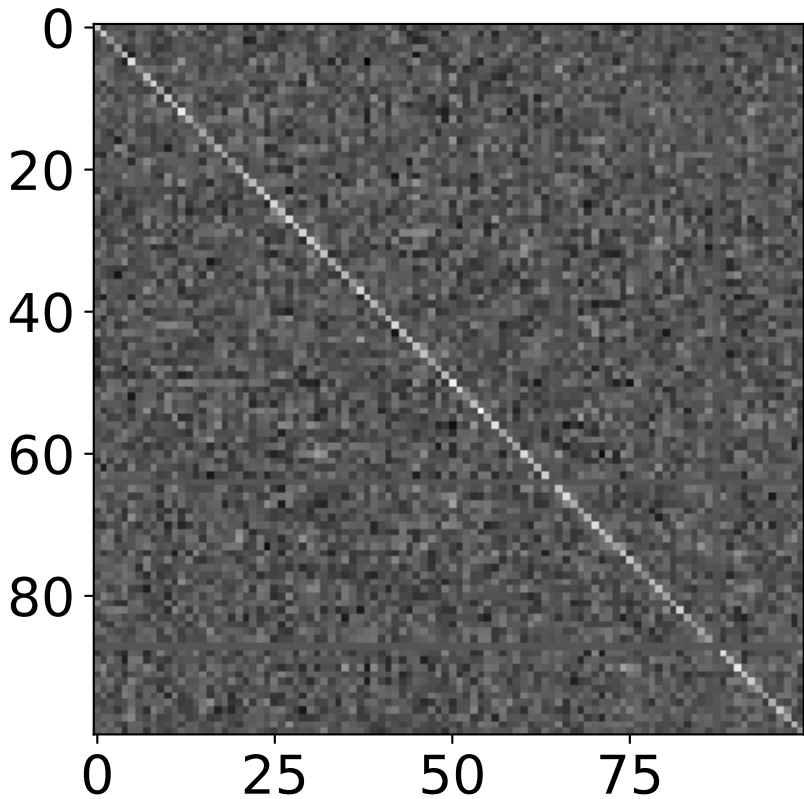

Supplement: supplementary_material [file attachment]

$W_K W_Q^T$  in Layer 4, Head 6 of GPT-2

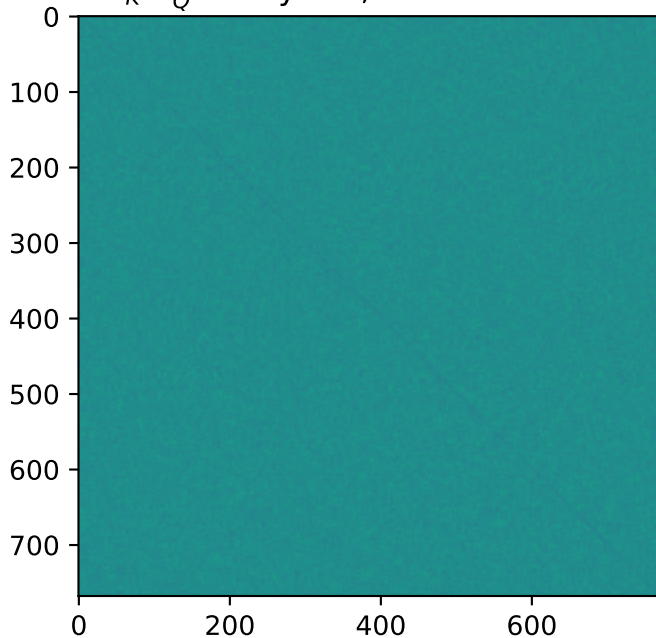

Supplement: supplementary_material [file attachment]

$W_K W_Q^T$  in Layer 1, Head 7 of GPT-2

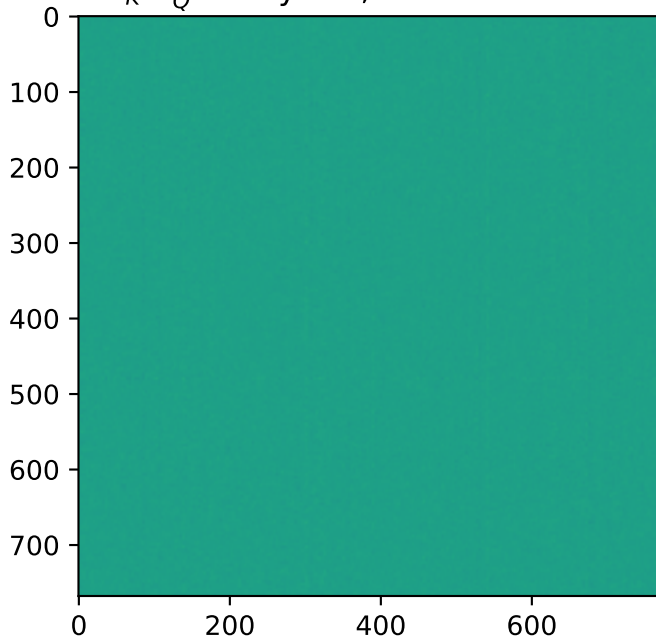

Supplement: supplementary_material [file attachment]

$W_K W_Q^T$  in Layer 6, Head 7 of GPT-2

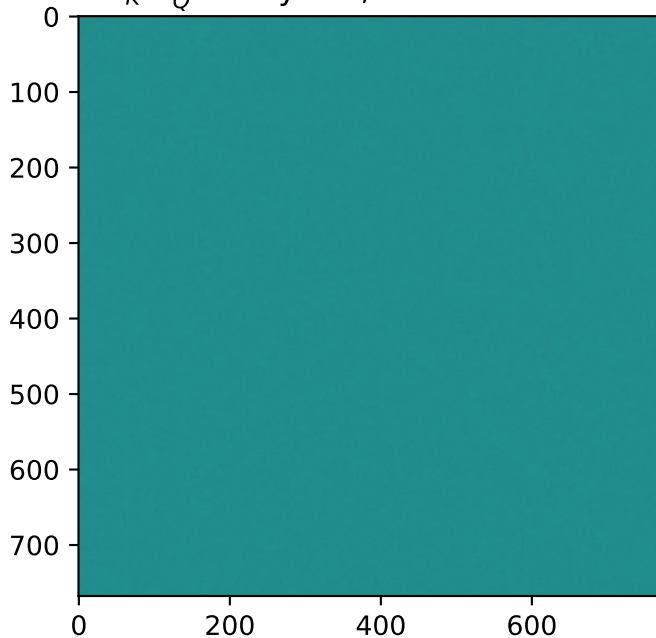

Supplement: supplementary_material [file attachment]

Transformer train loss on random tasks with different numbers of templates

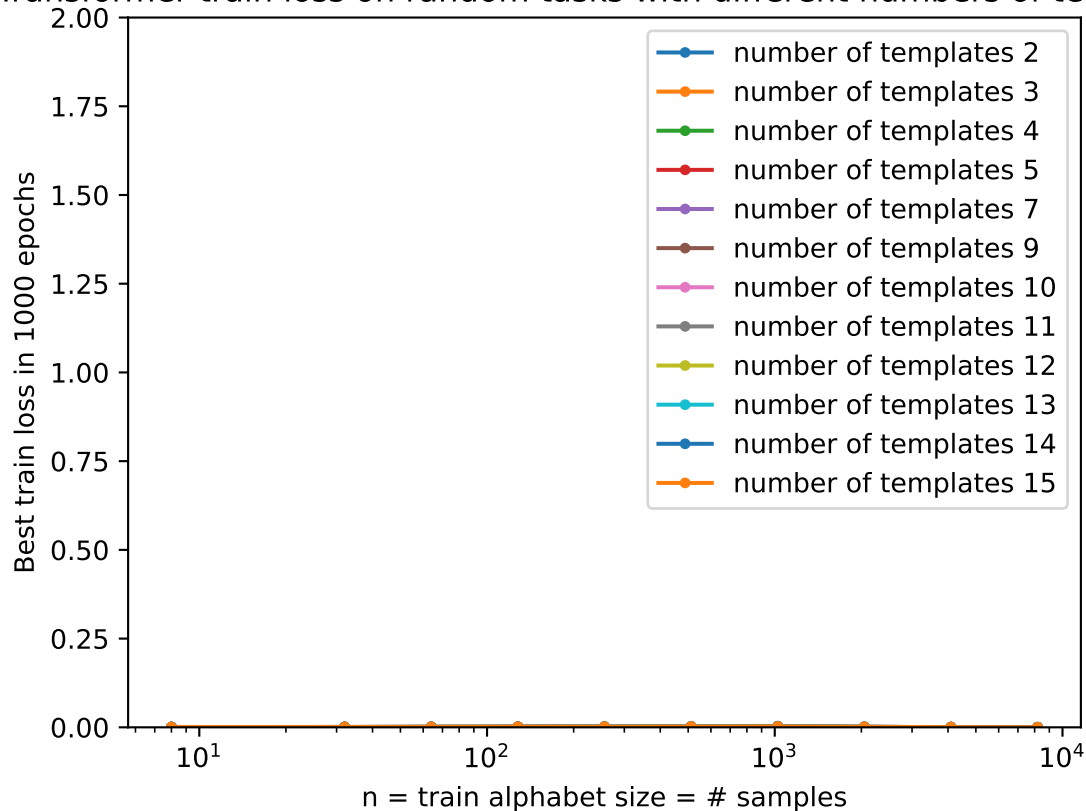

Supplement: supplementary_material [file attachment]

$W_K W_Q^T$  in Layer 11, Head 11 of GPT-2

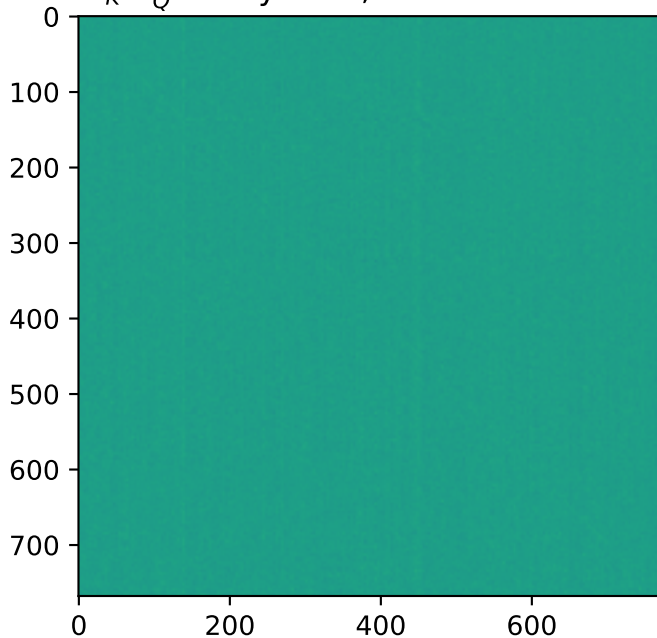

Supplement: supplementary_material [file attachment]



Supplement: supplementary_material [file attachment]

$W_K W_Q^T$  in Layer 3, Head 11 of GPT-2

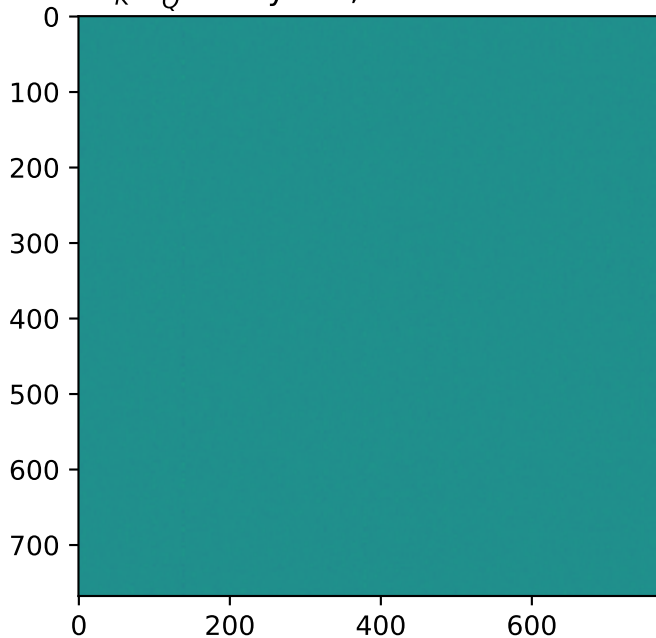

Supplement: supplementary_material [file attachment]

$W_K W_Q^T$  in Layer 12, Head 6 of GPT-2

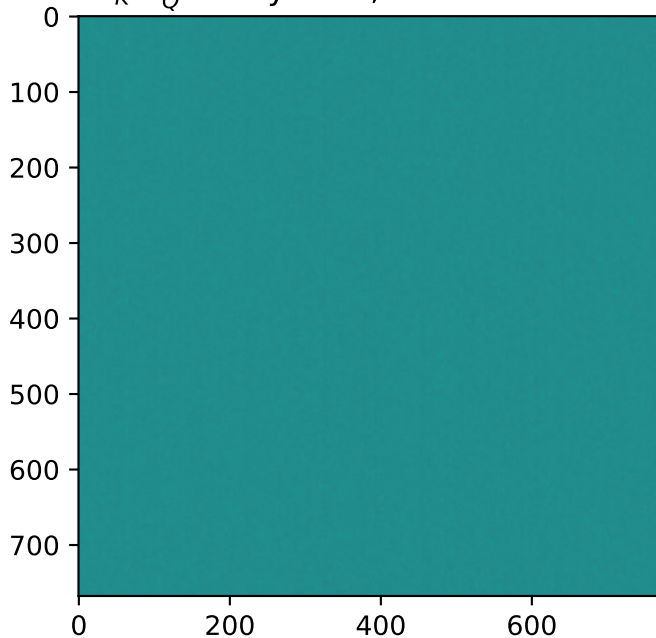

Supplement: supplementary_material [file attachment]

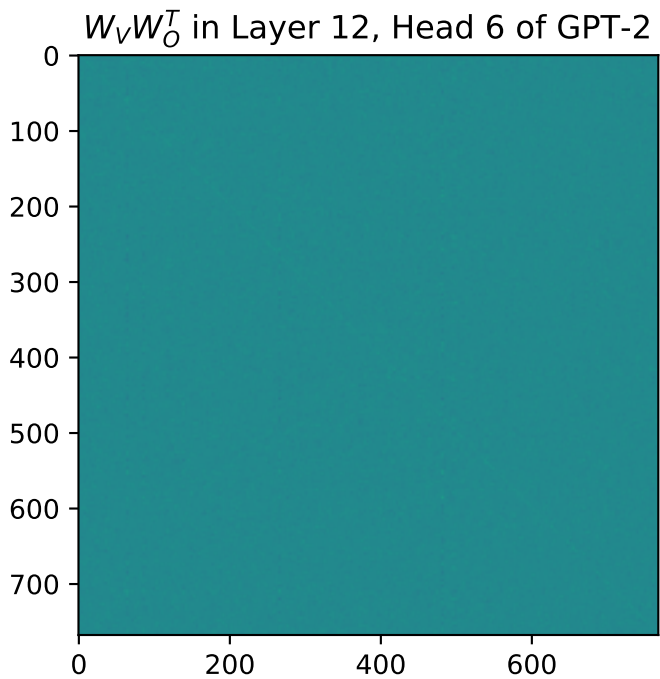

Supplement: supplementary_material [file attachment]

$W_K W_Q^T$  in Layer 2, Head 6 of GPT-2

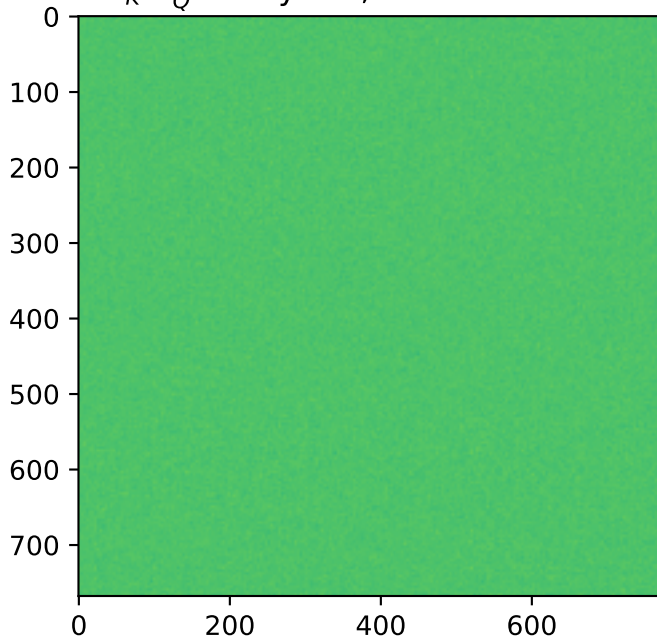

Supplement: supplementary_material [file attachment]

$W_V W_O^T$  in Layer 2, Head 6 of GPT-2

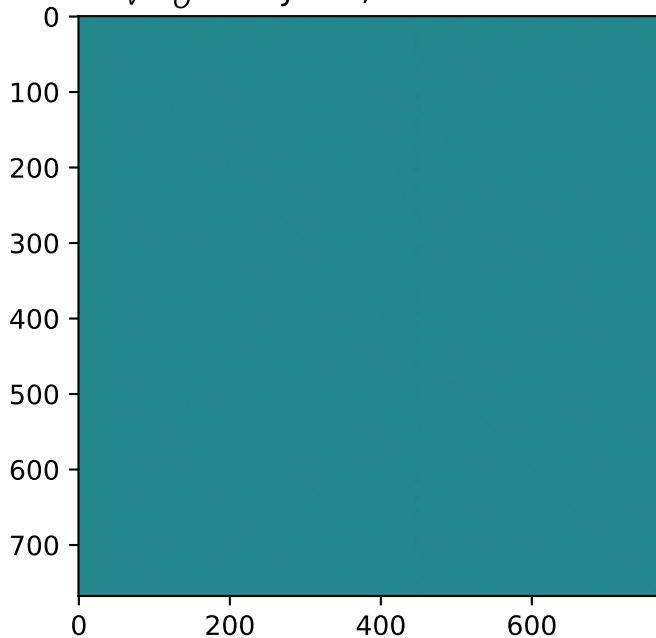

Supplement: supplementary_material [file attachment]
