# Supplementary material (part 2 of 4)
Source: ML conference proceedings conference paper supplement (https://openreview.net/forum?id=STUGfUz8ob)

$W_K W_Q^T$  in Layer 9, Head 1 of GPT-2

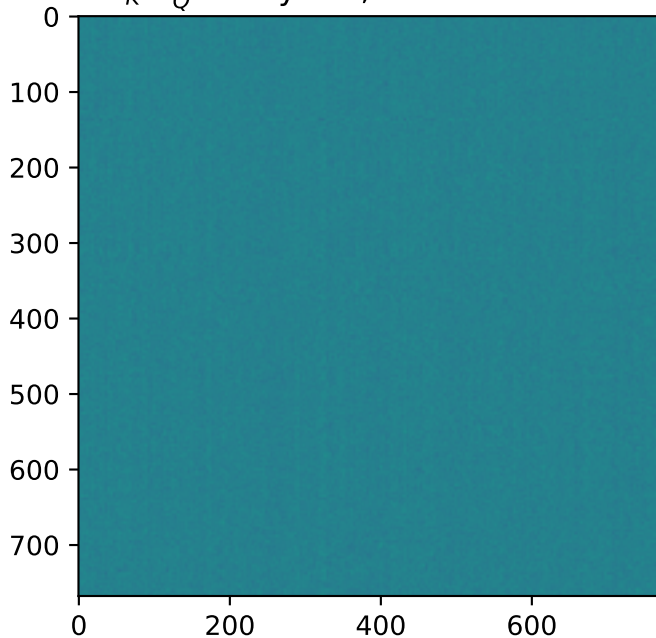

Supplement: supplementary_material [file attachment]

$W_K W_Q^T$  in Layer 5, Head 3 of GPT-2

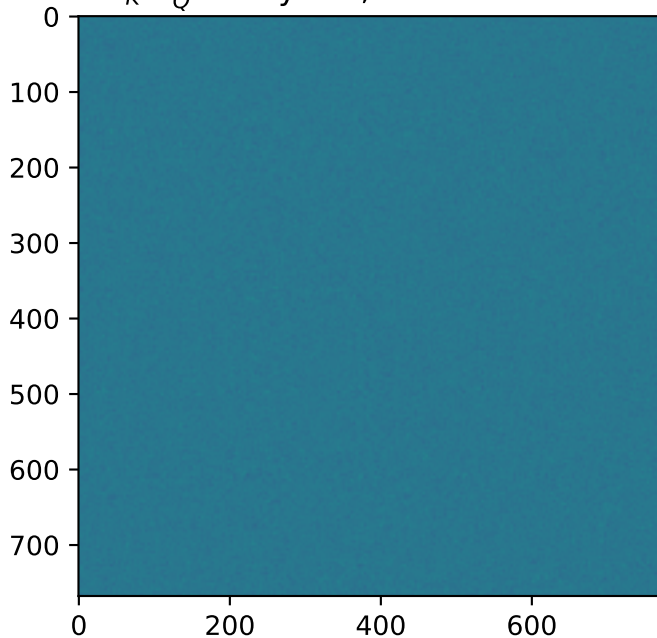

Supplement: supplementary_material [file attachment]

$W_K W_Q^T$  in Layer 6, Head 1 of GPT-2

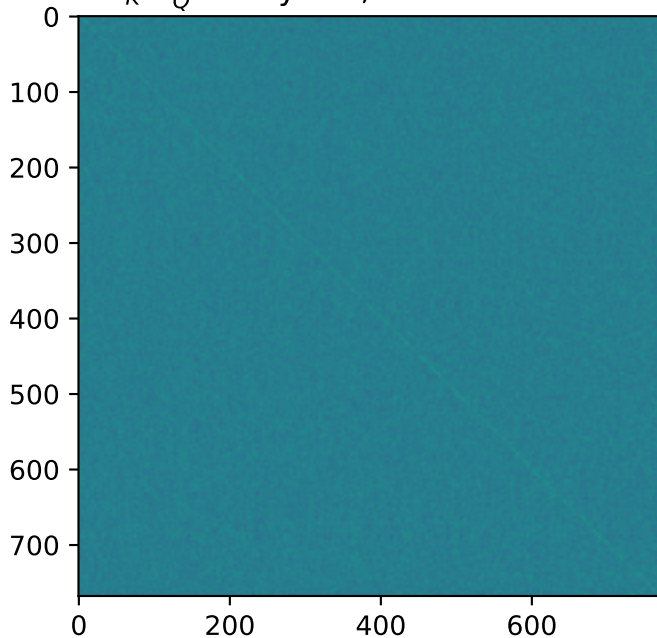

Supplement: supplementary_material [file attachment]

Transformer train loss vs. learning rate and embedding dimension, at  $n = 1024$

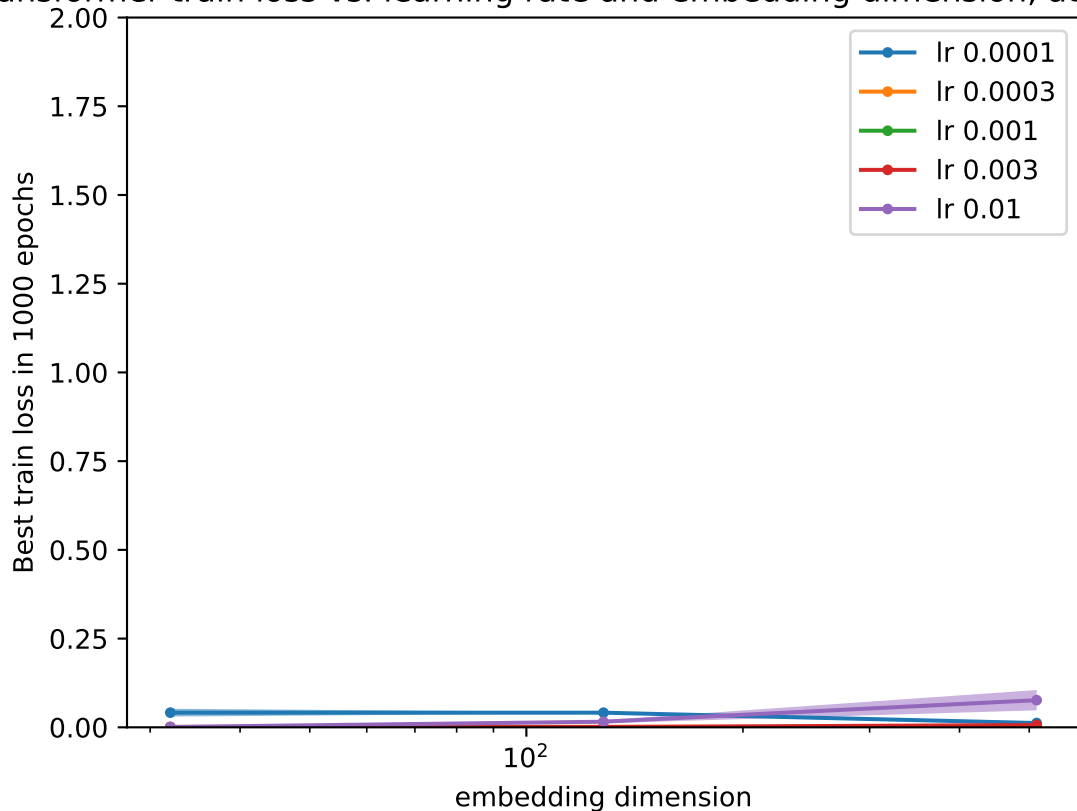

Supplement: supplementary_material [file attachment]

Transformer train loss vs. learning rate and number of heads, at  $n = 512$

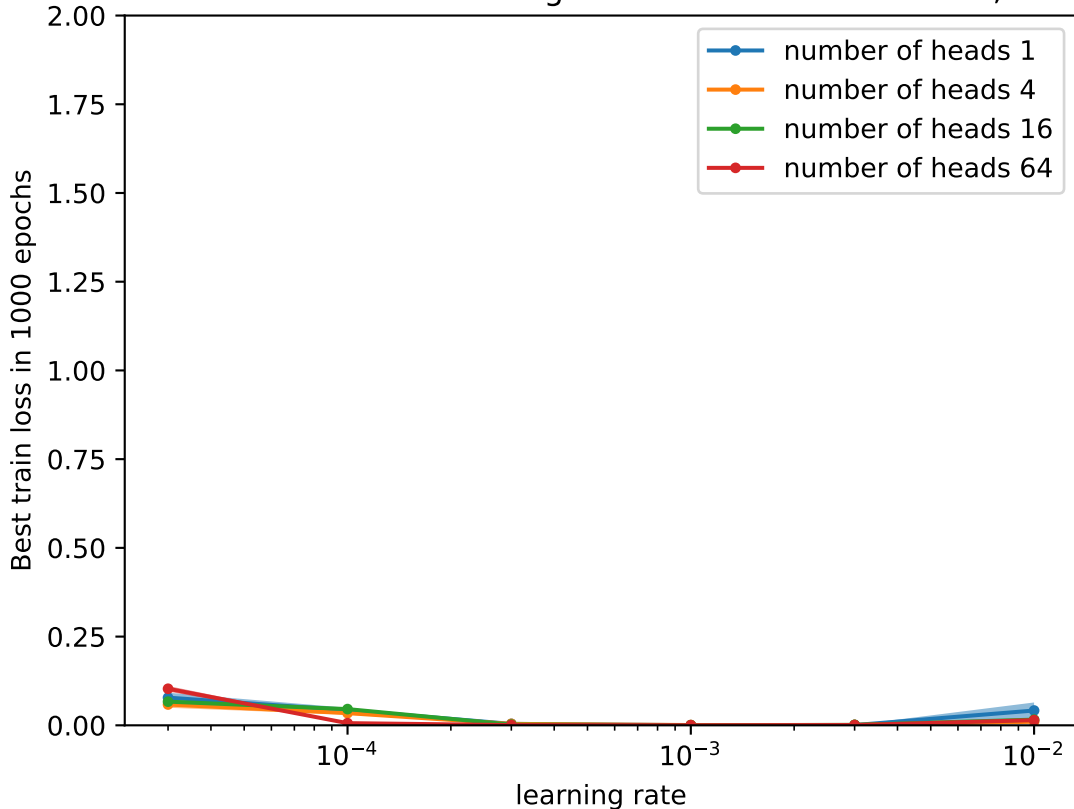

Supplement: supplementary_material [file attachment]

$W_K W_Q^T$  in Layer 3, Head 10 of GPT-2

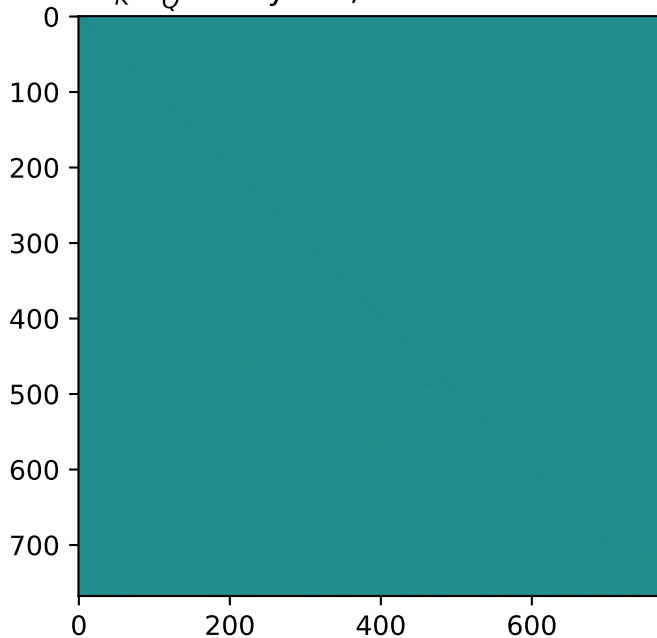

Supplement: supplementary_material [file attachment]

$W_K W_Q^T$  in Layer 2, Head 10 of GPT-2

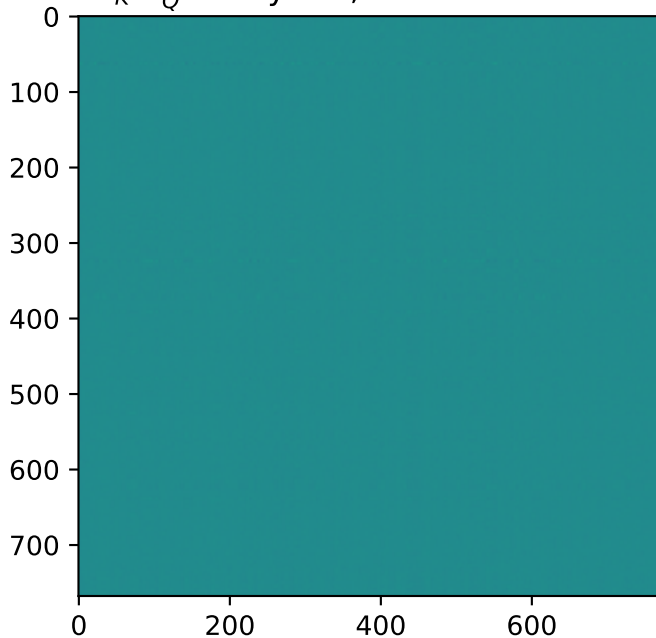

Supplement: supplementary_material [file attachment]

$W_V W_O^T$  in Layer 2, Head 11 of GPT-2

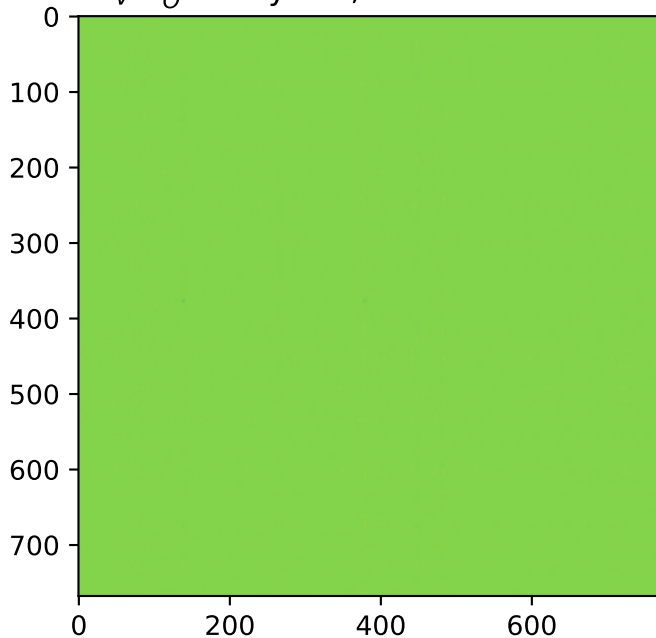

Supplement: supplementary_material [file attachment]

Train loss for FC net, depth=2

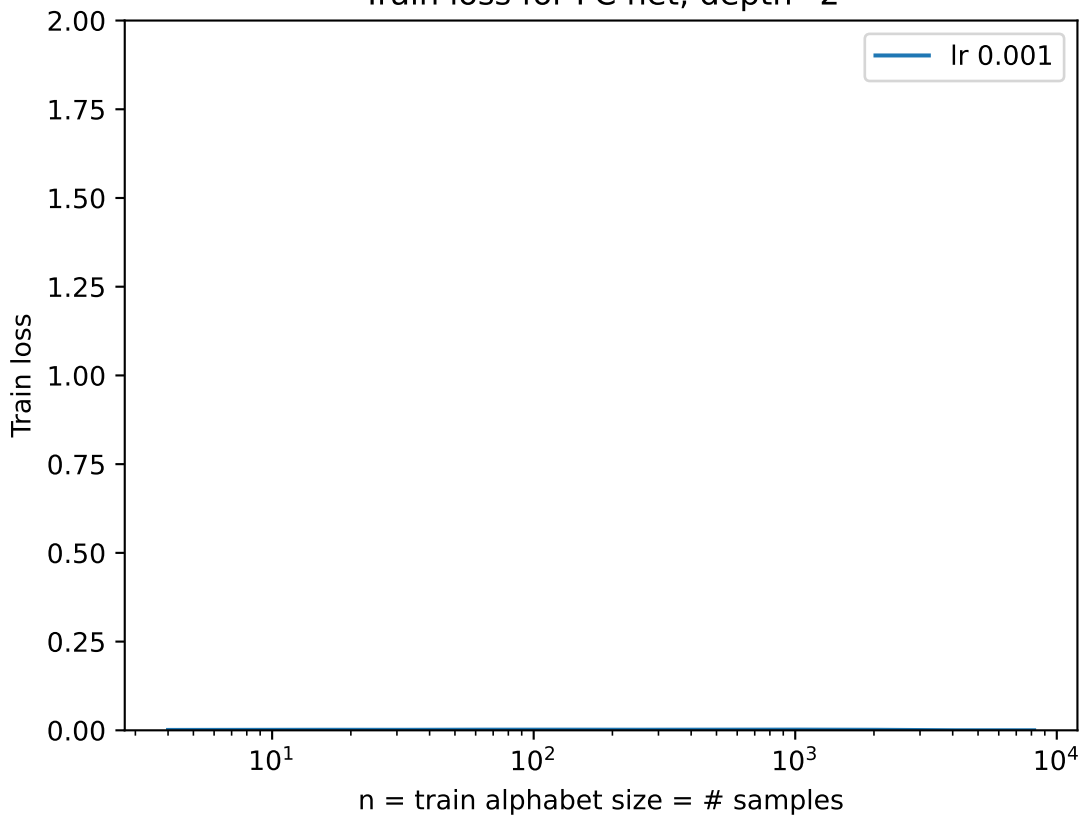

Supplement: supplementary_material [file attachment]

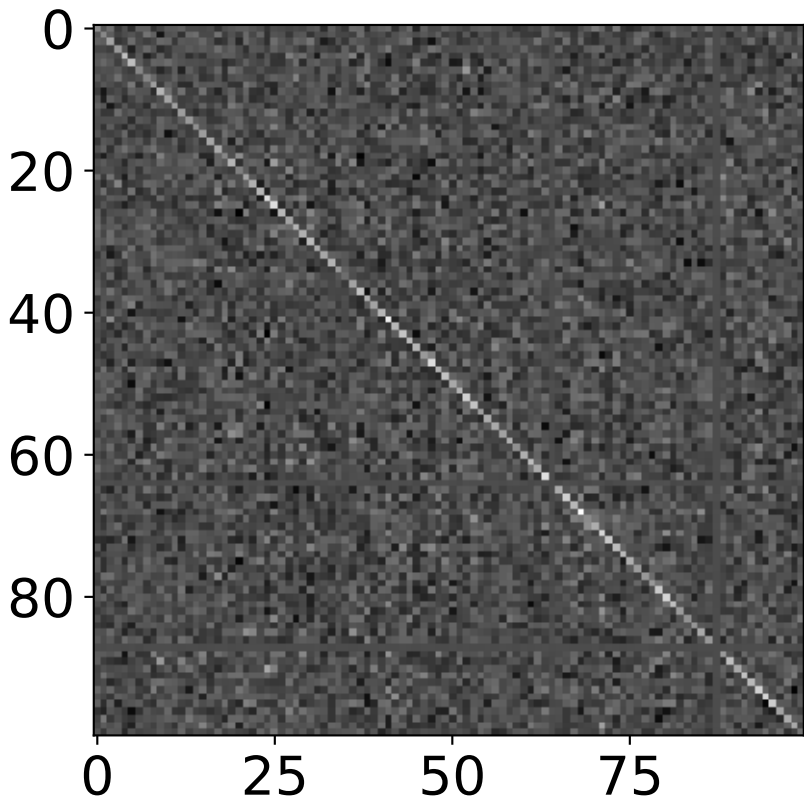

Supplement: supplementary_material [file attachment]

$W_K W_Q^T$  in Layer 2, Head 8 of GPT-2

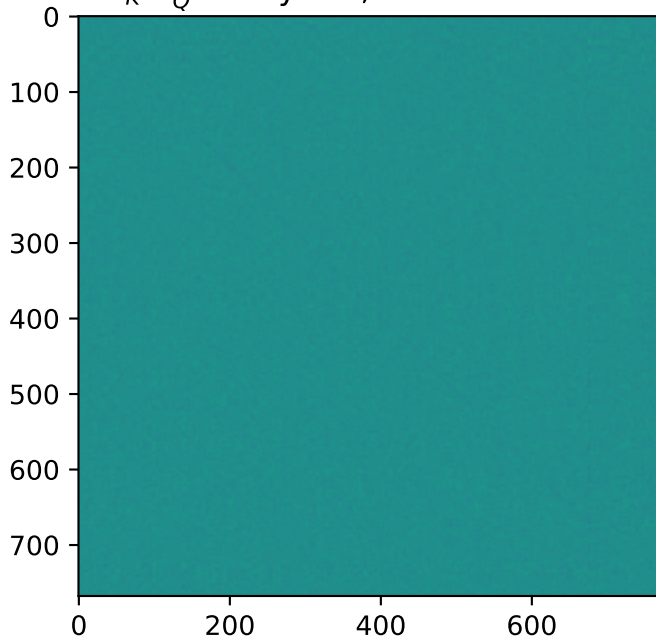

Supplement: supplementary_material [file attachment]

## Transformer test loss vs. learning rate and number of samples

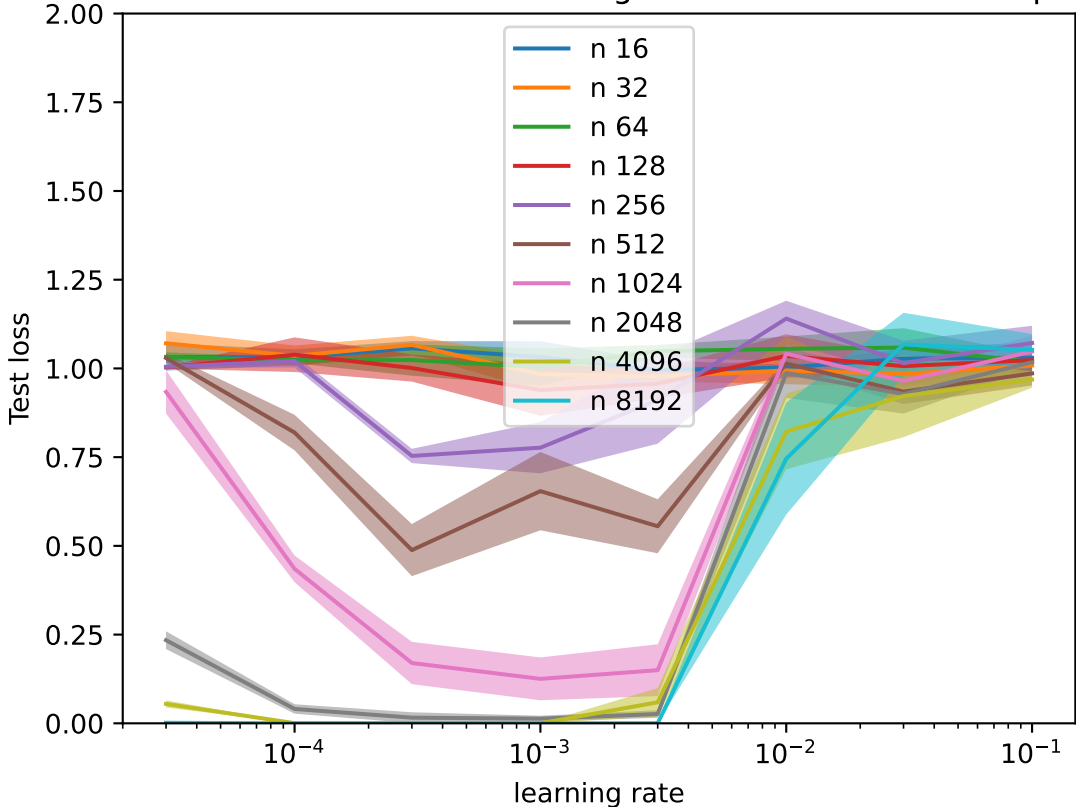

Supplement: supplementary_material [file attachment]

$W_K W_Q^T$  in Layer 1, Head 4 of GPT-2

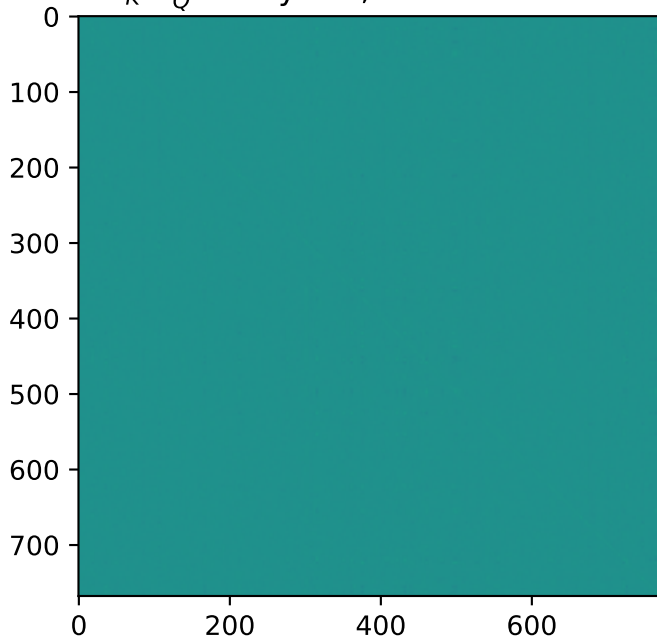

Supplement: supplementary_material [file attachment]

$W_K W_Q^T$  in Layer 8, Head 7 of GPT-2

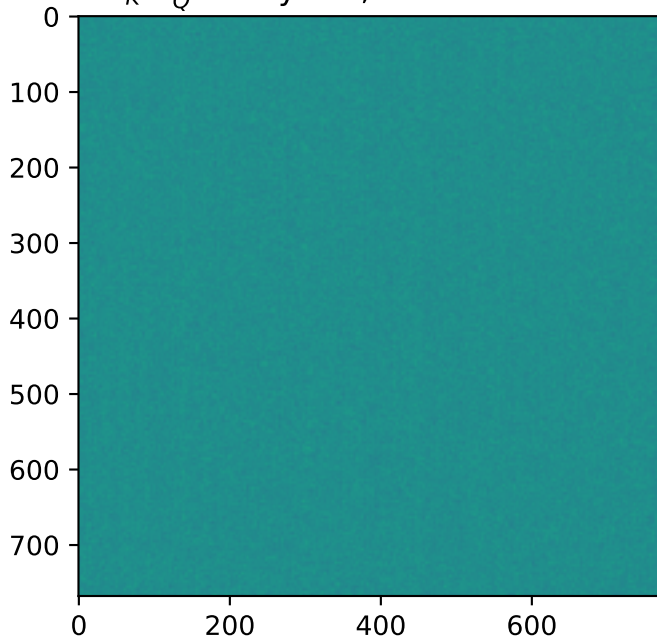

Supplement: supplementary_material [file attachment]

Transformer test loss on random tasks with different lengths

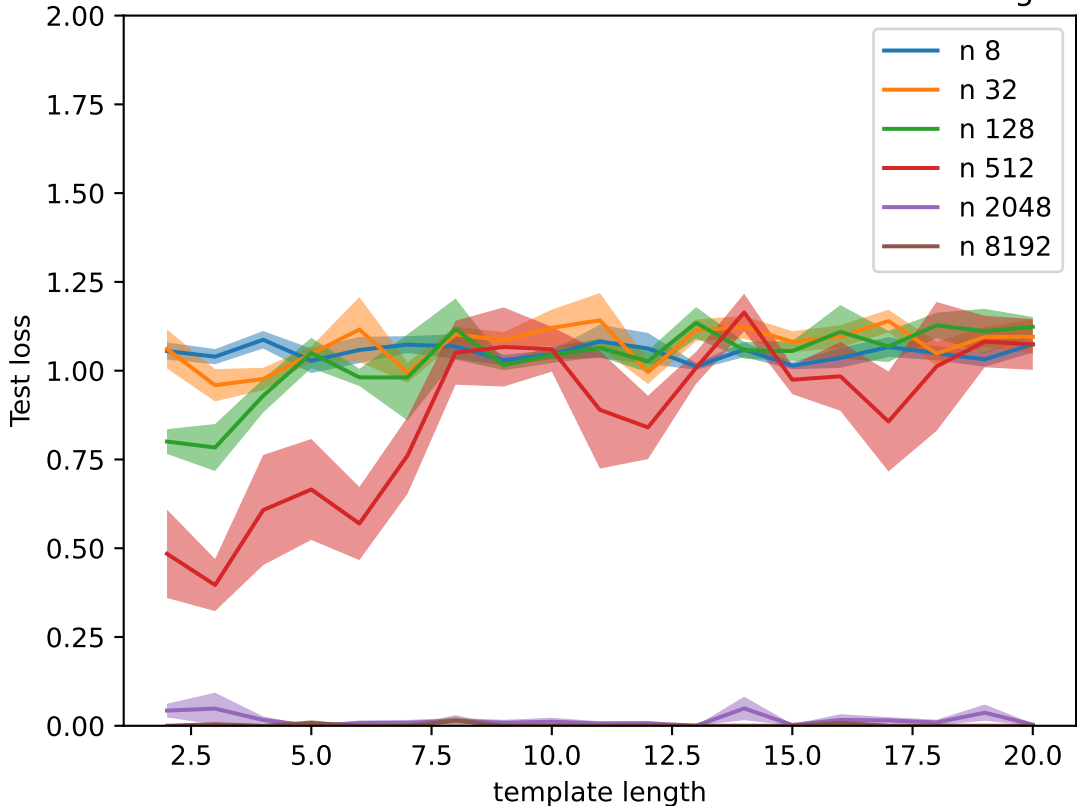

Supplement: supplementary_material [file attachment]

$W_K W_Q^T$  in Layer 5, Head 6 of GPT-2

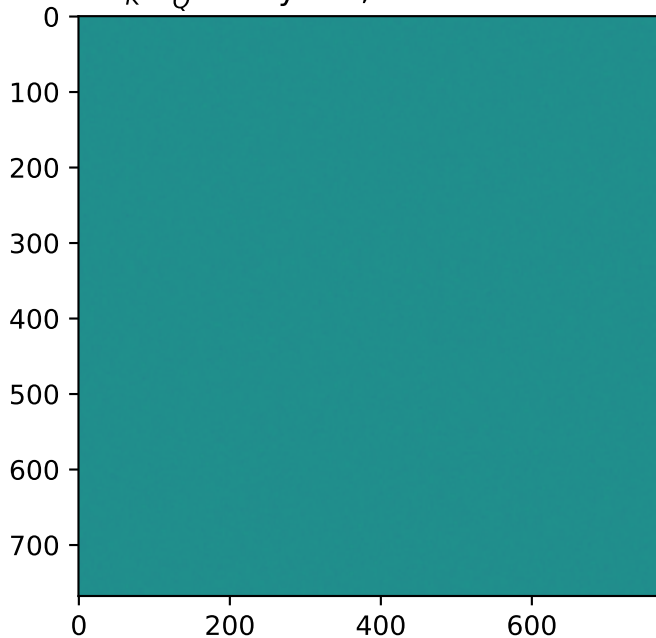

Supplement: supplementary_material [file attachment]

GPT-2 pretrained by size, test loss

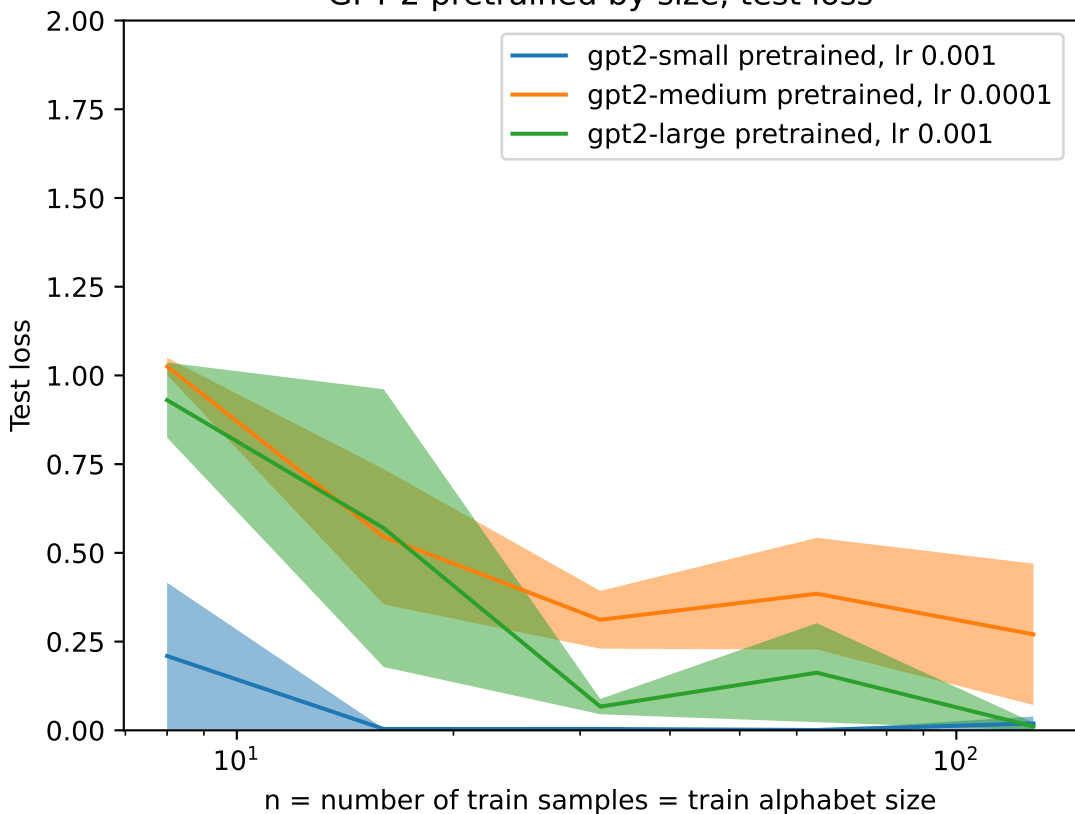

Supplement: supplementary_material [file attachment]

$W_K W_Q^T$  in Layer 2, Head 5 of GPT-2

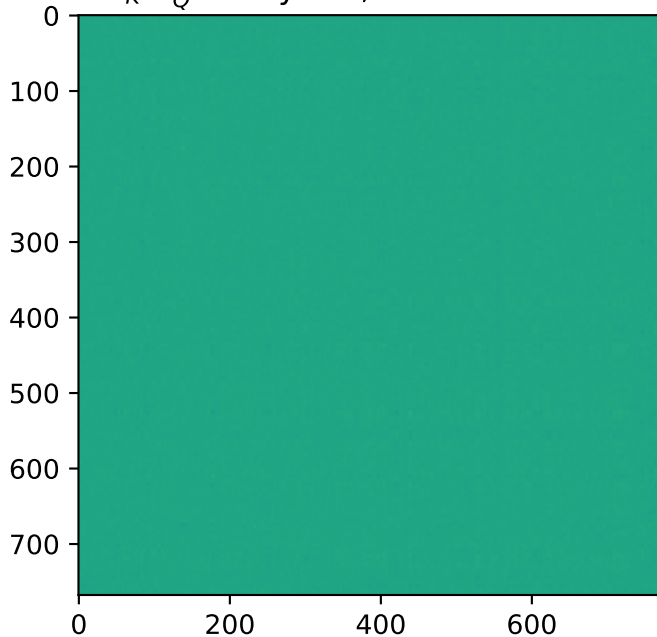

Supplement: supplementary_material [file attachment]

Transformer test loss vs. learning rate and number of samples

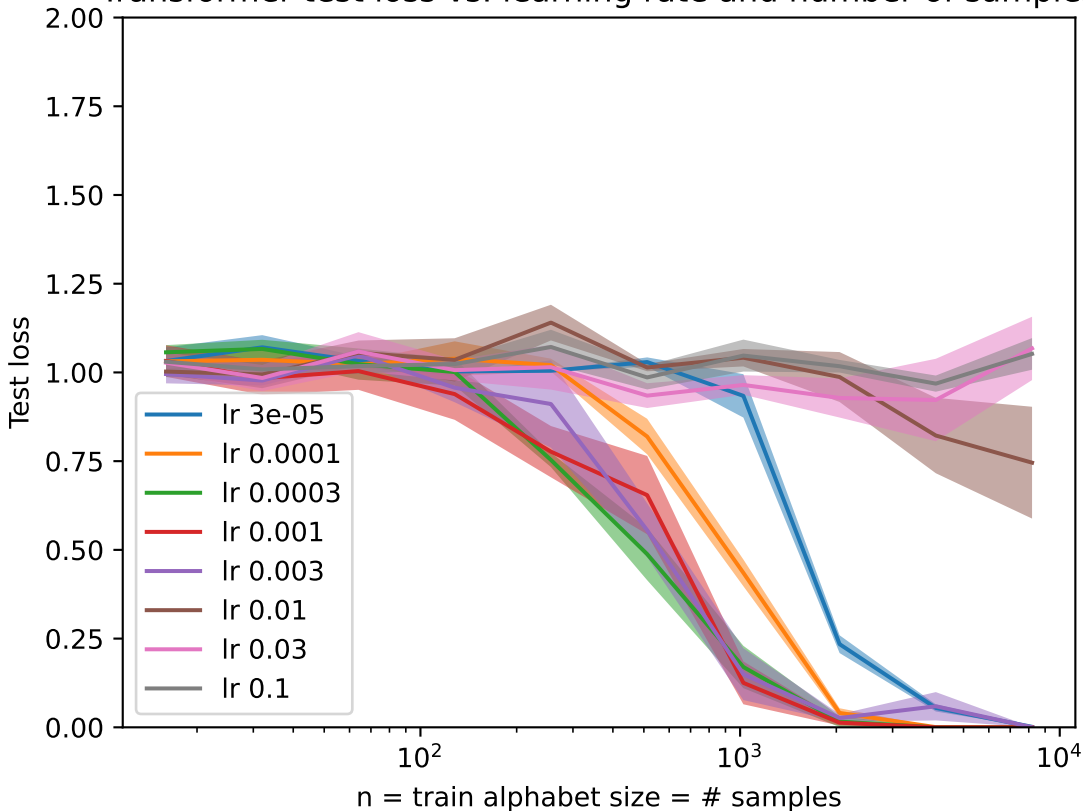

Supplement: supplementary_material [file attachment]

$W_V W_O^T$  in Layer 6, Head 7 of GPT-2

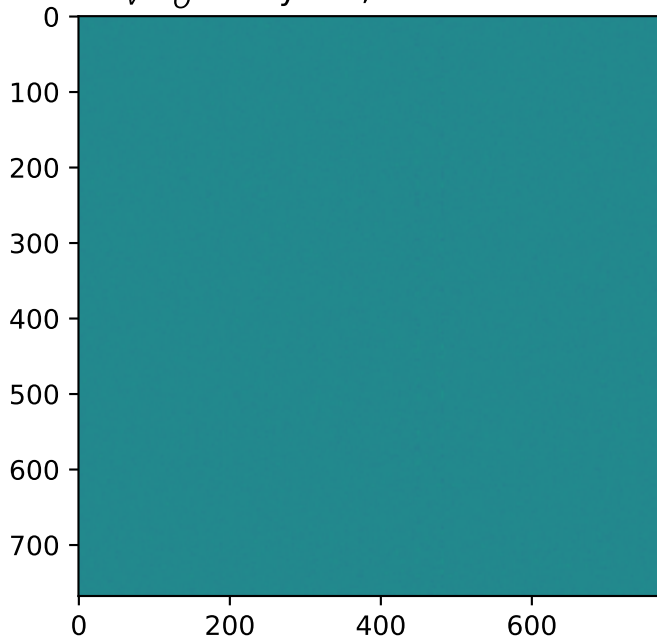

Supplement: supplementary_material [file attachment]

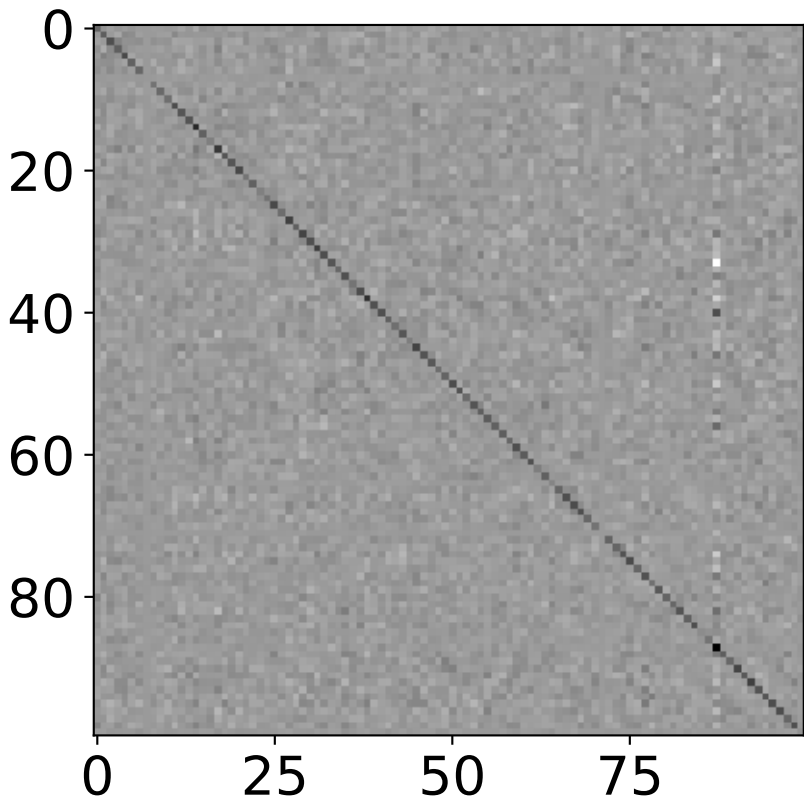

Supplement: supplementary_material [file attachment]

$W_V W_O^T$  in Layer 10, Head 8 of GPT-2

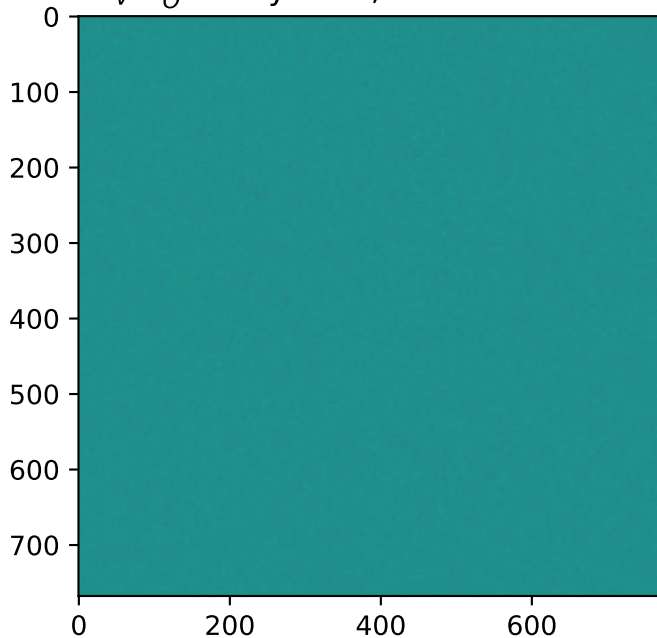

Supplement: supplementary_material [file attachment]

$W_K W_Q^T$  in Layer 4, Head 7 of GPT-2

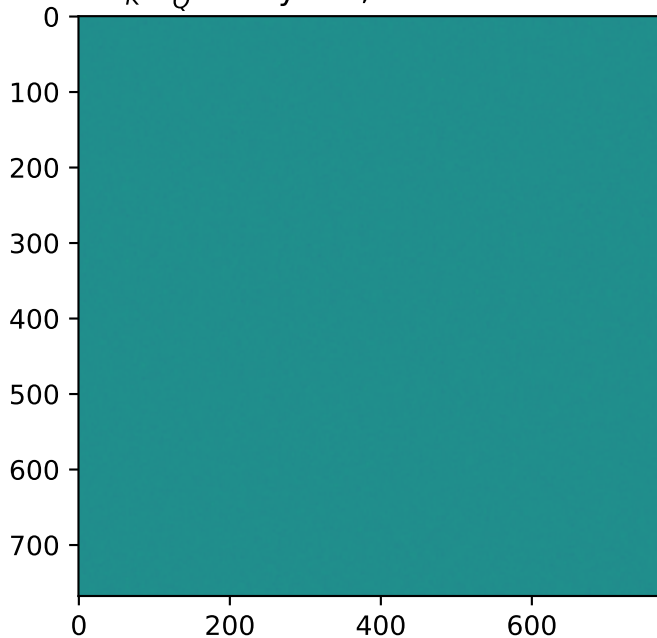

Supplement: supplementary_material [file attachment]

Transformer train loss on random tasks with different wildcard alphabet sizes

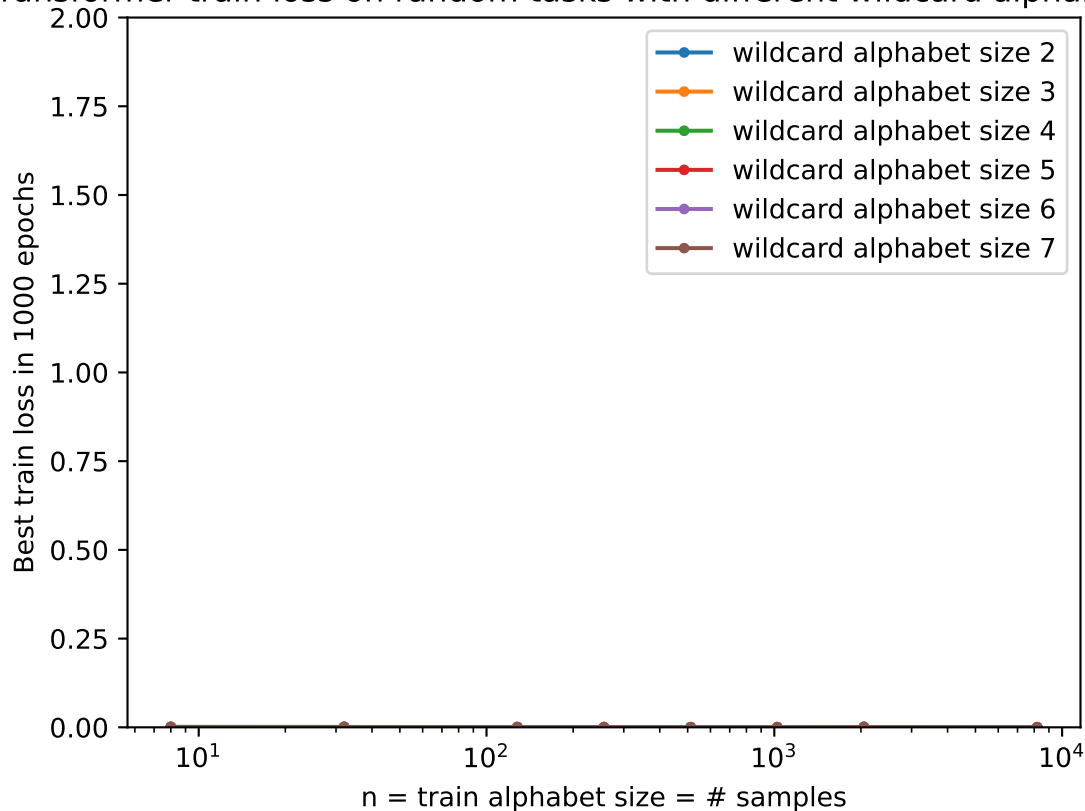

Supplement: supplementary_material [file attachment]

$W_K W_Q^T$  in Layer 5, Head 9 of GPT-2

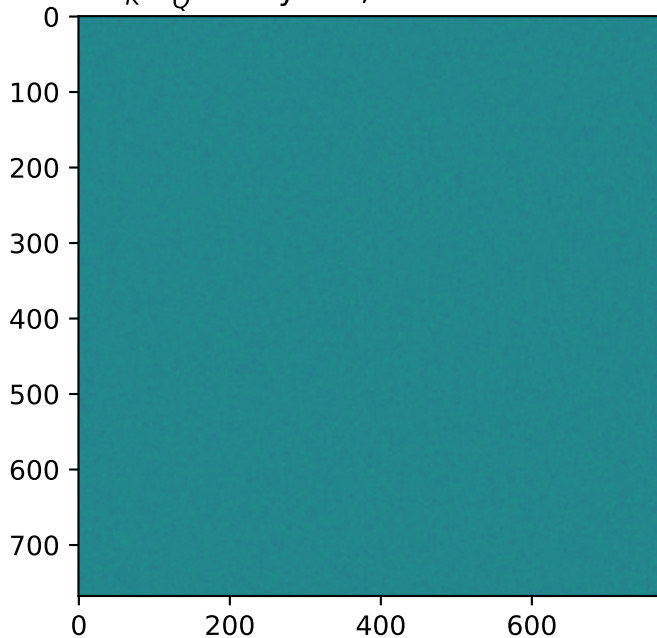

Supplement: supplementary_material [file attachment]

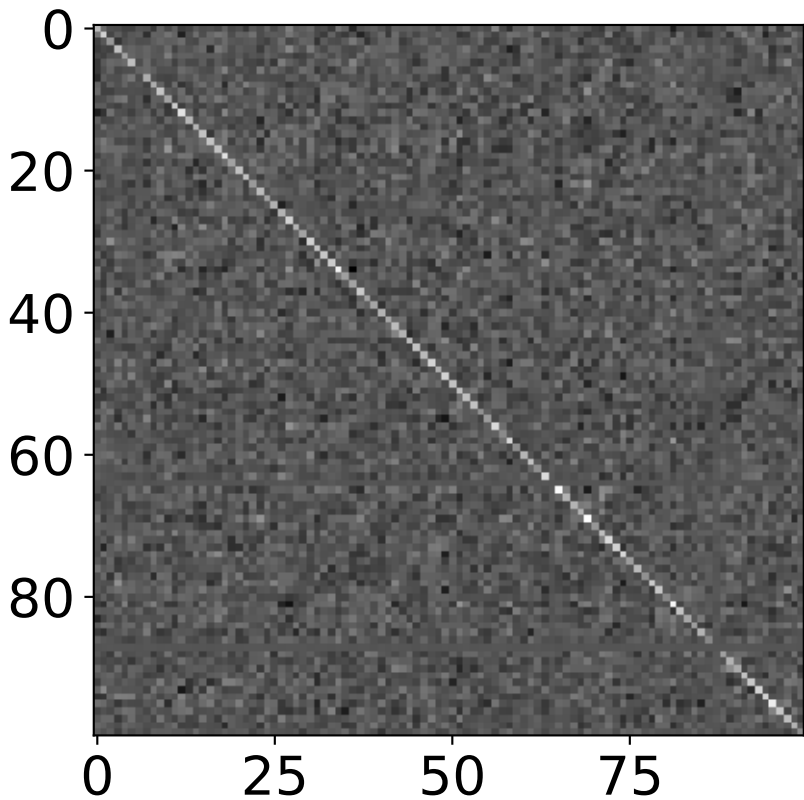

Supplement: supplementary_material [file attachment]

$W_V W_O^T$  in Layer 2, Head 3 of GPT-2

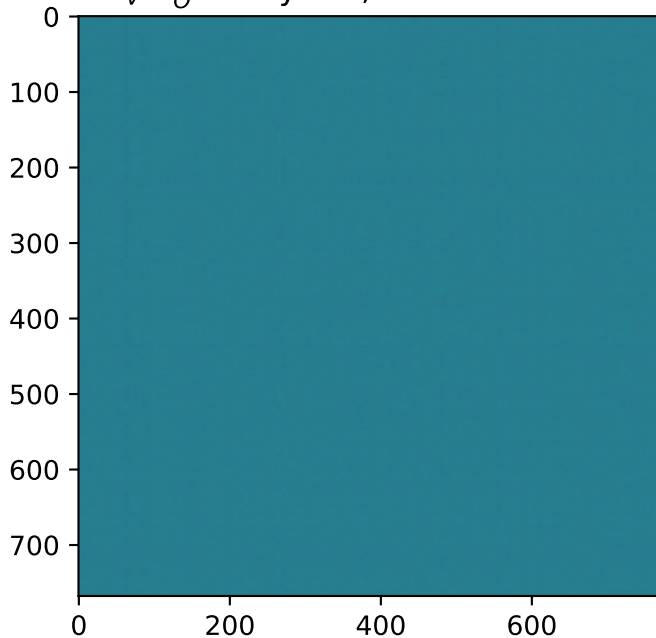

Supplement: supplementary_material [file attachment]

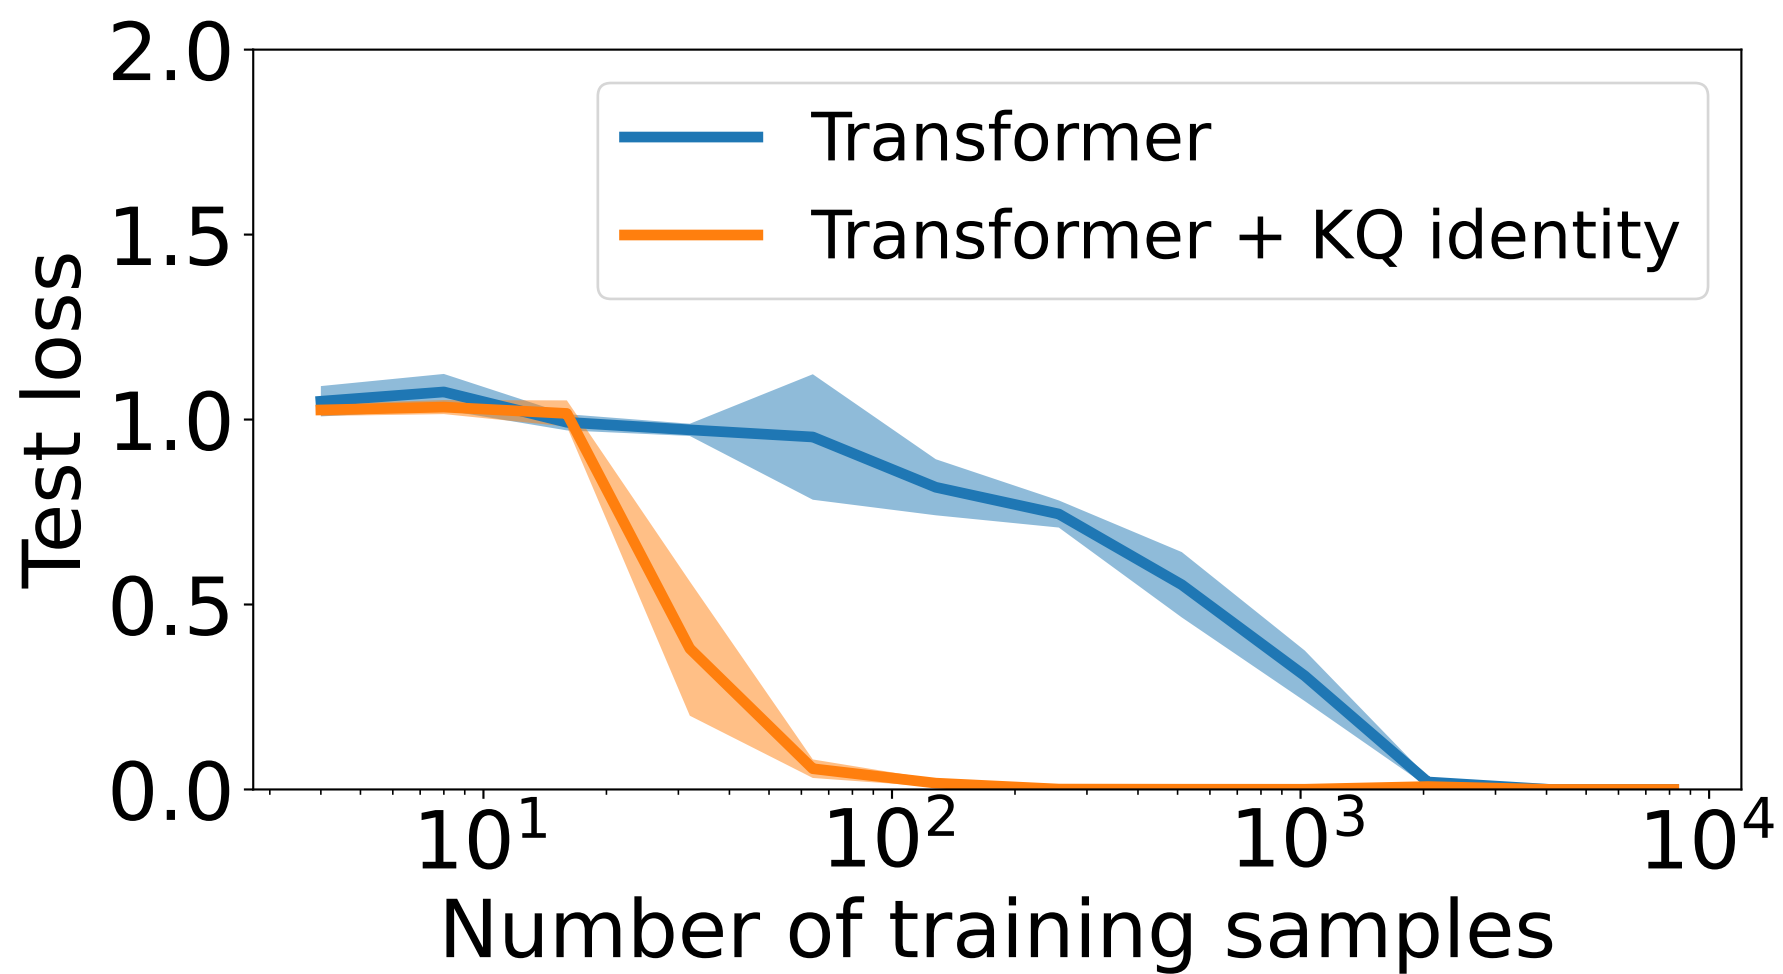

Supplement: supplementary_material [file attachment]

Transformer test loss vs. learning rate and number of heads, at  $n = 1024$

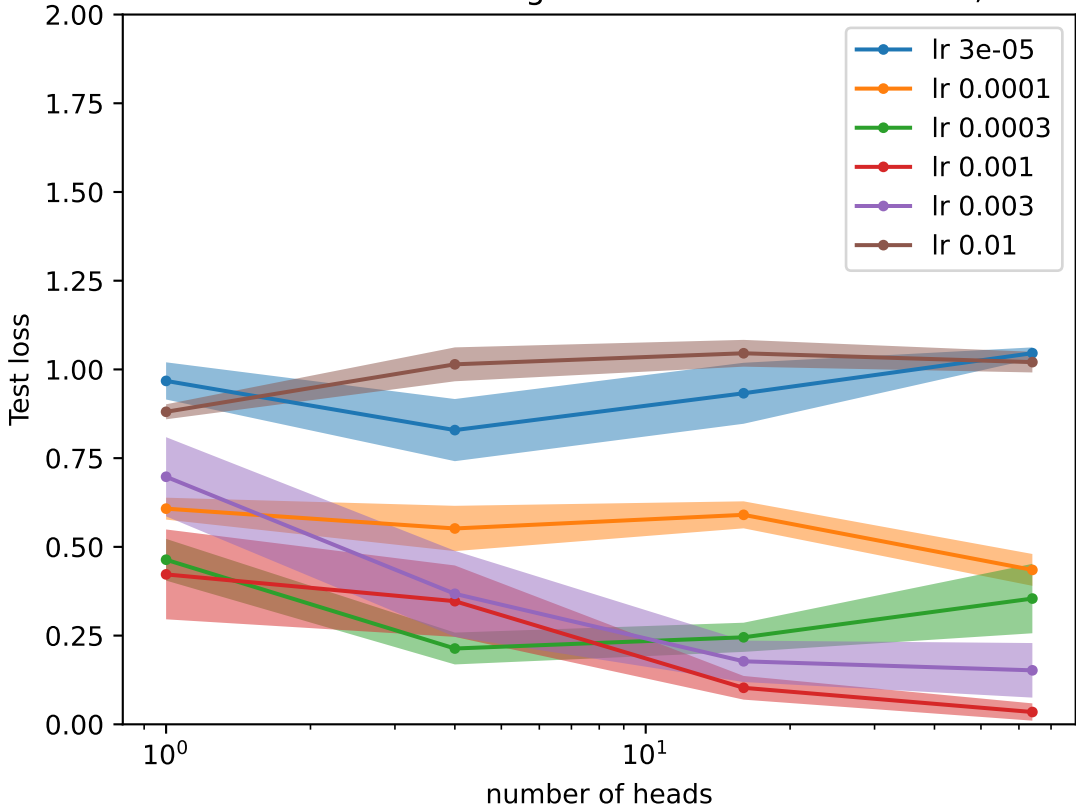

Supplement: supplementary_material [file attachment]

$W_V W_O^T$  in Layer 3, Head 4 of GPT-2

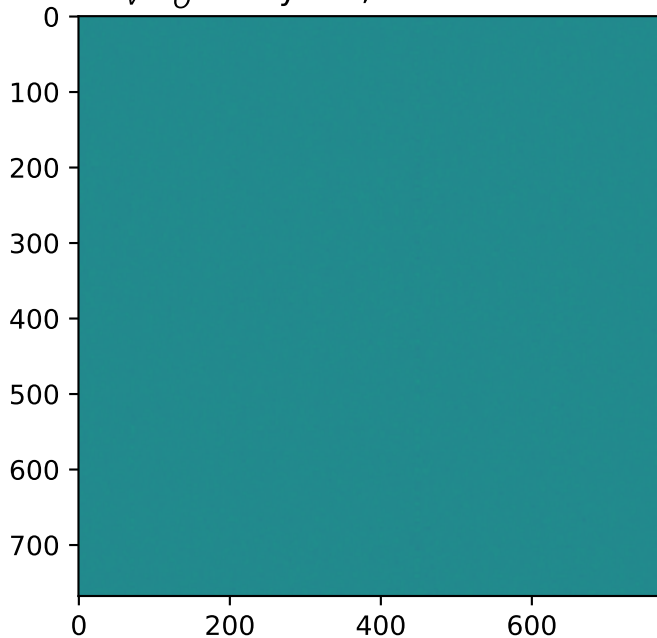

Supplement: supplementary_material [file attachment]

$W_K W_Q^T$  in Layer 4, Head 8 of GPT-2

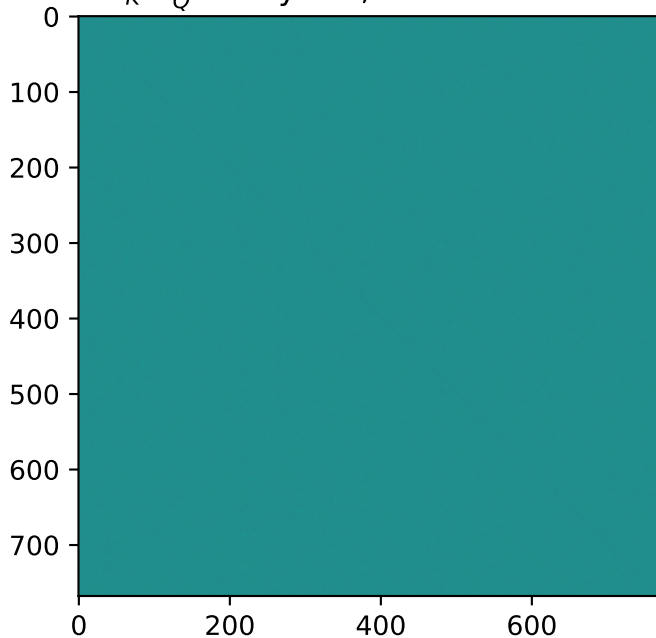

Supplement: supplementary_material [file attachment]

$W_K W_Q^T$  in Layer 2, Head 9 of GPT-2

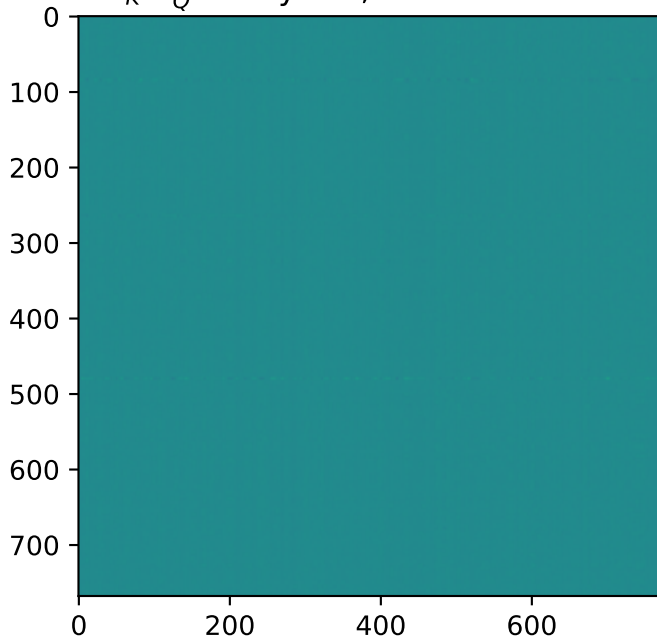

Supplement: supplementary_material [file attachment]

$W_V W_O^T$  in Layer 9, Head 10 of GPT-2

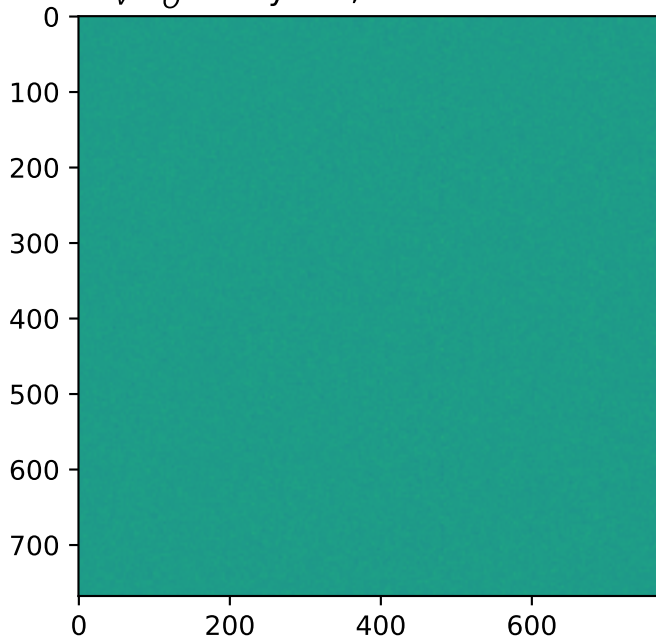

Supplement: supplementary_material [file attachment]

$W_V W_O^T$  in Layer 4, Head 10 of GPT-2

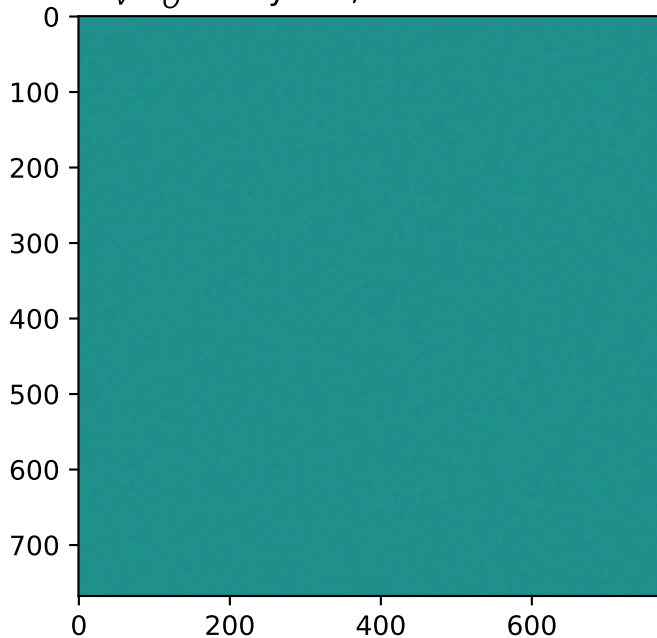

Supplement: supplementary_material [file attachment]

Comparison of architectures, test loss

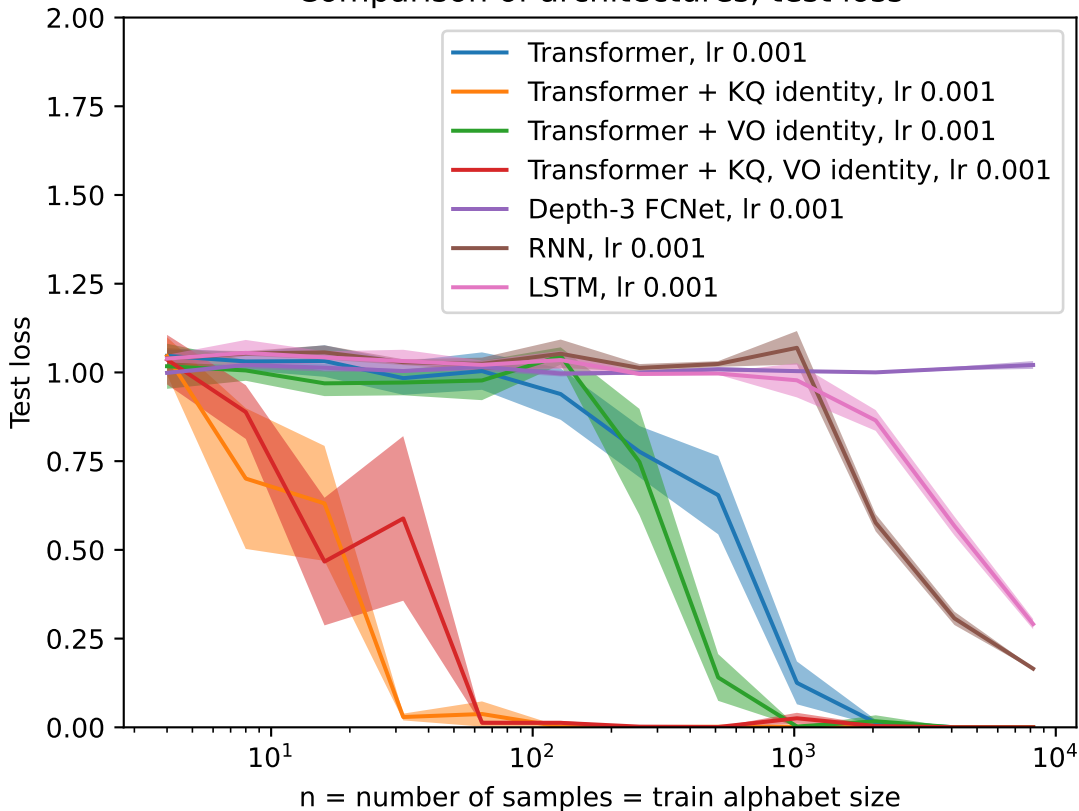

Supplement: supplementary_material [file attachment]

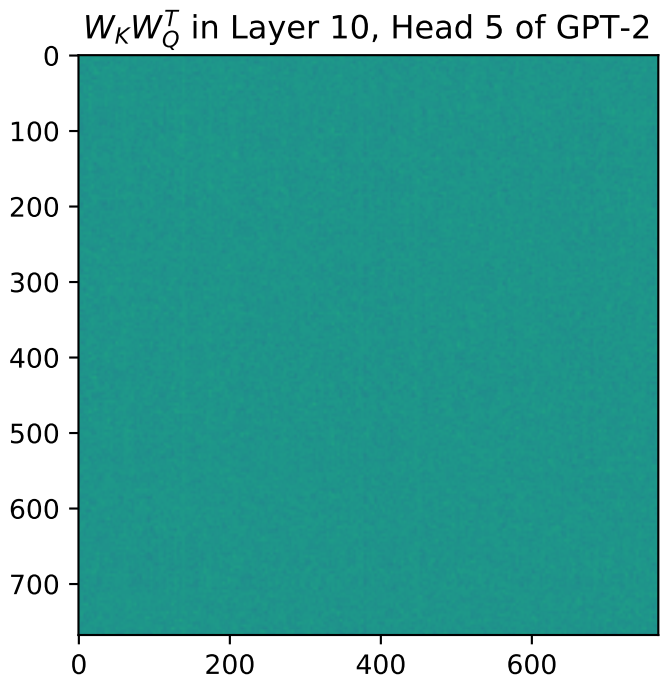

Supplement: supplementary_material [file attachment]

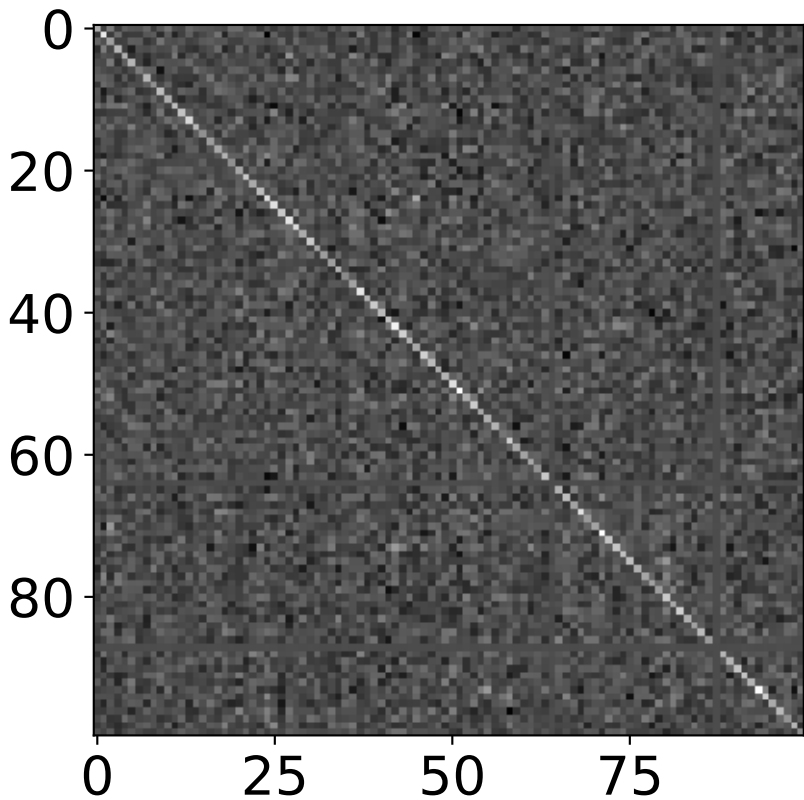

Supplement: supplementary_material [file attachment]

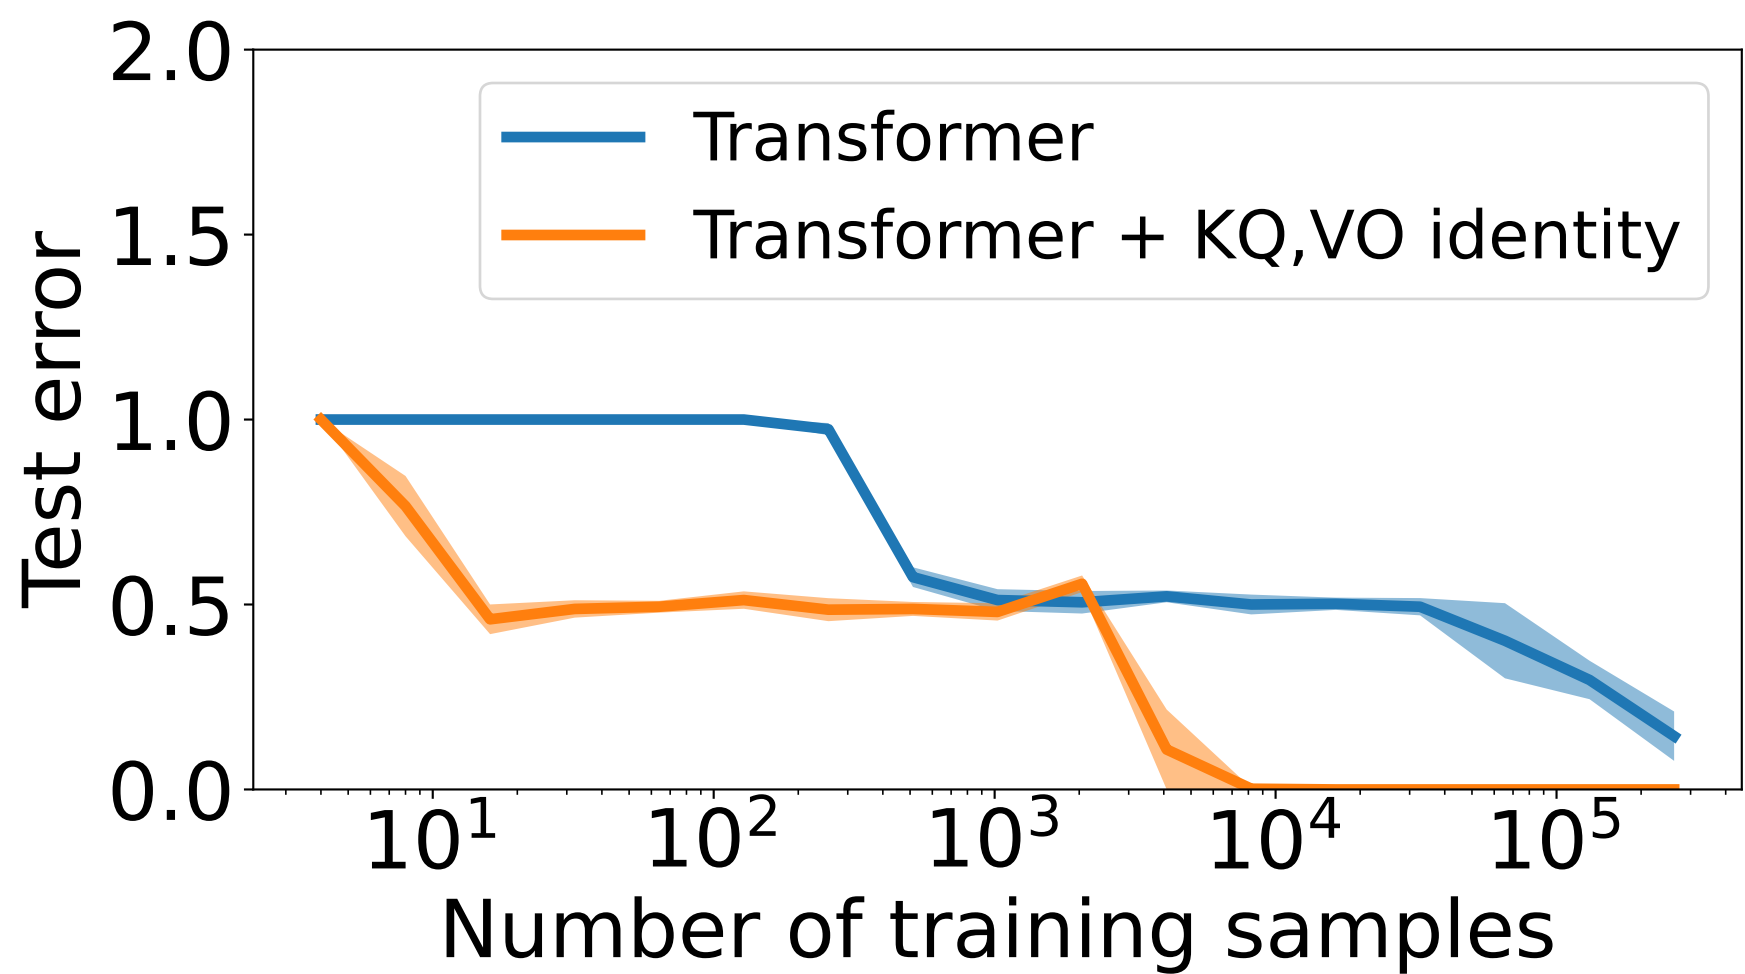

Supplement: supplementary_material [file attachment]

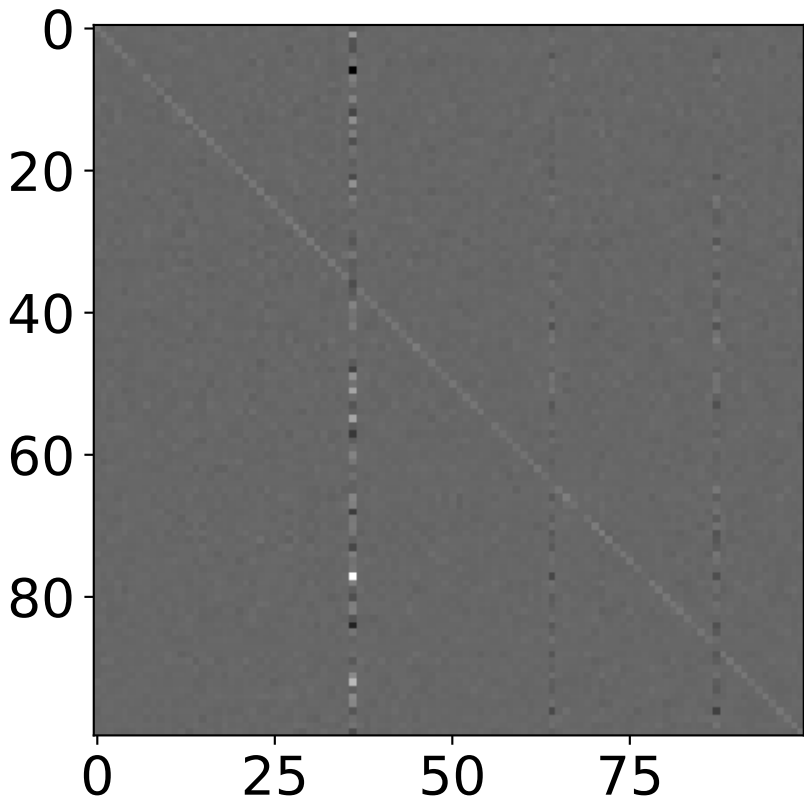

Supplement: supplementary_material [file attachment]

$W_V W_O^T$  in Layer 11, Head 5 of GPT-2

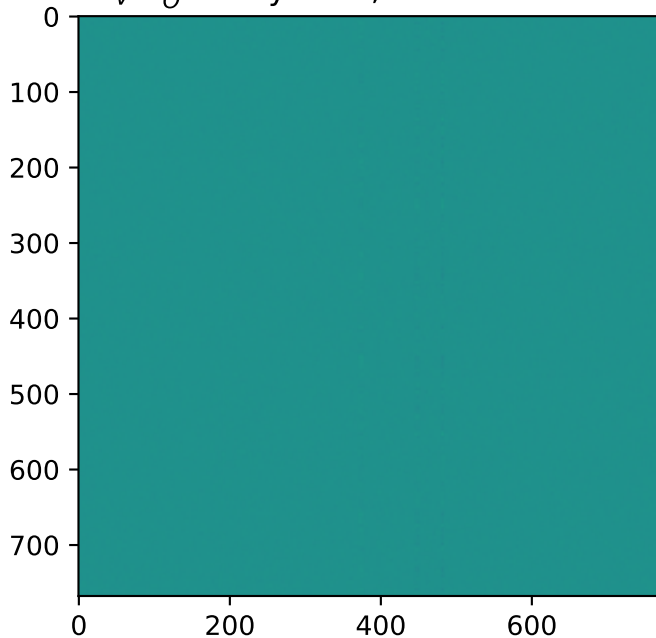

Supplement: supplementary_material [file attachment]

$W_V W_O^T$  in Layer 8, Head 3 of GPT-2

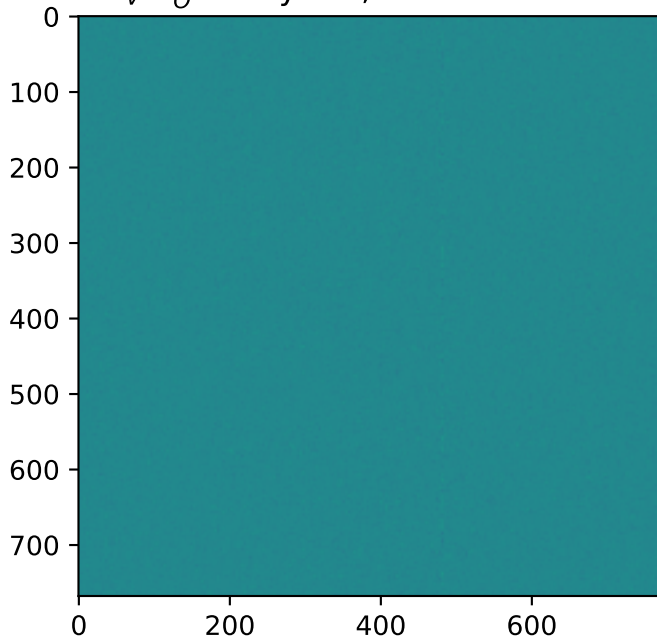

Supplement: supplementary_material [file attachment]

$W_K W_Q^T$  in Layer 3, Head 3 of GPT-2

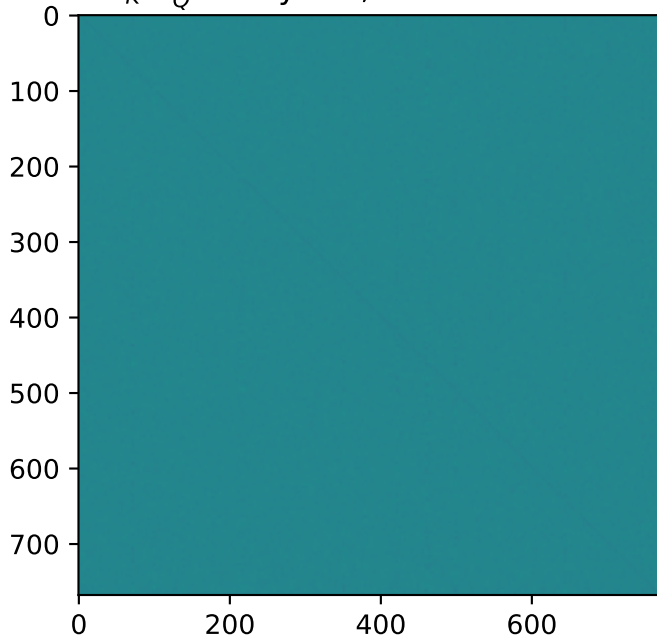

Supplement: supplementary_material [file attachment]

$W_V W_O^T$  in Layer 11, Head 8 of GPT-2

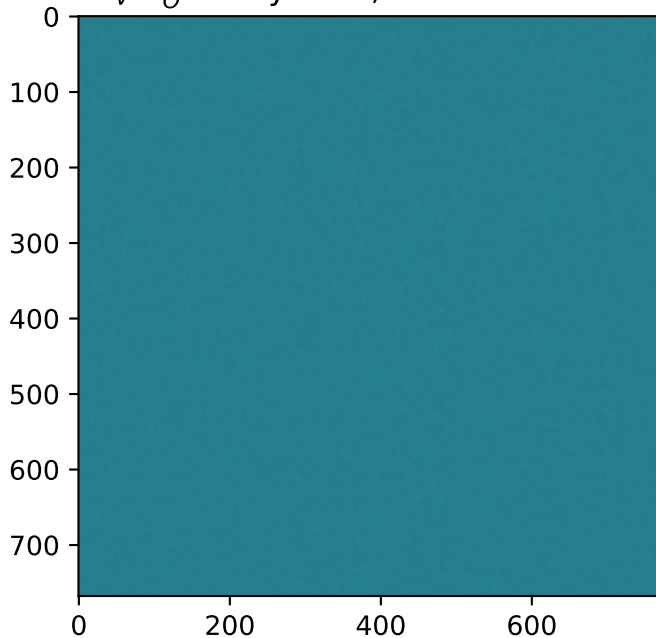

Supplement: supplementary_material [file attachment]

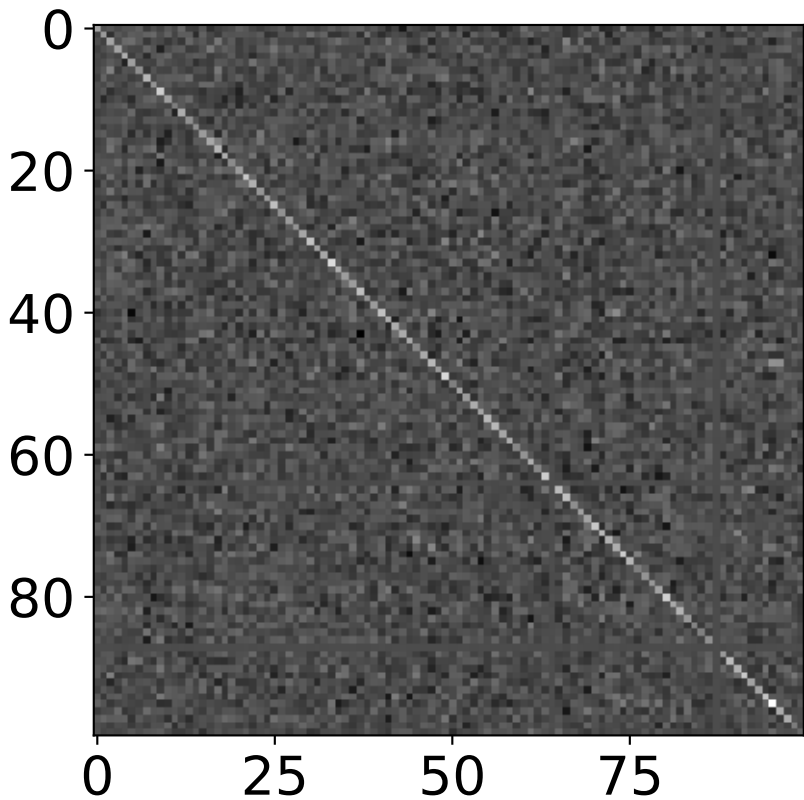

Supplement: supplementary_material [file attachment]

$W_K W_Q^T$  in Layer 3, Head 2 of GPT-2

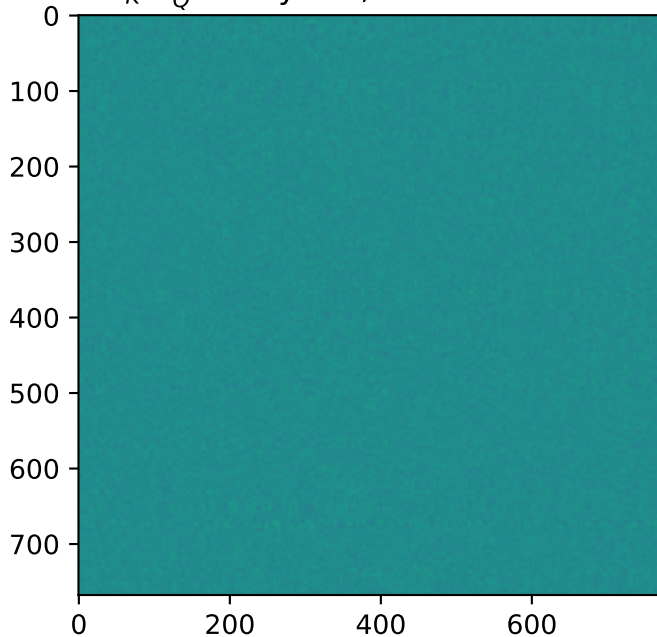

Supplement: supplementary_material [file attachment]

## Transformer train loss vs. learning rate and number of samples, batch size 1024

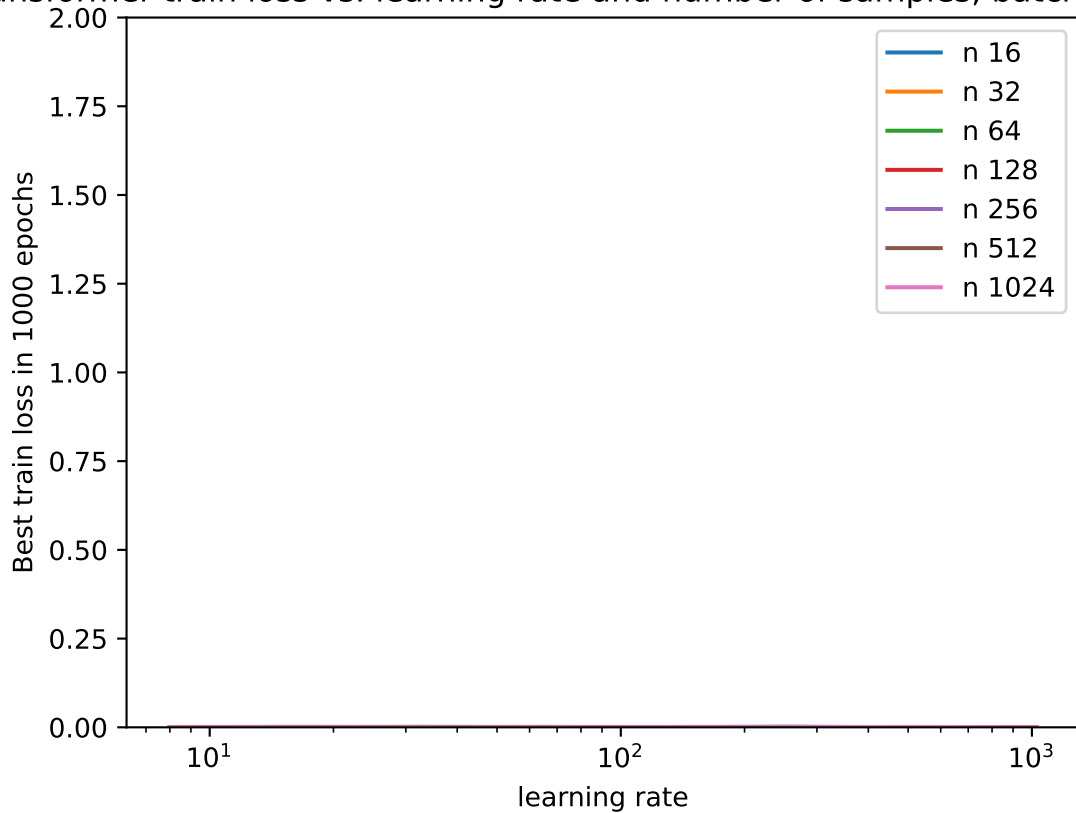

Supplement: supplementary_material [file attachment]

$W_V W_O^T$  in Layer 3, Head 9 of GPT-2

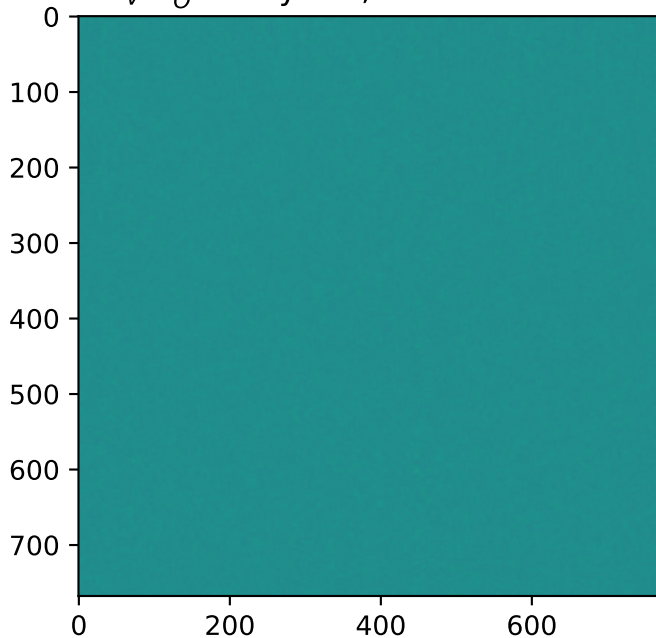

Supplement: supplementary_material [file attachment]

Transformer test loss on various tasks

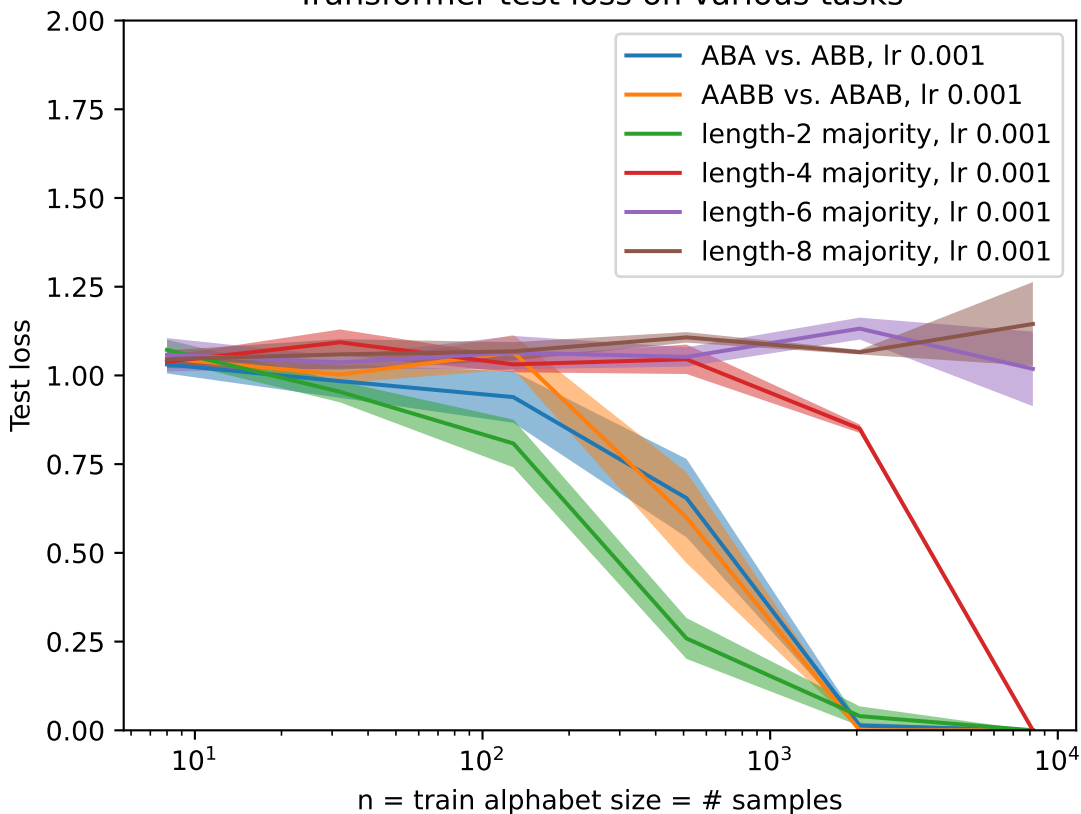

Supplement: supplementary_material [file attachment]

$W_V W_O^T$  in Layer 4, Head 9 of GPT-2

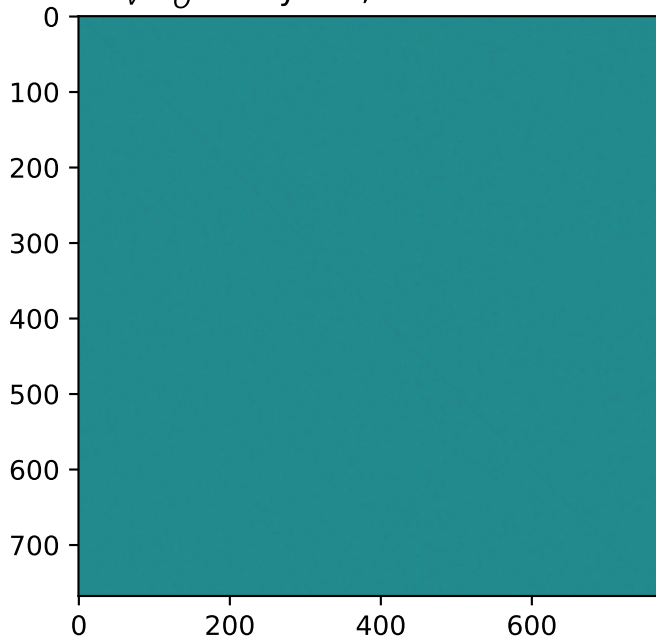

Supplement: supplementary_material [file attachment]

Transformer GOTU vs. learning rate and depth, at  $n = 1024$

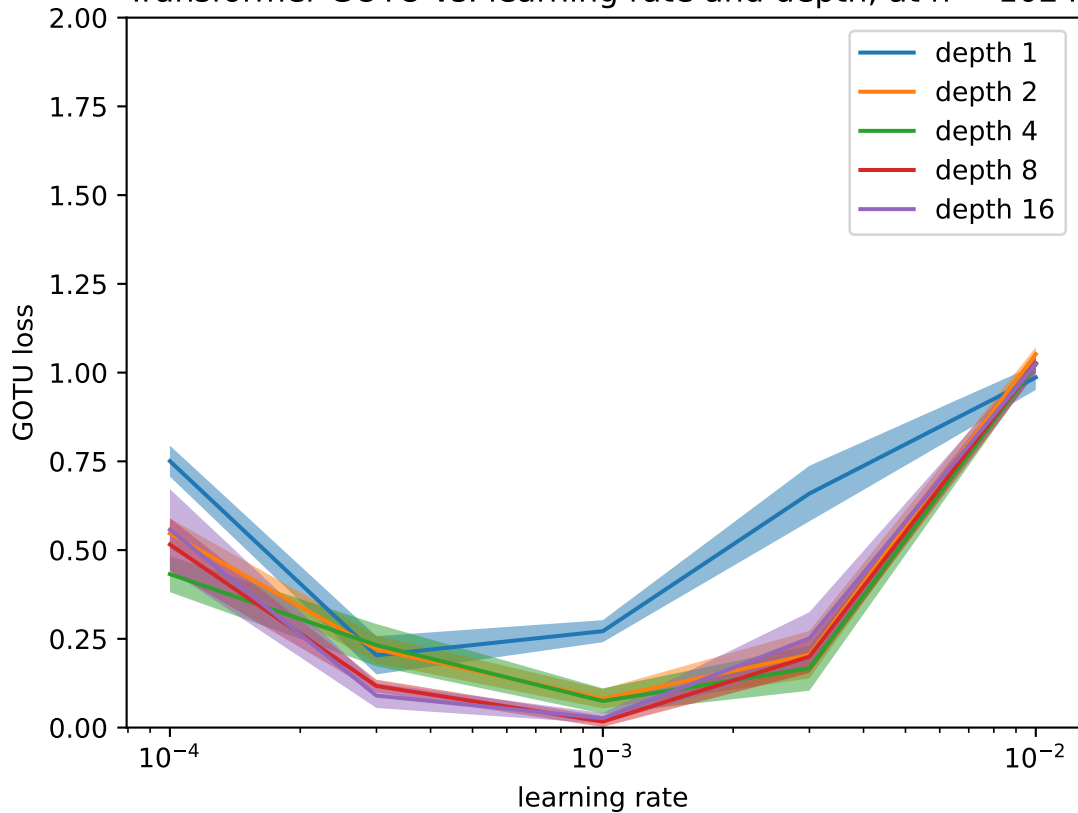

Supplement: supplementary_material [file attachment]

Transformer train loss on various tasks

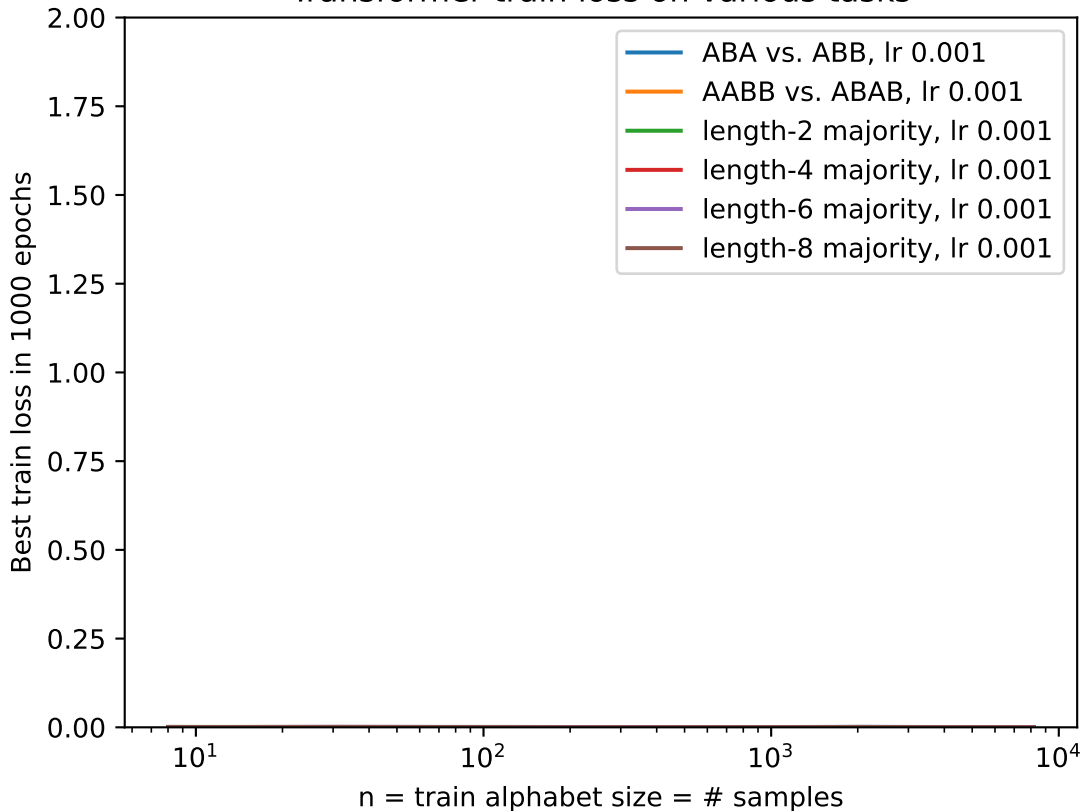

Supplement: supplementary_material [file attachment]

$W_K W_Q^T$  in Layer 4, Head 9 of GPT-2

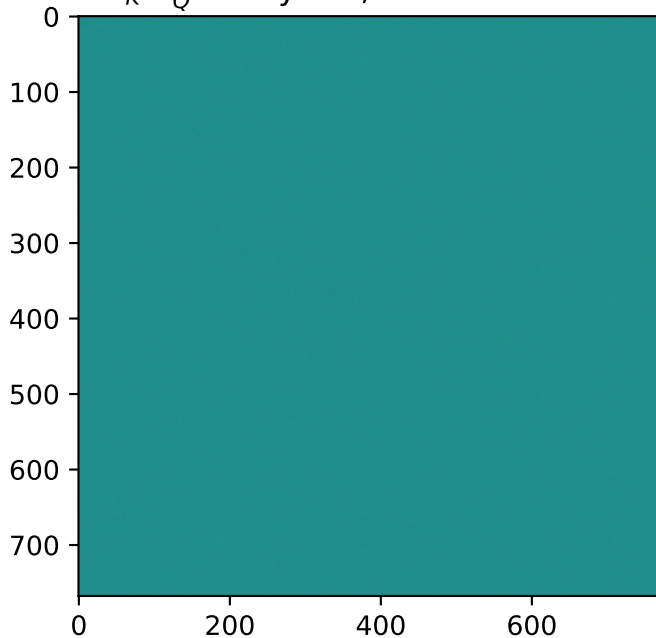

Supplement: supplementary_material [file attachment]

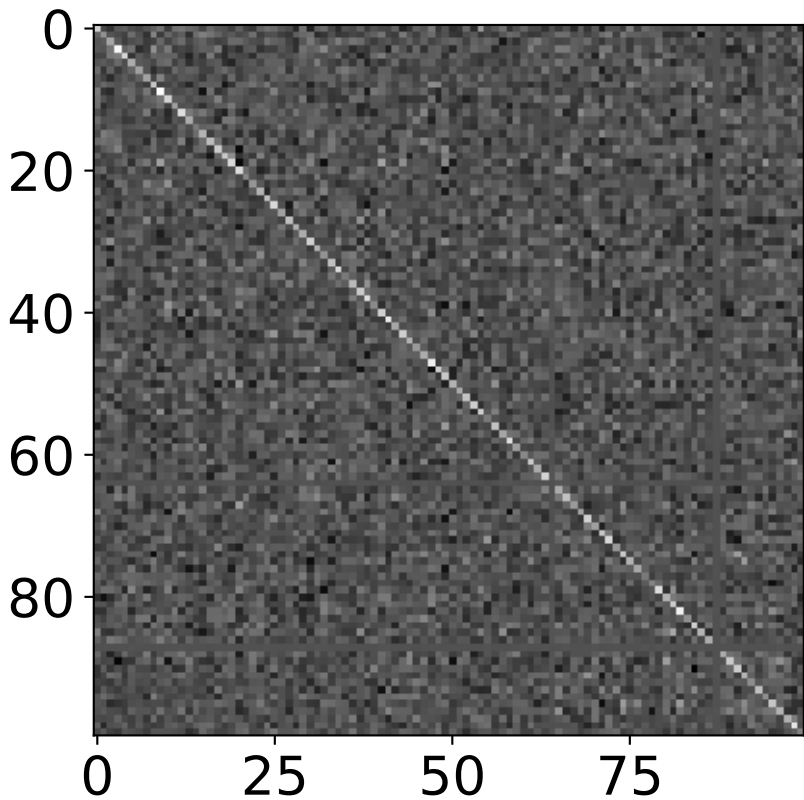

Supplement: supplementary_material [file attachment]

Transformer test loss on majority tasks

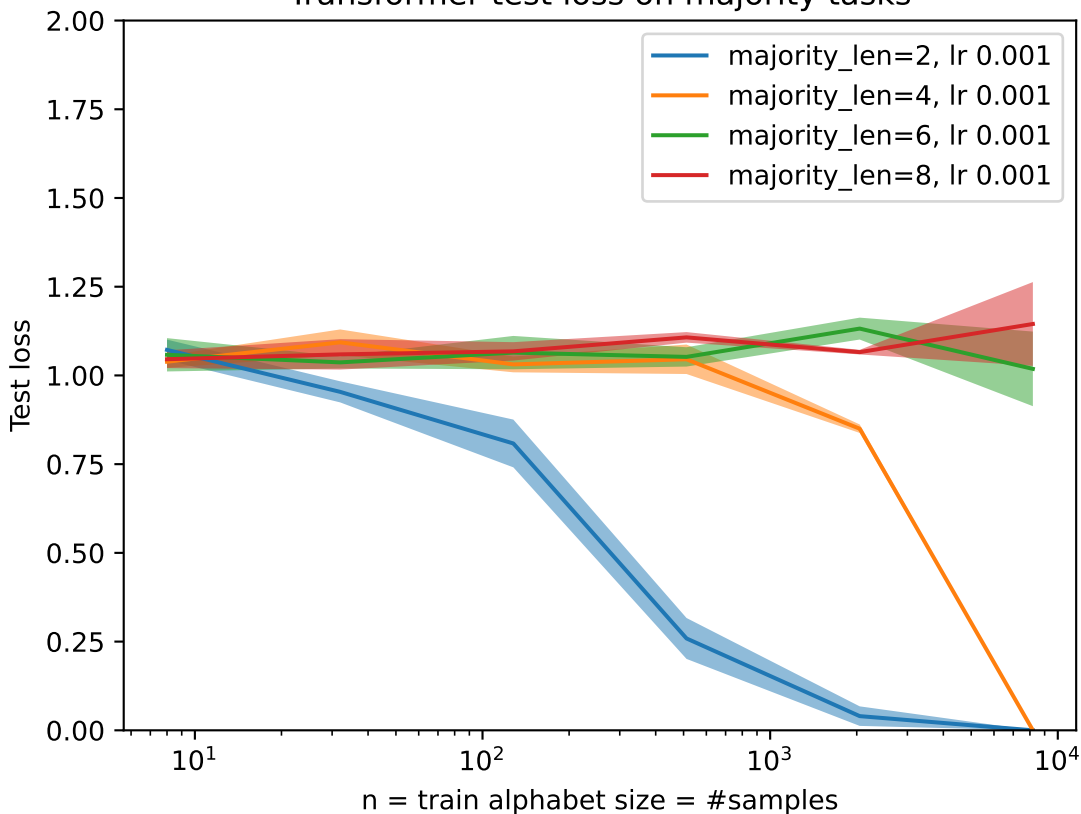

Supplement: supplementary_material [file attachment]

$W_K W_Q^T$  in Layer 1, Head 6 of GPT-2

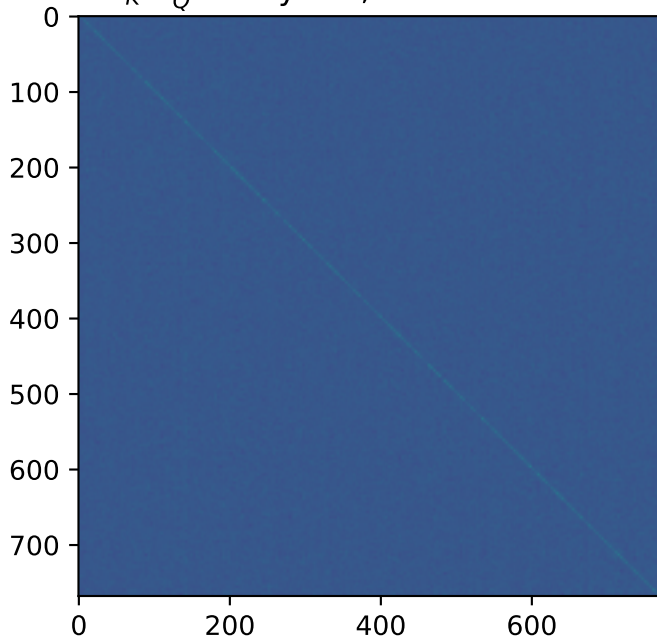

Supplement: supplementary_material [file attachment]

$W_V W_O^T$  in Layer 9, Head 2 of GPT-2

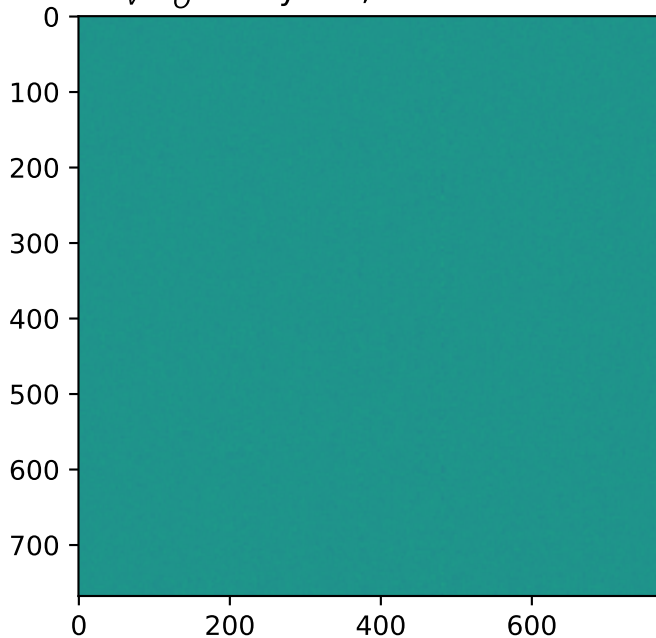

Supplement: supplementary_material [file attachment]

$W_V W_O^T$  in Layer 3, Head 7 of GPT-2

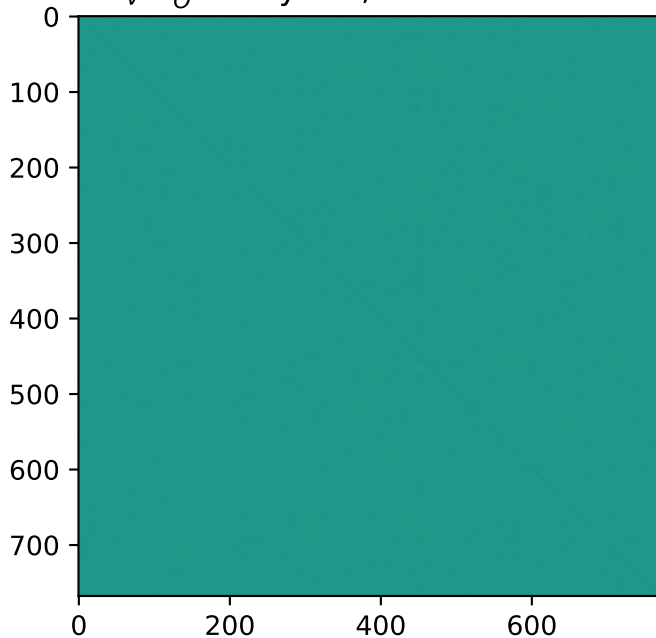

Supplement: supplementary_material [file attachment]

$W_V W_O^T$  in Layer 1, Head 9 of GPT-2

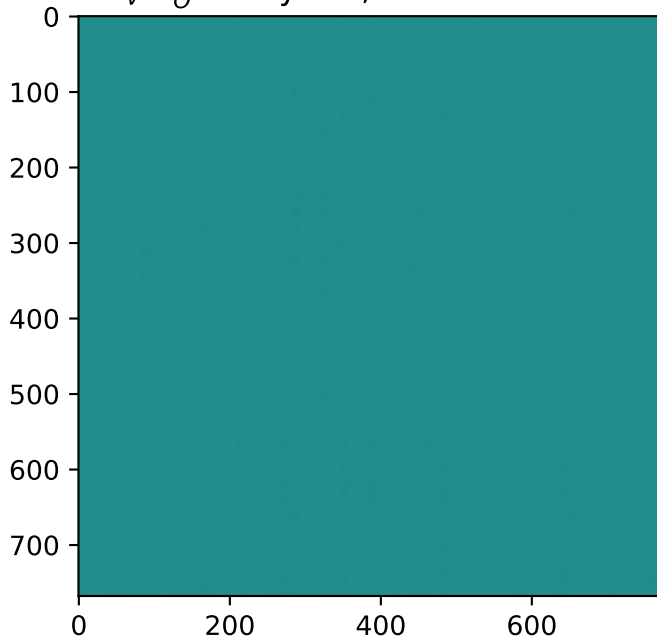

Supplement: supplementary_material [file attachment]

$W_V W_O^T$  in Layer 1, Head 10 of GPT-2

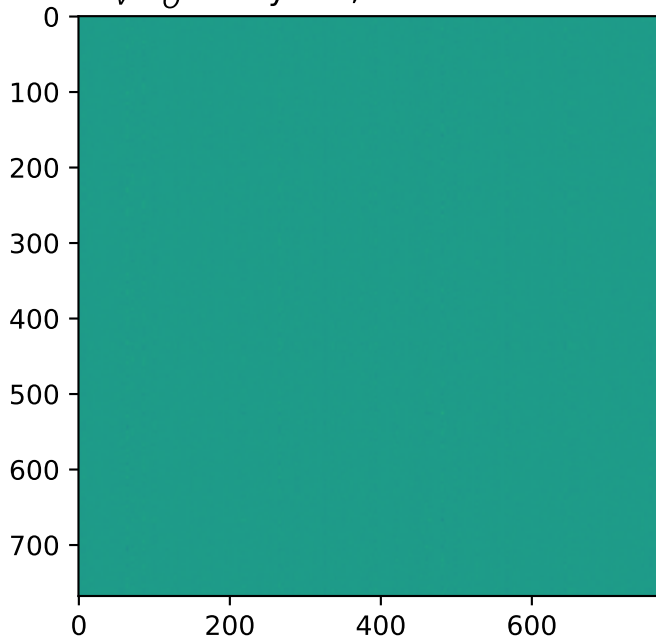

Supplement: supplementary_material [file attachment]

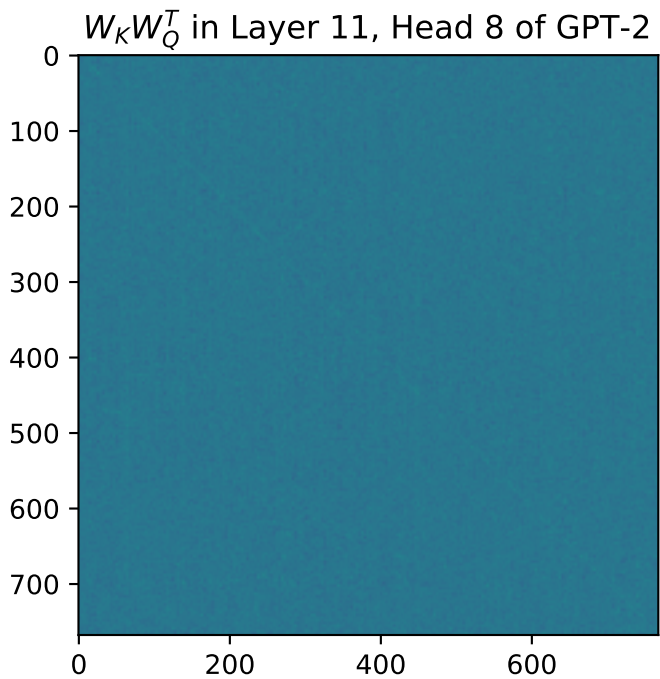

Supplement: supplementary_material [file attachment]

$W_V W_O^T$  in Layer 5, Head 11 of GPT-2

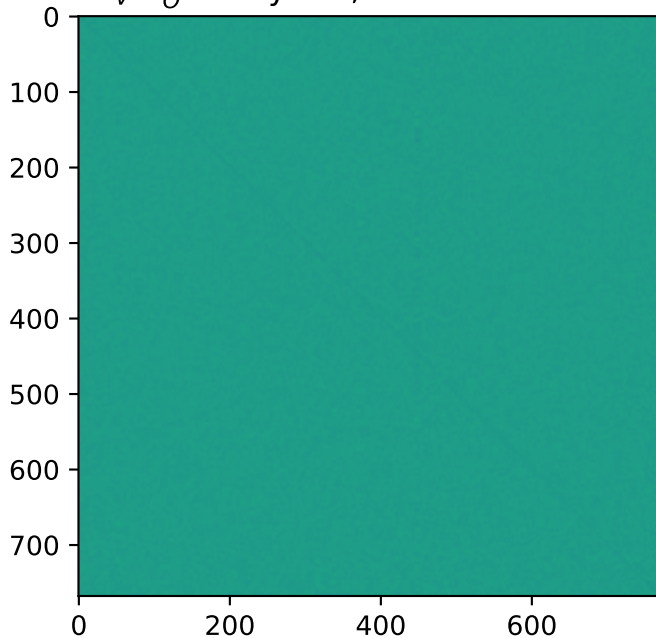

Supplement: supplementary_material [file attachment]

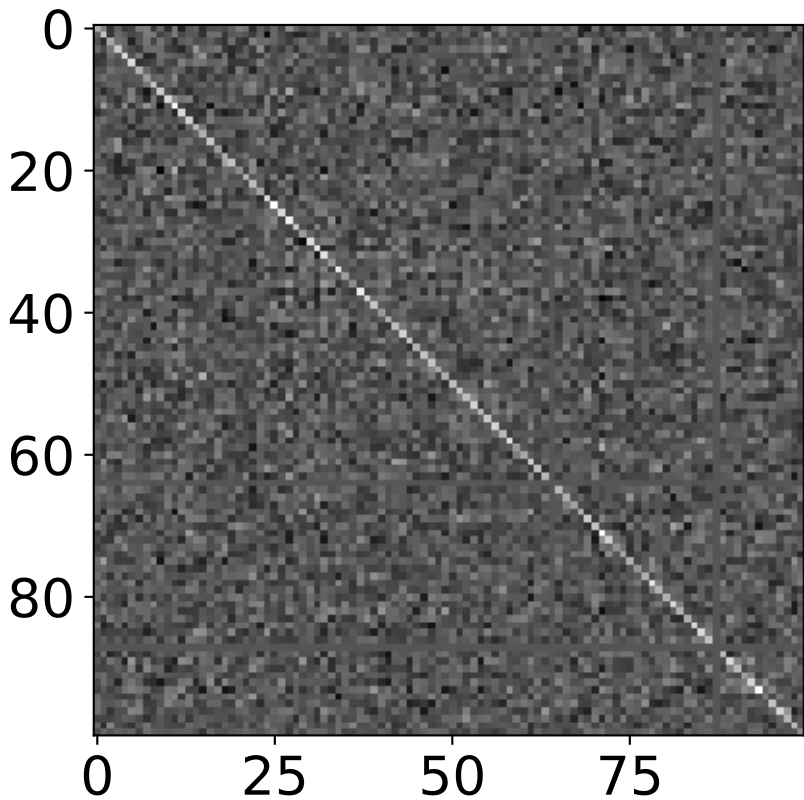

Supplement: supplementary_material [file attachment]

$W_V W_O^T$  in Layer 1, Head 3 of GPT-2

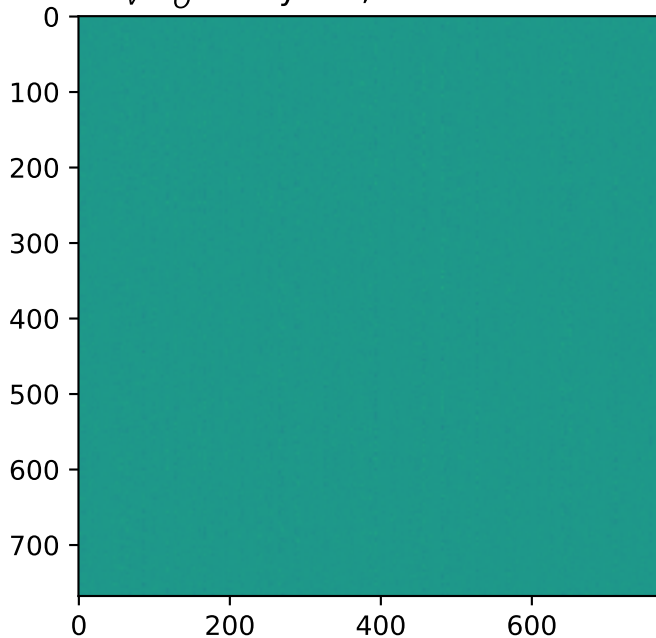

Supplement: supplementary_material [file attachment]

$W_V W_O^T$  in Layer 5, Head 1 of GPT-2

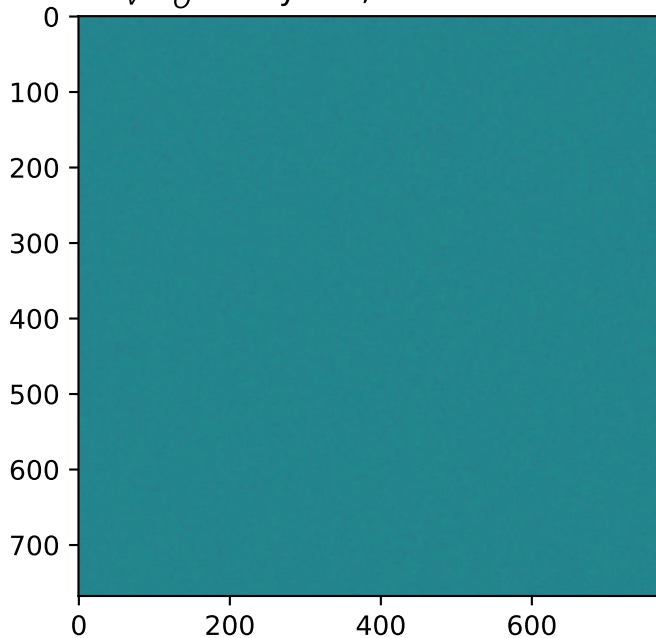

Supplement: supplementary_material [file attachment]

$W_V W_O^T$  in Layer 7, Head 10 of GPT-2

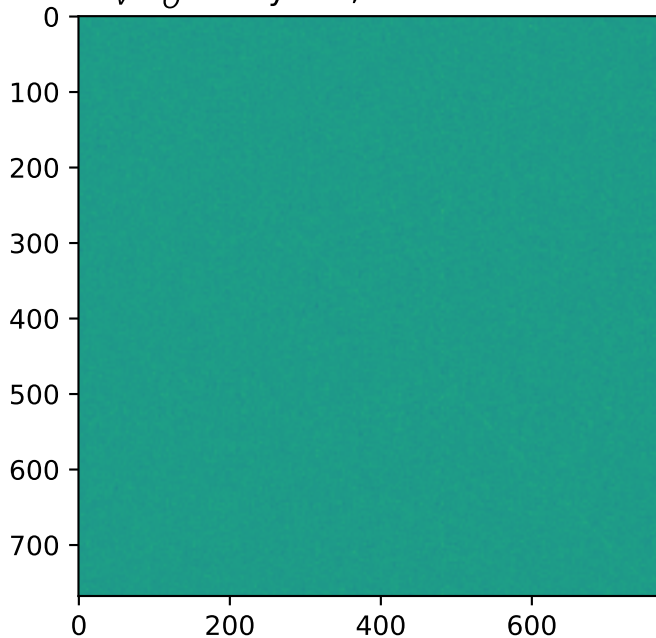

Supplement: supplementary_material [file attachment]

$W_K W_Q^T$  in Layer 6, Head 5 of GPT-2

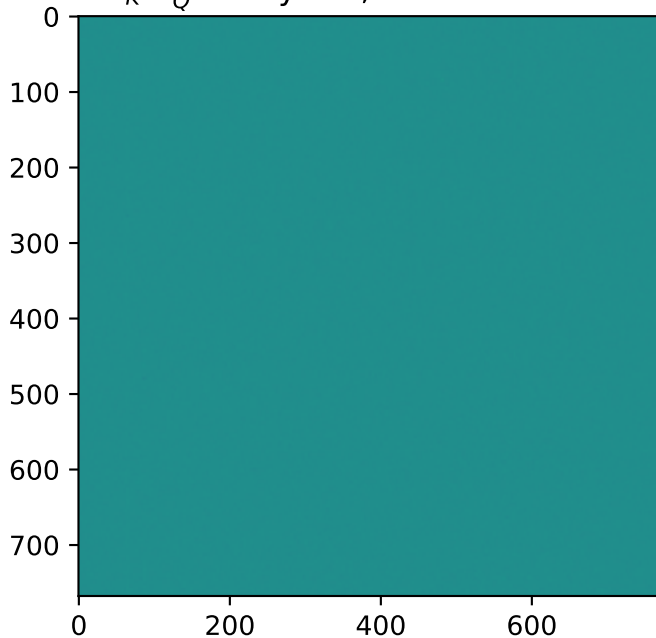

Supplement: supplementary_material [file attachment]

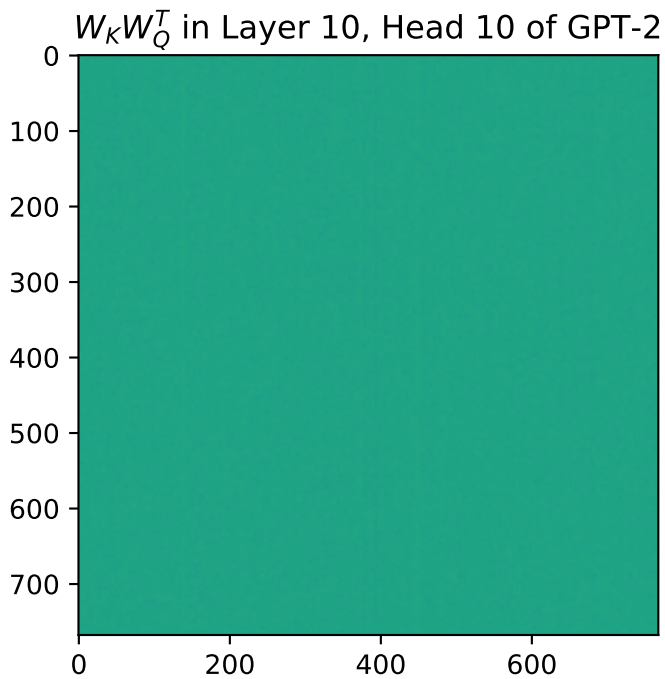

Supplement: supplementary_material [file attachment]

$W_V W_O^T$  in Layer 8, Head 8 of GPT-2

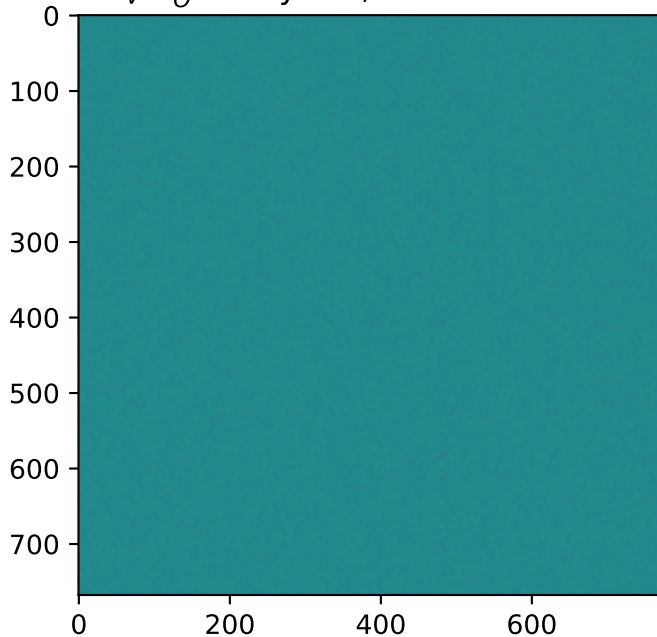

Supplement: supplementary_material [file attachment]

$W_K W_Q^T$  in Layer 4, Head 5 of GPT-2

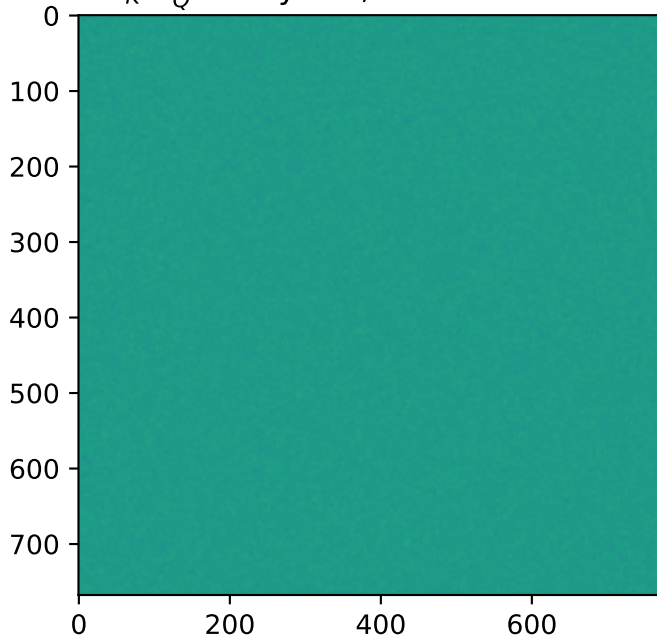

Supplement: supplementary_material [file attachment]

$W_V W_O^T$  in Layer 7, Head 5 of GPT-2

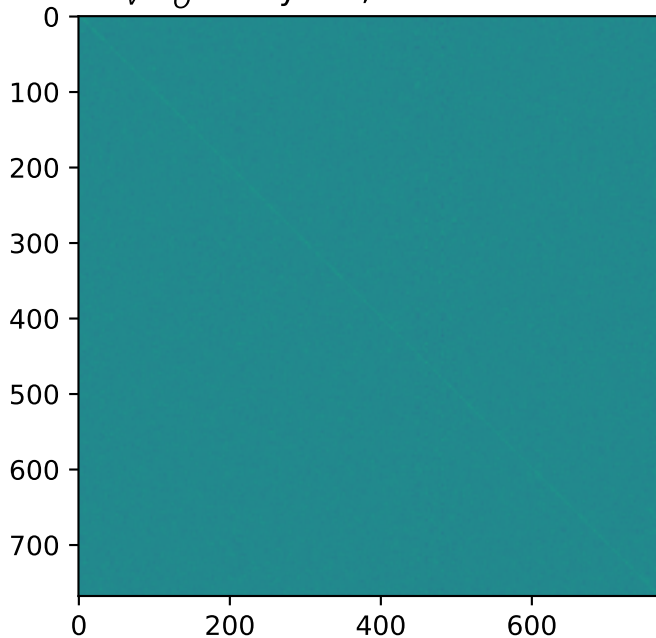

Supplement: supplementary_material [file attachment]

Transformer test loss vs. learning rate and batch size, at n = 512

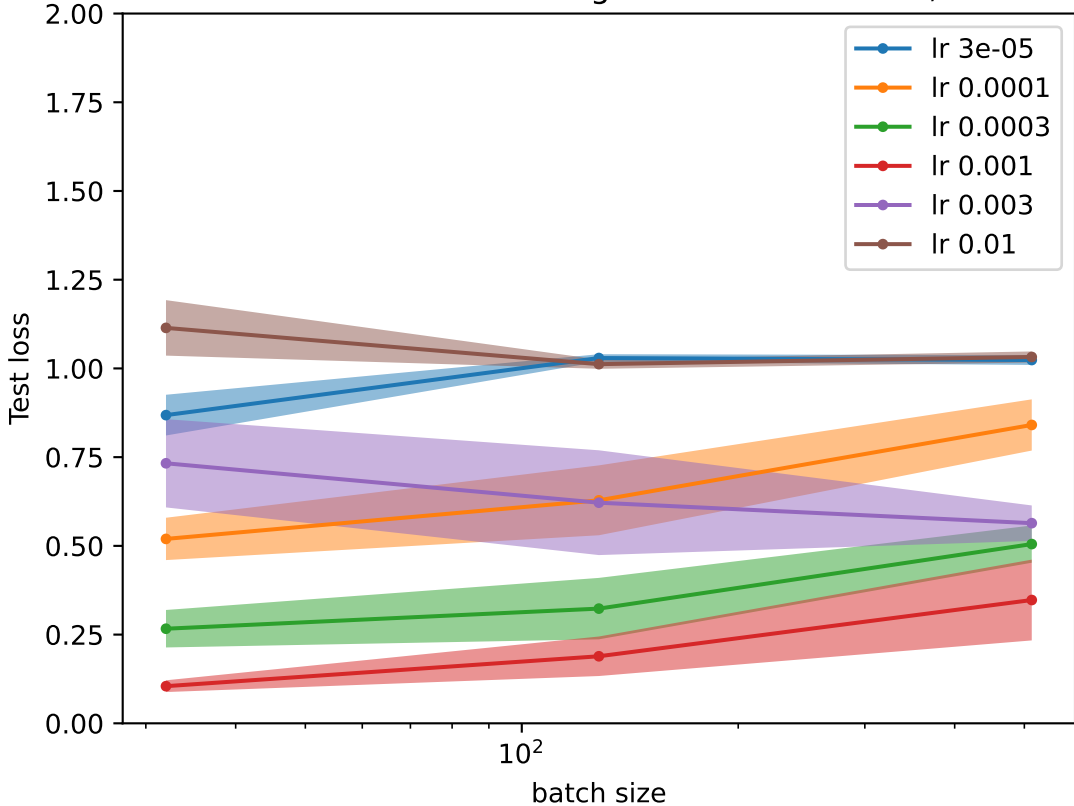

Supplement: supplementary_material [file attachment]

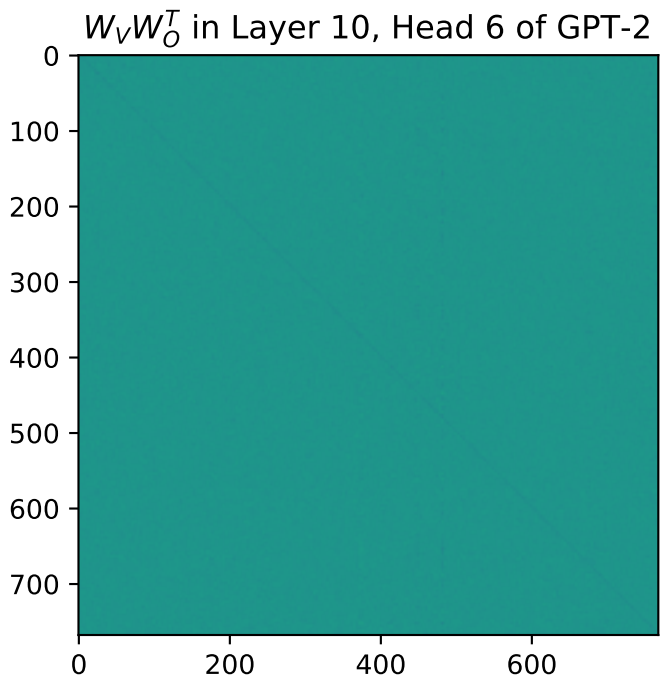

Supplement: supplementary_material [file attachment]

$W_V W_O^T$  in Layer 8, Head 4 of GPT-2

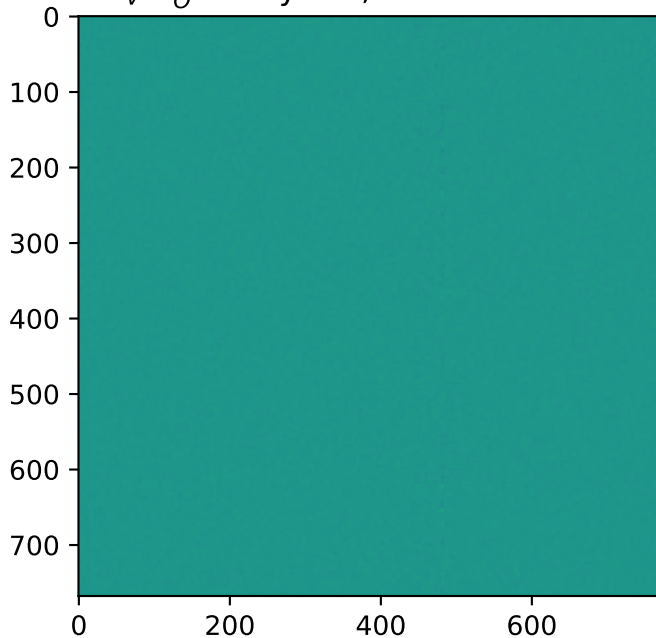

Supplement: supplementary_material [file attachment]

Transformer train loss vs. learning rate and depth, at n = 512

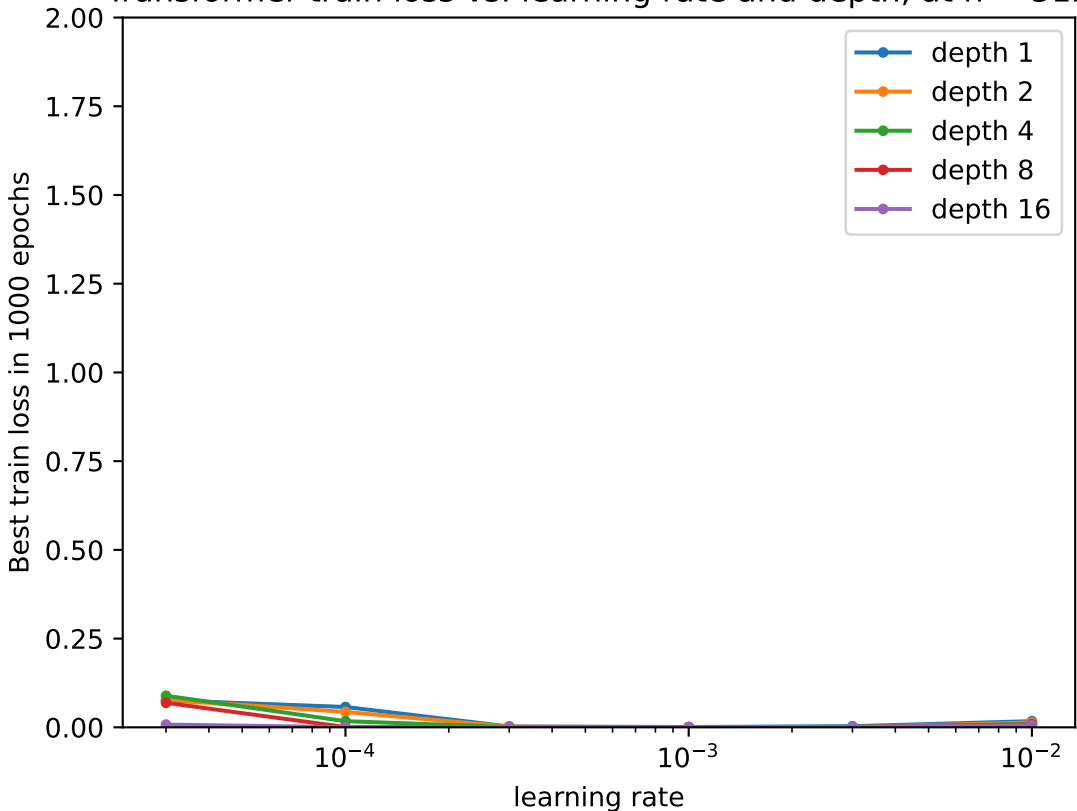

Supplement: supplementary_material [file attachment]

$W_K W_Q^T$  in Layer 3, Head 7 of GPT-2

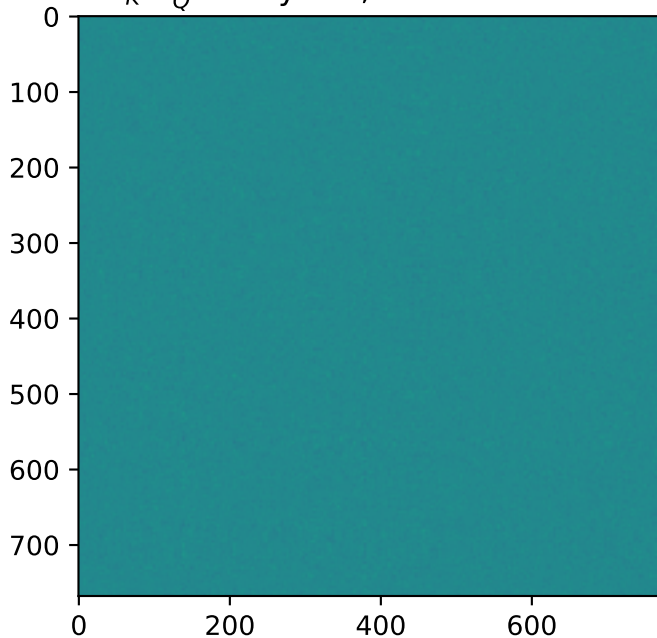

Supplement: supplementary_material [file attachment]

$W_K W_Q^T$  in Layer 9, Head 2 of GPT-2

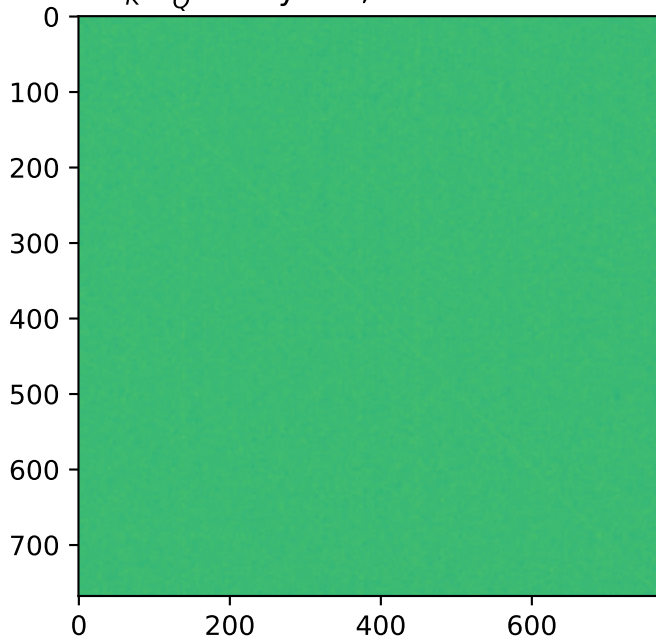

Supplement: supplementary_material [file attachment]

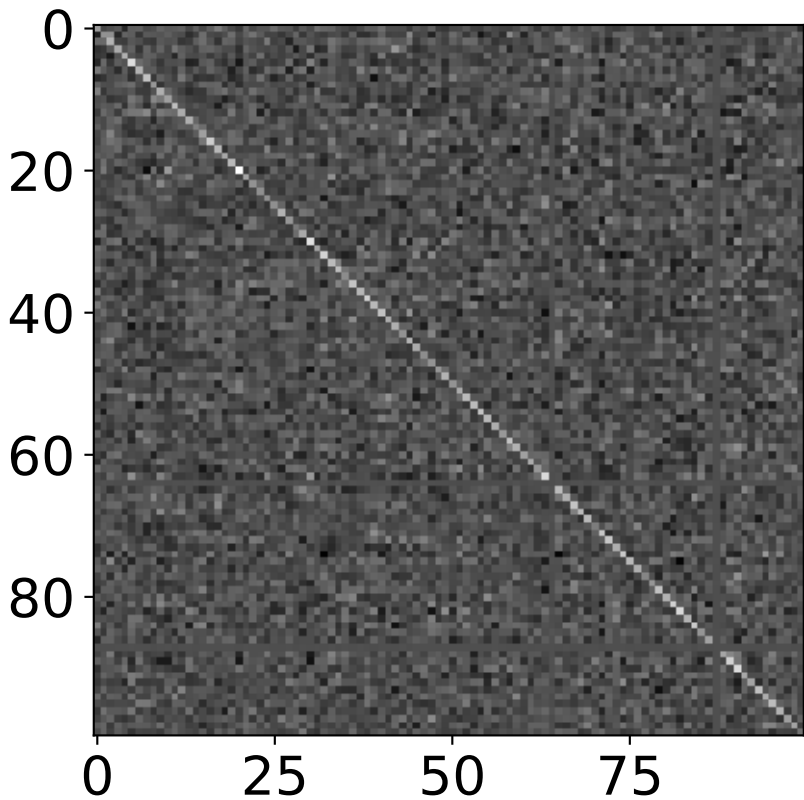

Supplement: supplementary_material [file attachment]

$W_V W_O^T$  in Layer 6, Head 8 of GPT-2

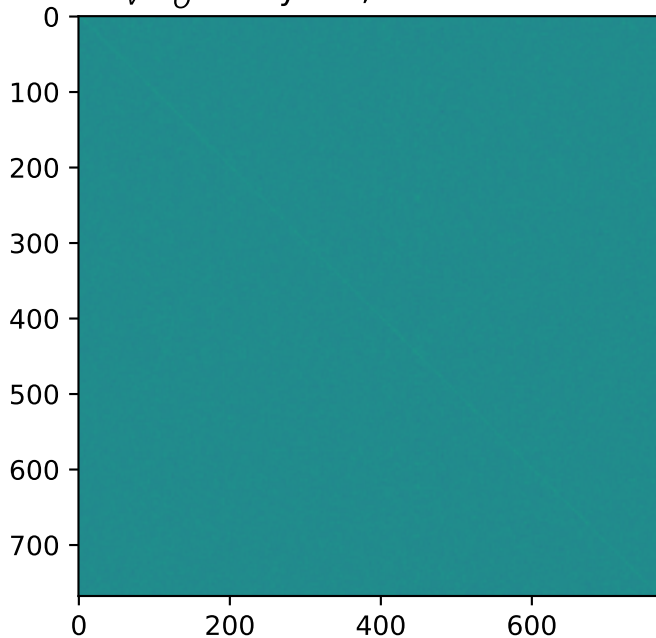

Supplement: supplementary_material [file attachment]

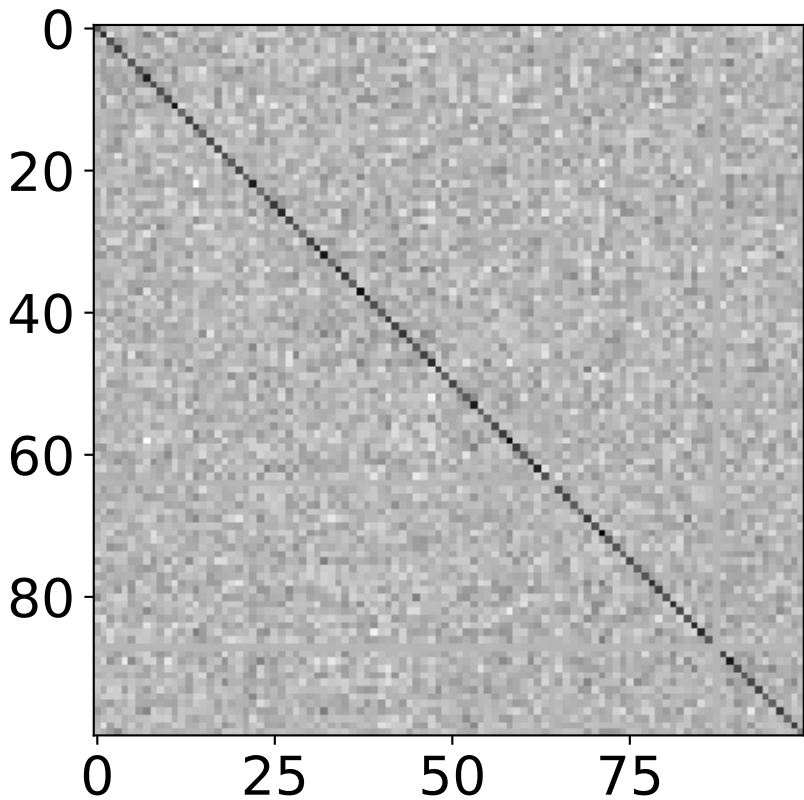

Supplement: supplementary_material [file attachment]

$W_V W_O^T$  in Layer 8, Head 7 of GPT-2

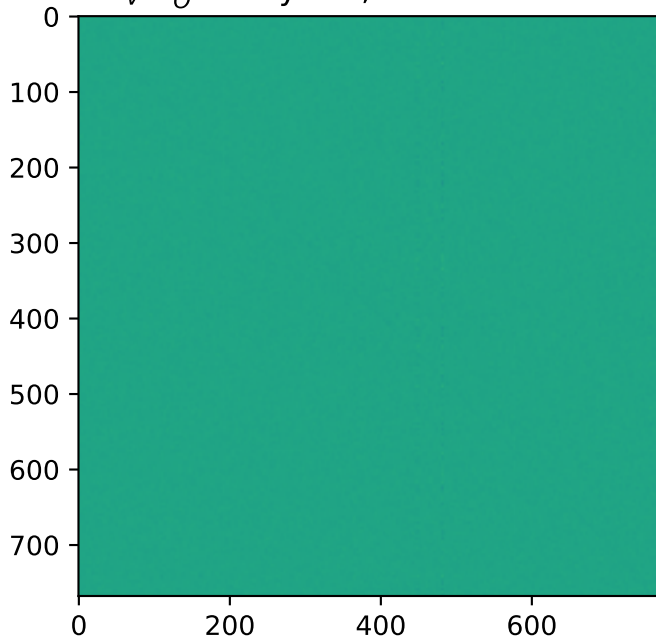

Supplement: supplementary_material [file attachment]

$W_V W_O^T$  in Layer 8, Head 6 of GPT-2

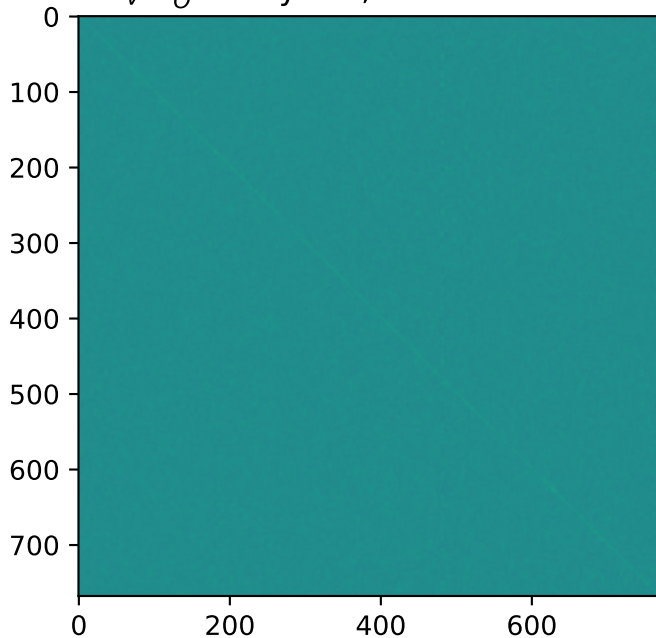

Supplement: supplementary_material [file attachment]

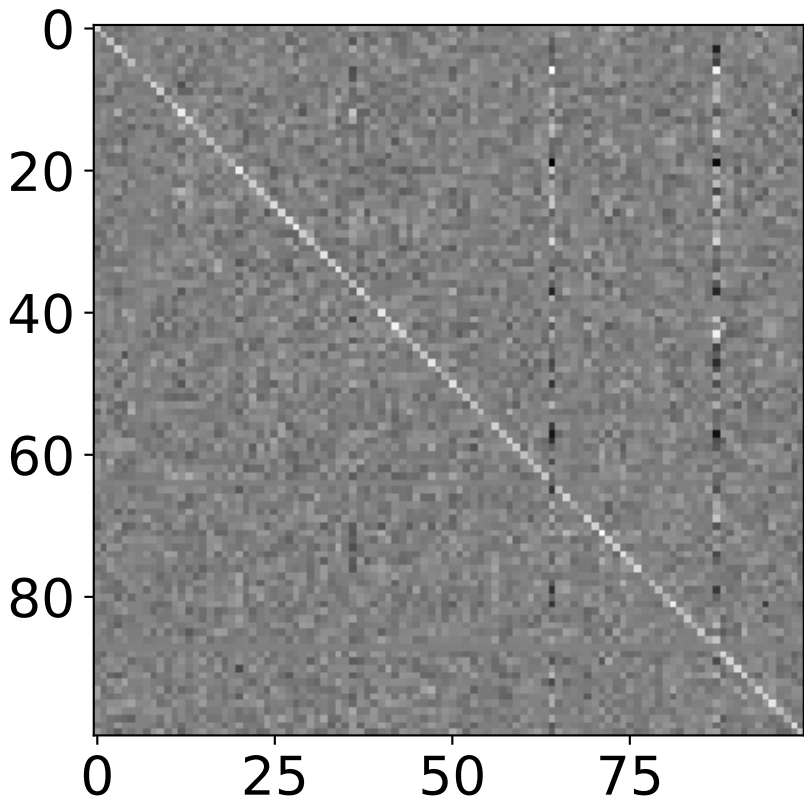

Supplement: supplementary_material [file attachment]

$W_V W_O^T$  in Layer 3, Head 6 of GPT-2

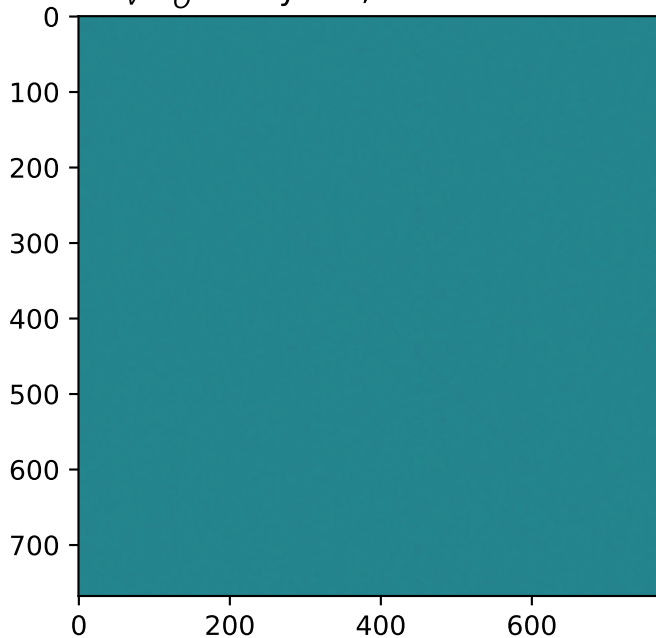

Supplement: supplementary_material [file attachment]

$W_K W_Q^T$  in Layer 5, Head 2 of GPT-2

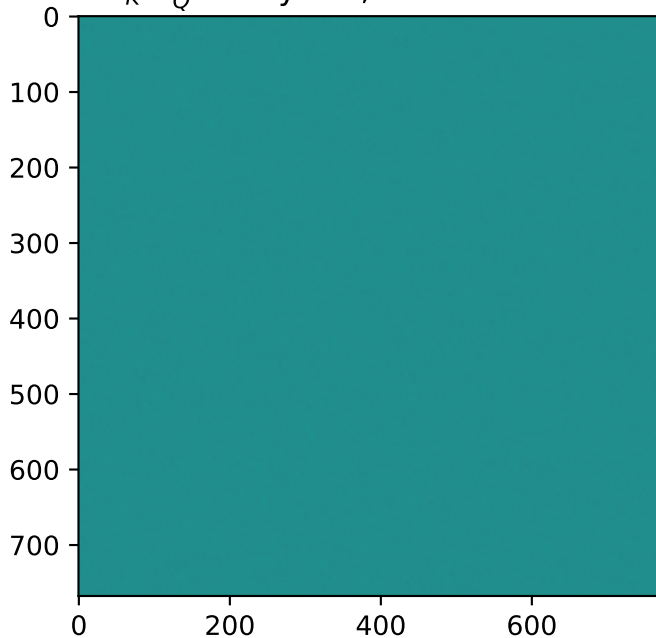

Supplement: supplementary_material [file attachment]

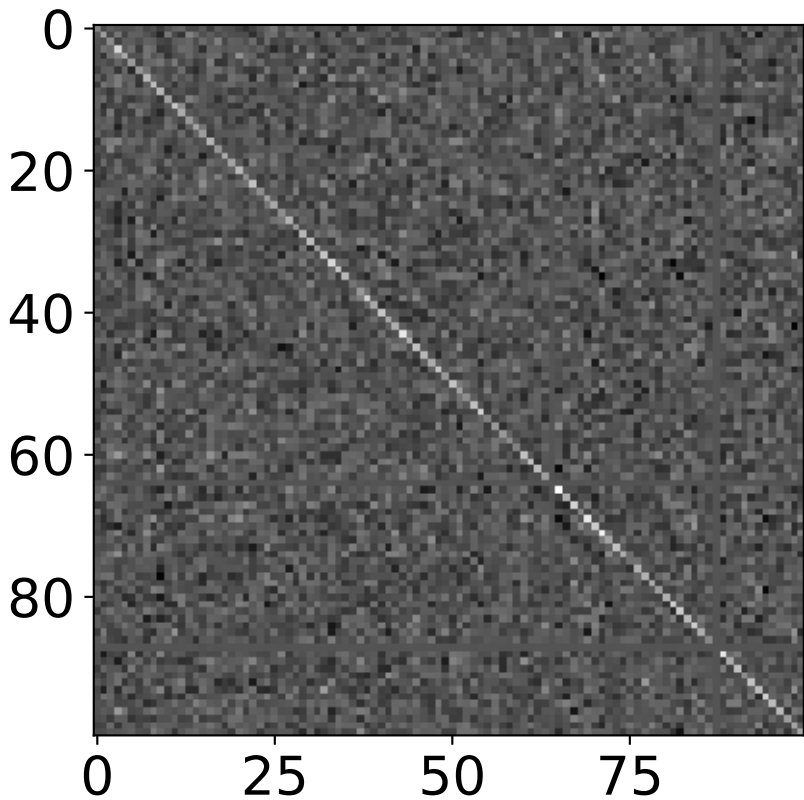

Supplement: supplementary_material [file attachment]

Transformer test loss vs. learning rate and number of heads, at  $n = 512$

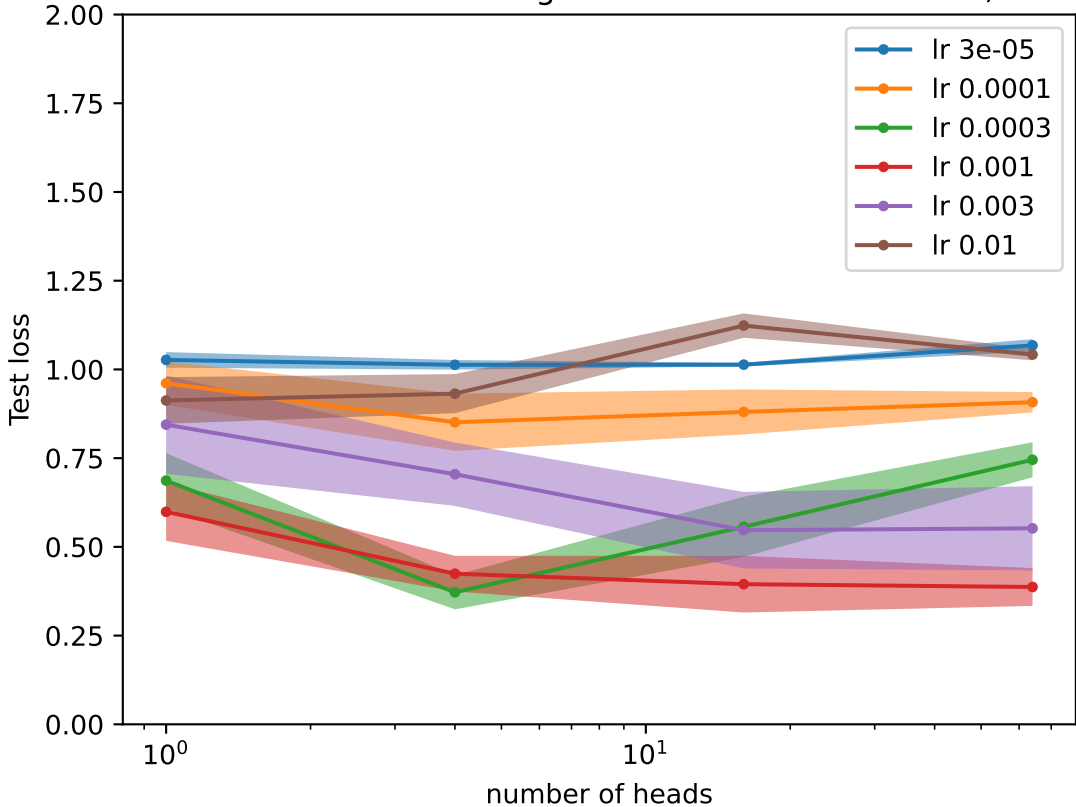

Supplement: supplementary_material [file attachment]

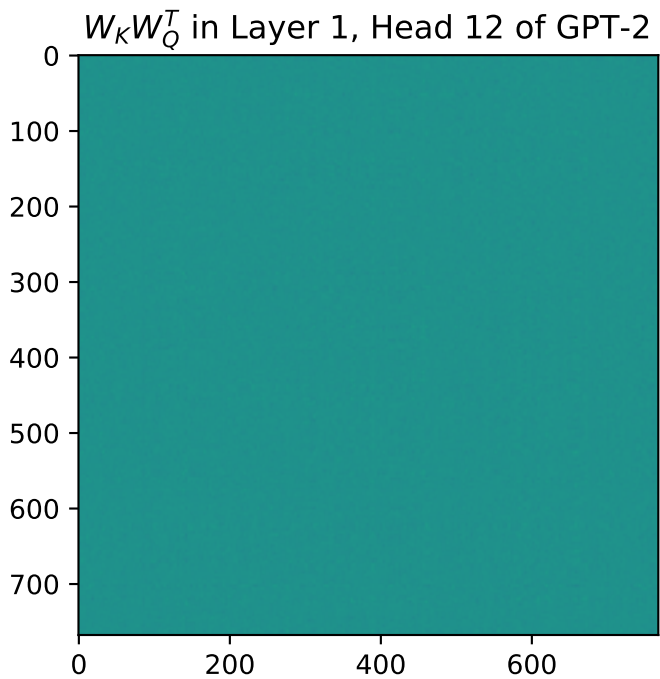

Supplement: supplementary_material [file attachment]

Transformer train loss with Gaussian init vs. mimetic init.

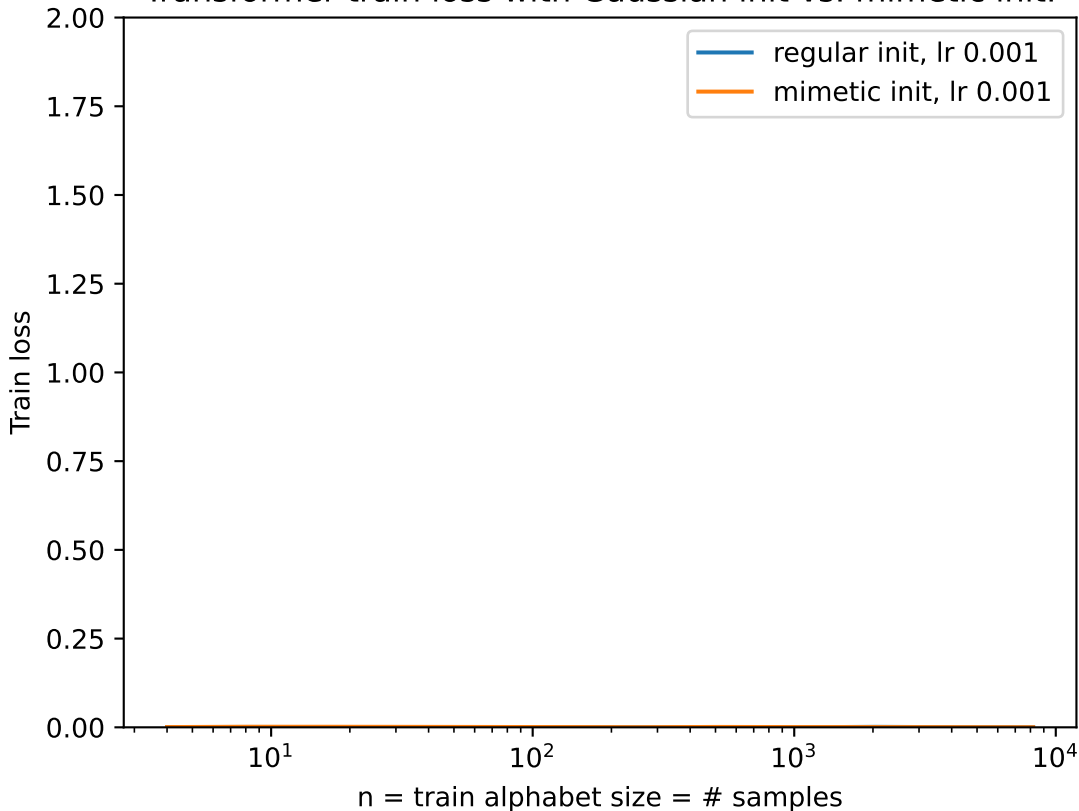

Supplement: supplementary_material [file attachment]

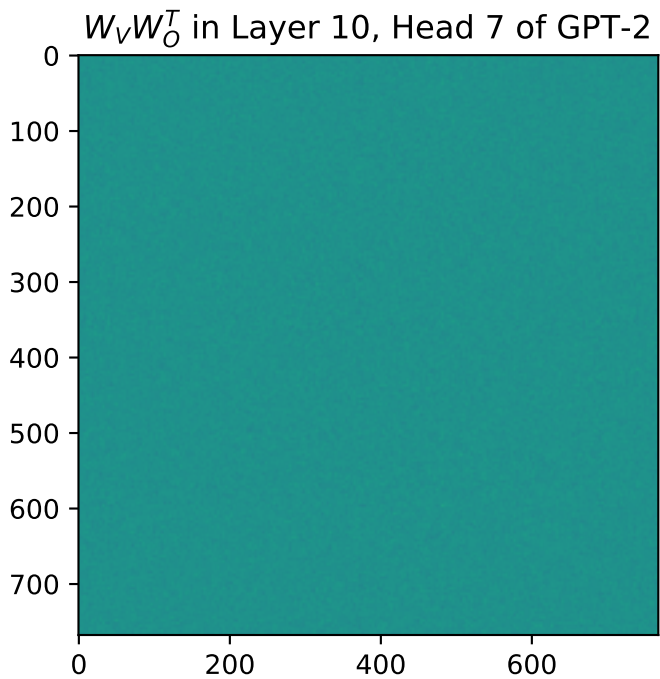

Supplement: supplementary_material [file attachment]

Transformer test loss vs. learning rate and batch size, at n = 512

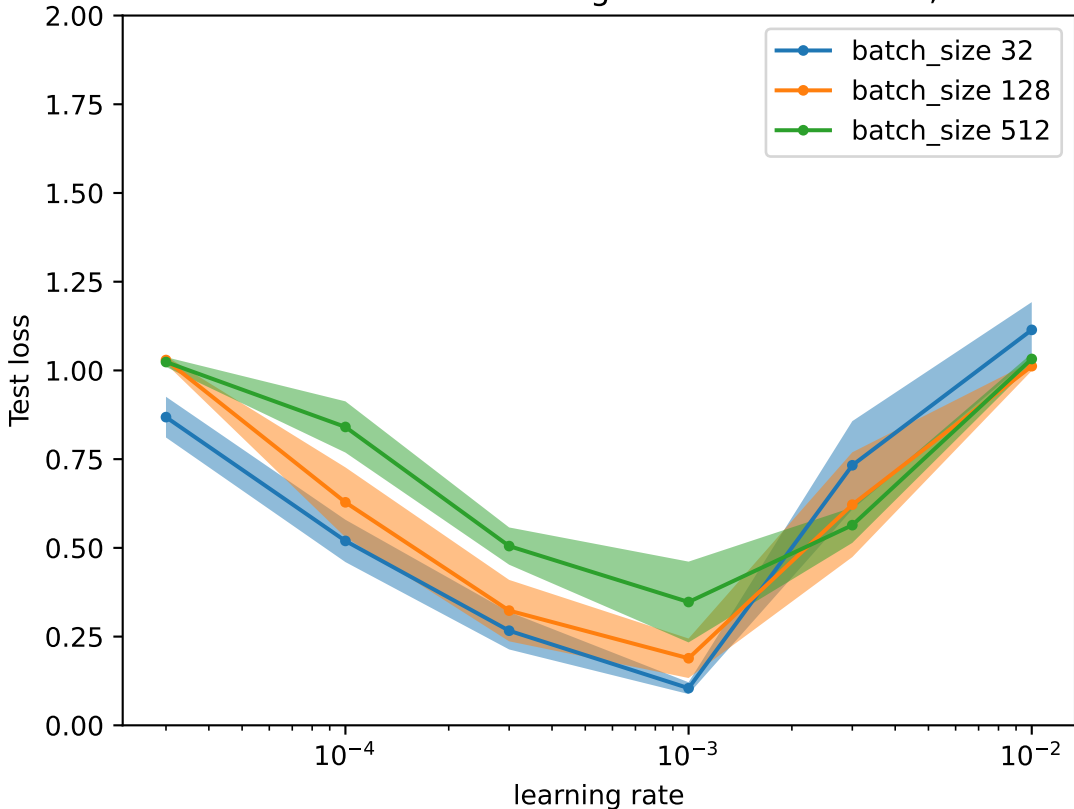

Supplement: supplementary_material [file attachment]

$W_V W_O^T$  in Layer 7, Head 2 of GPT-2

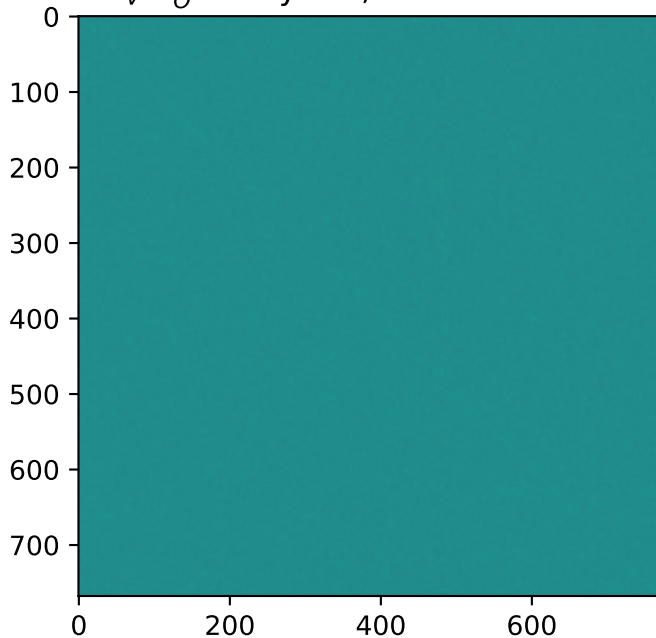

Supplement: supplementary_material [file attachment]

$W_V W_O^T$  in Layer 6, Head 1 of GPT-2

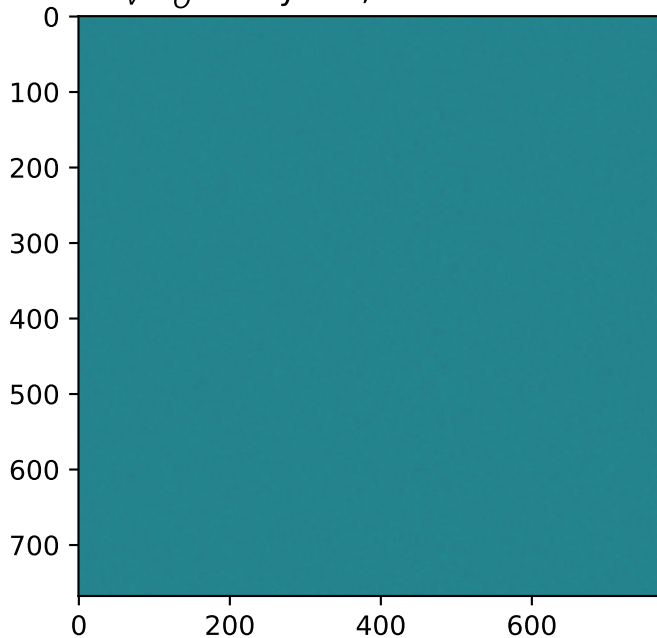

Supplement: supplementary_material [file attachment]

Transformer train loss vs. batch size and number of samples, lr 0.001

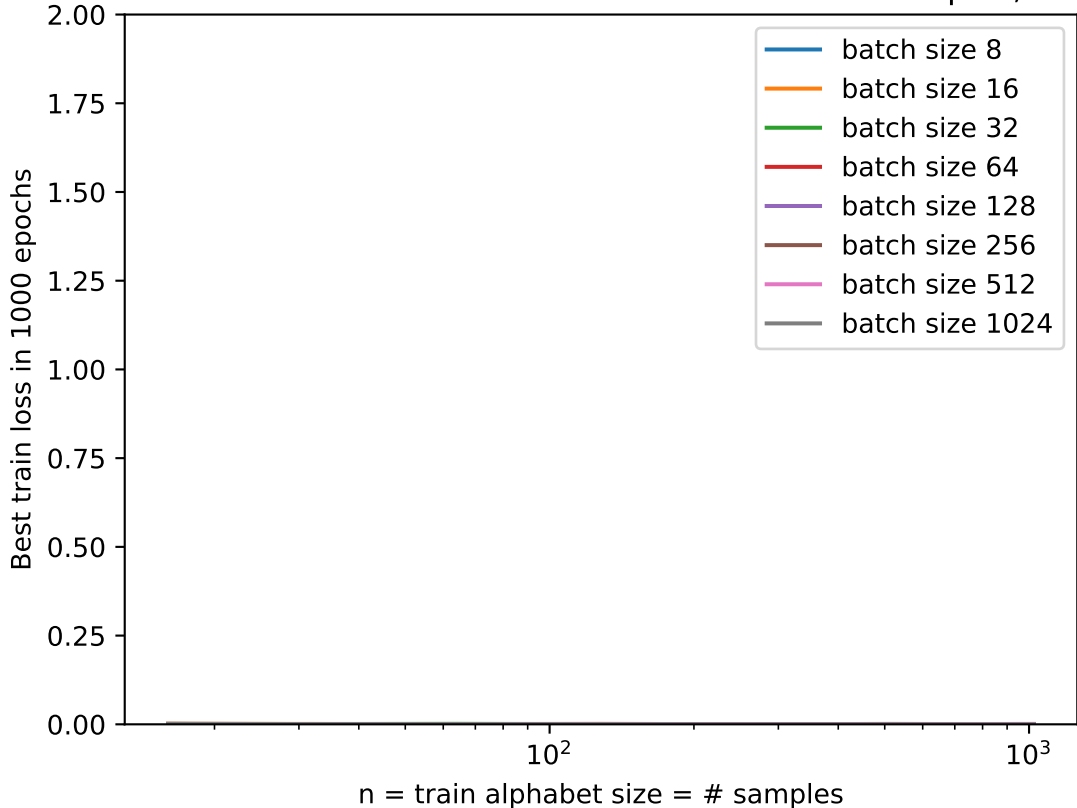

Supplement: supplementary_material [file attachment]

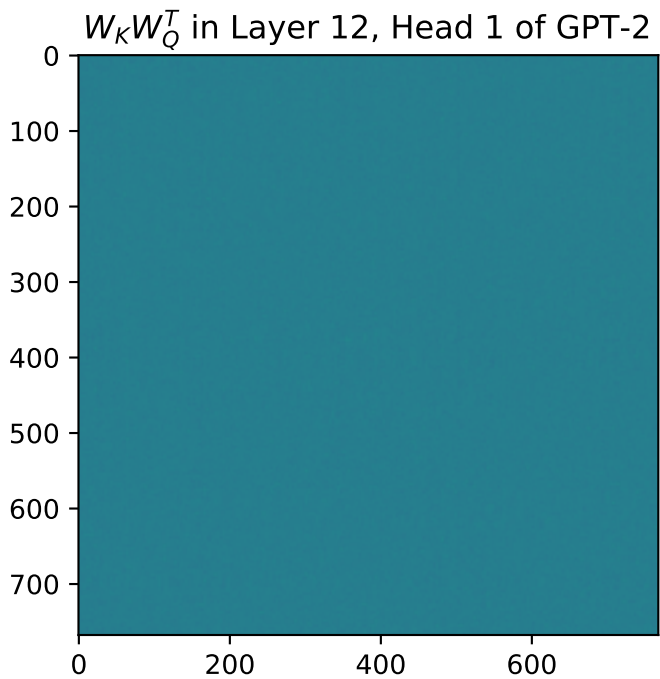

Supplement: supplementary_material [file attachment]

$W_K W_Q^T$  in Layer 4, Head 3 of GPT-2

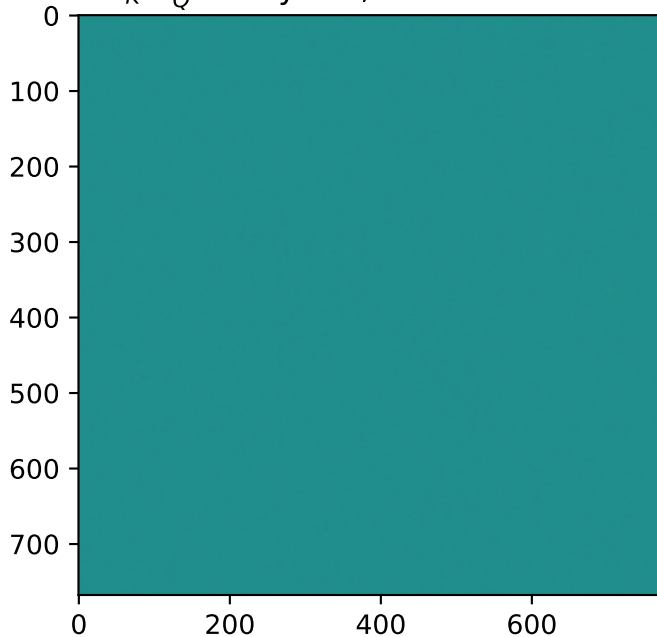

Supplement: supplementary_material [file attachment]

$W_V W_O^T$  in Layer 5, Head 7 of GPT-2

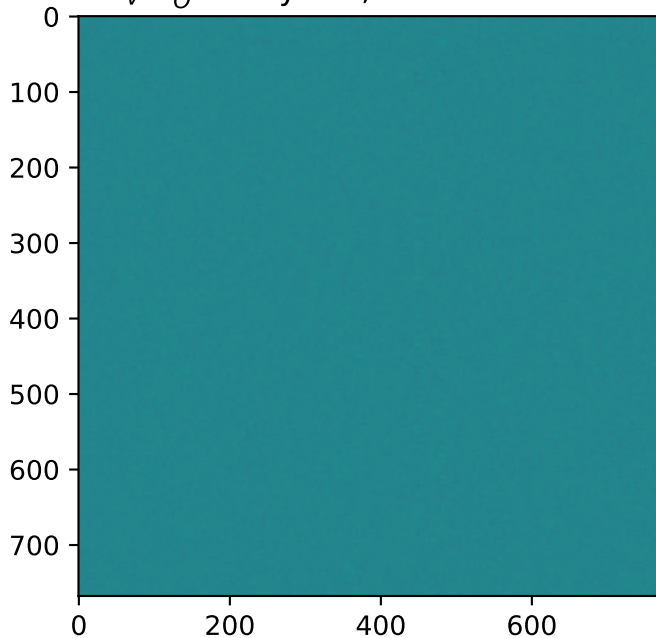

Supplement: supplementary_material [file attachment]

$W_V W_O^T$  in Layer 10, Head 3 of GPT-2

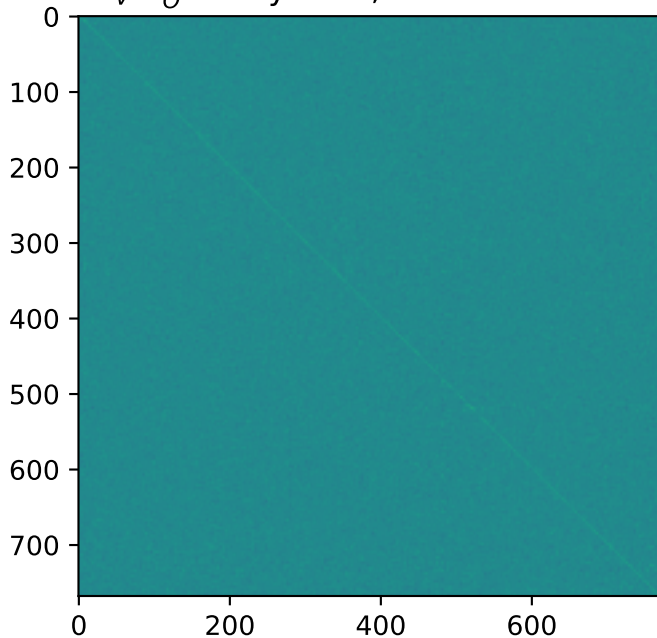

Supplement: supplementary_material [file attachment]

$W_V W_O^T$  in Layer 3, Head 11 of GPT-2

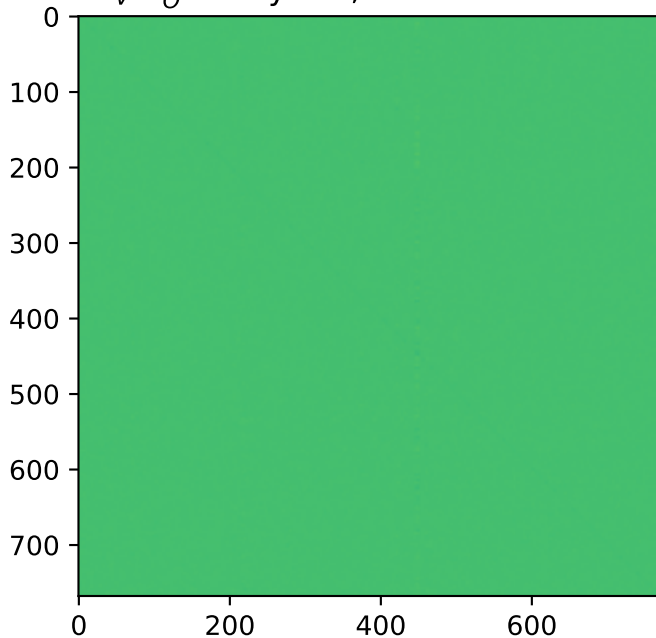

Supplement: supplementary_material [file attachment]

$W_V W_O^T$  in Layer 2, Head 4 of GPT-2

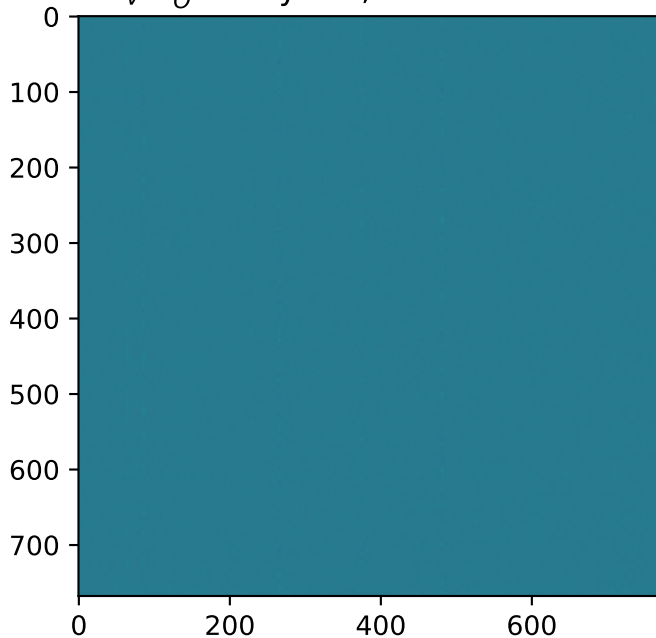

Supplement: supplementary_material [file attachment]

$W_V W_O^T$  in Layer 8, Head 11 of GPT-2

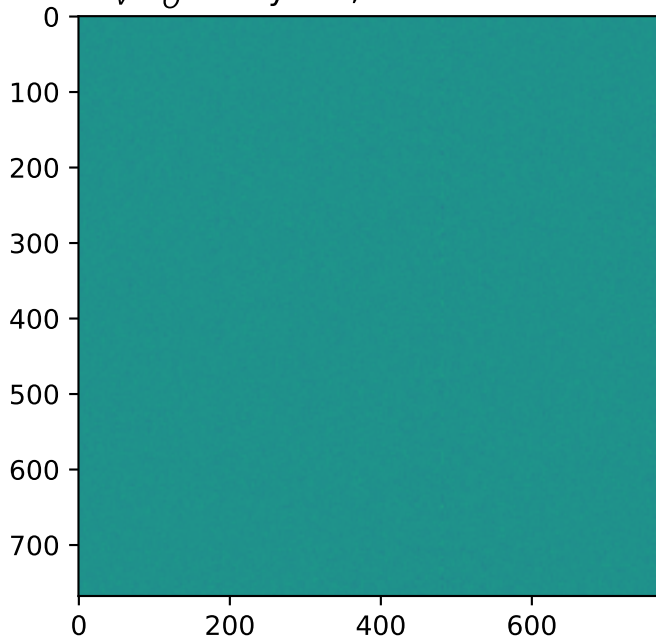

Supplement: supplementary_material [file attachment]
