# Supplementary material (part 4 of 4)
Source: ML conference proceedings conference paper supplement (https://openreview.net/forum?id=STUGfUz8ob)

$W_V W_O^T$  in Layer 1, Head 4 of GPT-2

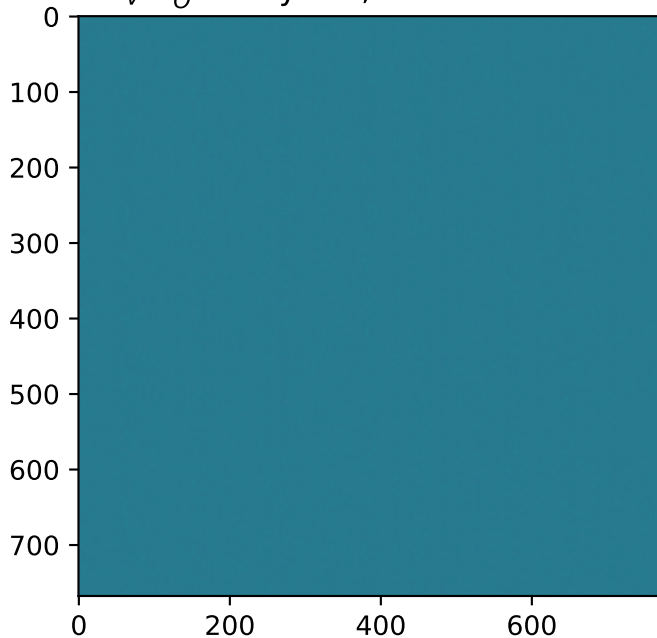

Supplement: supplementary_material [file attachment]

$W_K W_Q^T$  in Layer 4, Head 2 of GPT-2

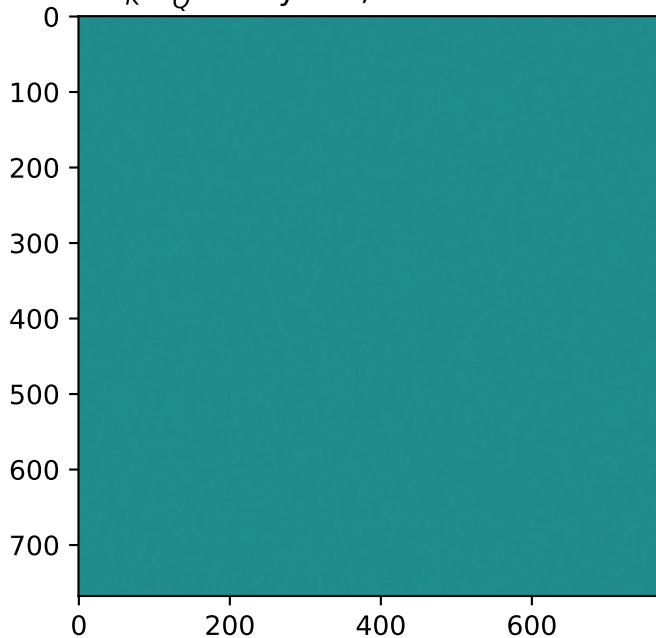

Supplement: supplementary_material [file attachment]

Transformer GOTU vs. learning rate and number of samples

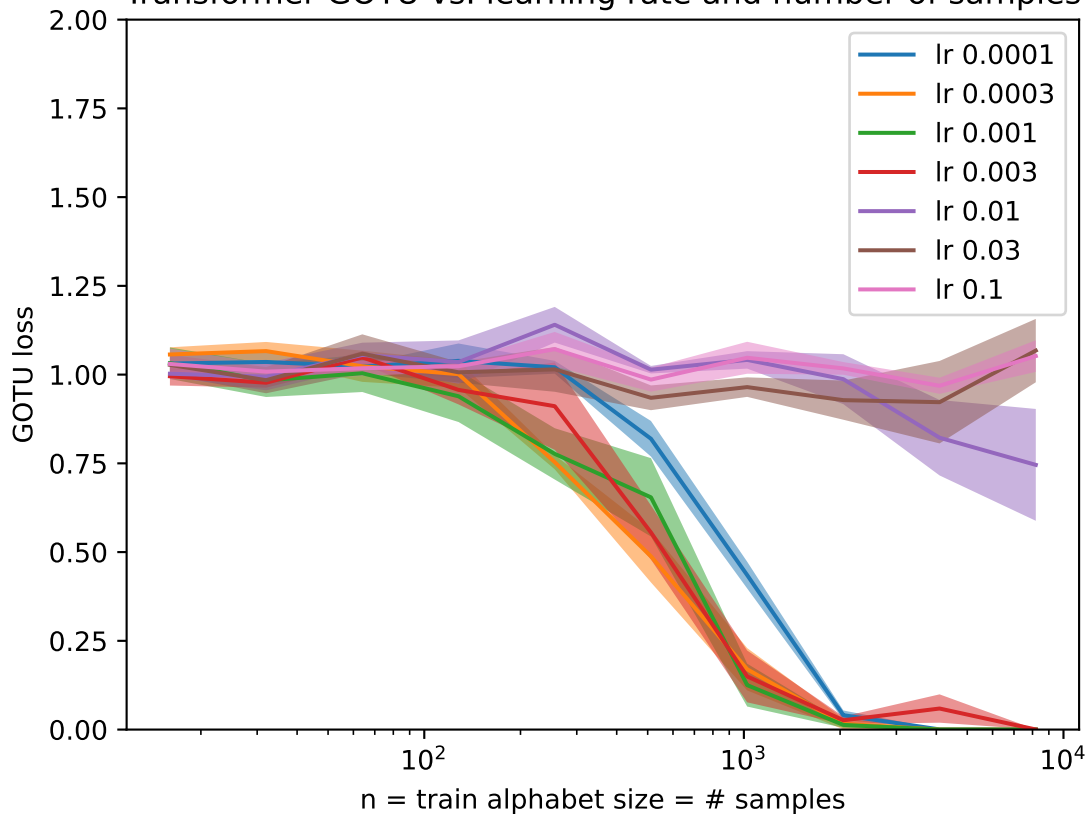

Supplement: supplementary_material [file attachment]

$W_V W_O^T$  in Layer 1, Head 8 of GPT-2

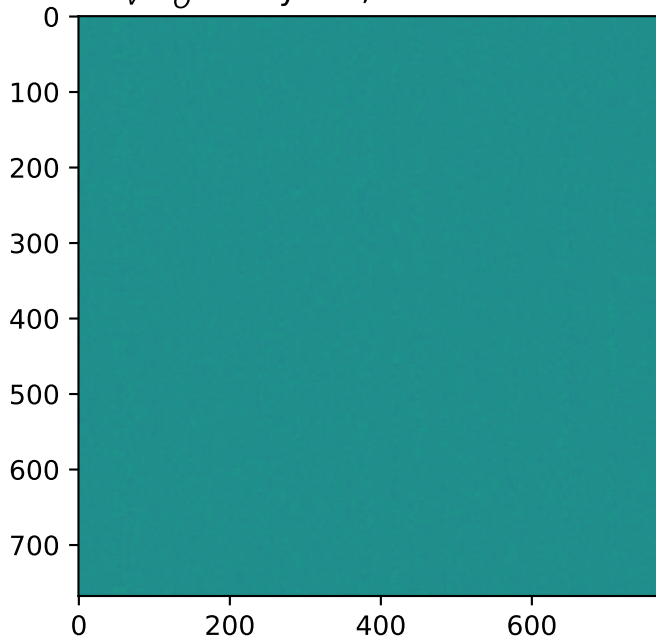

Supplement: supplementary_material [file attachment]

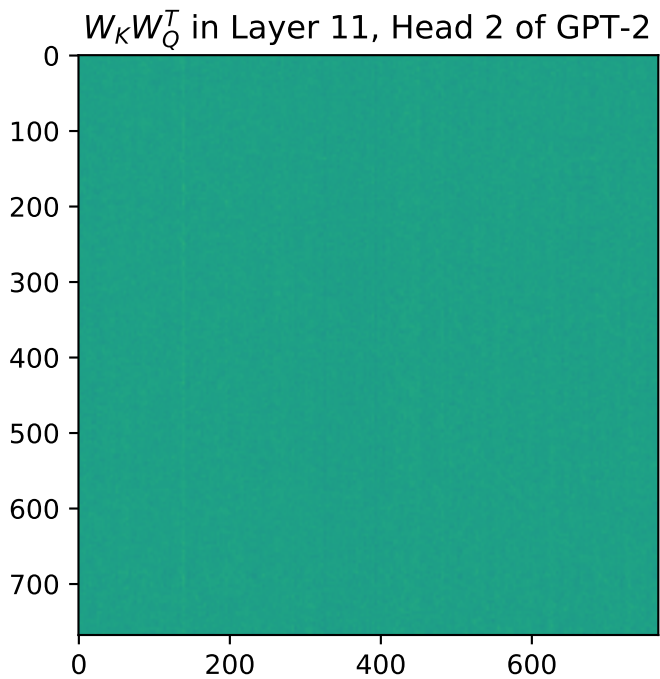

Supplement: supplementary_material [file attachment]

$W_V W_O^T$  in Layer 1, Head 2 of GPT-2

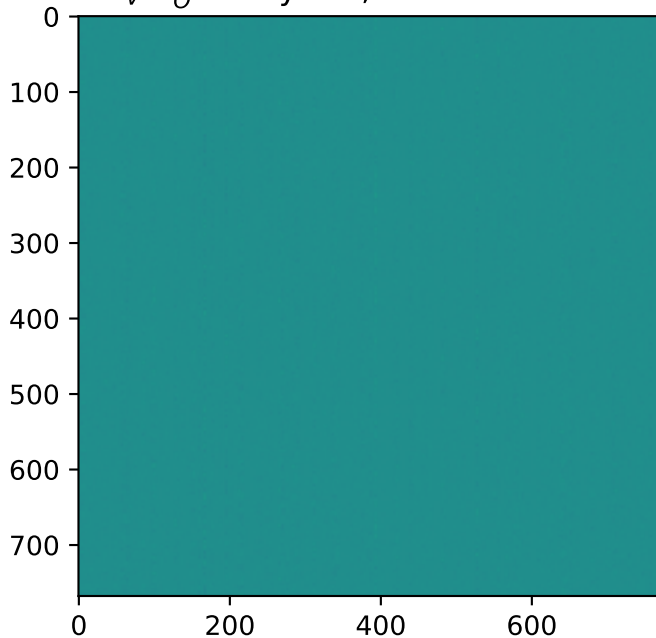

Supplement: supplementary_material [file attachment]

$W_K W_Q^T$  in Layer 12, Head 7 of GPT-2

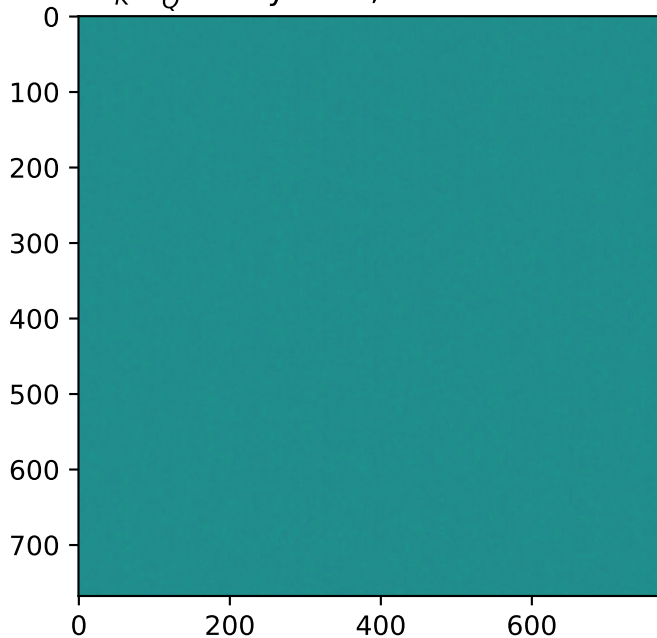

Supplement: supplementary_material [file attachment]

$W_K W_Q^T$  in Layer 9, Head 7 of GPT-2

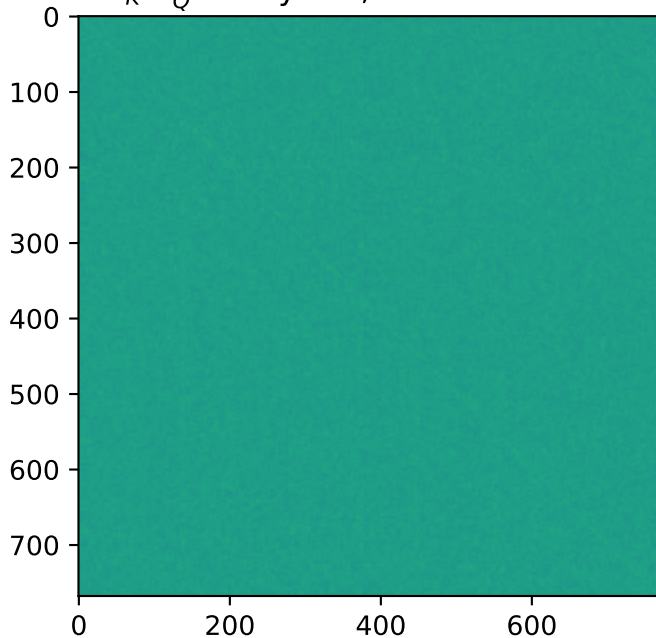

Supplement: supplementary_material [file attachment]

$W_V W_O^T$  in Layer 12, Head 10 of GPT-2

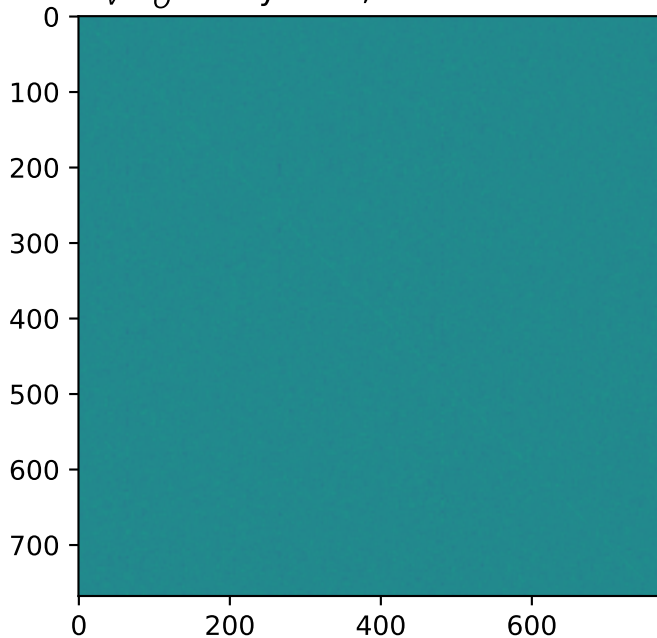

Supplement: supplementary_material [file attachment]

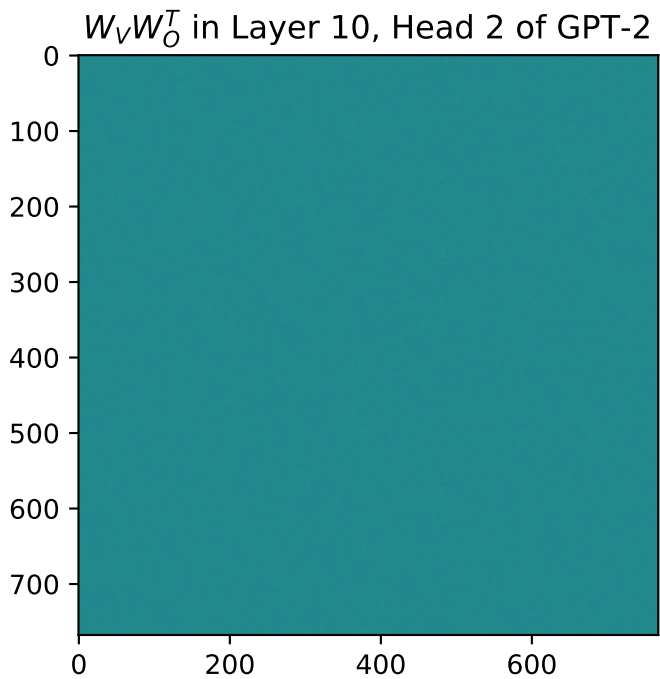

Supplement: supplementary_material [file attachment]

$W_K W_Q^T$  in Layer 2, Head 4 of GPT-2

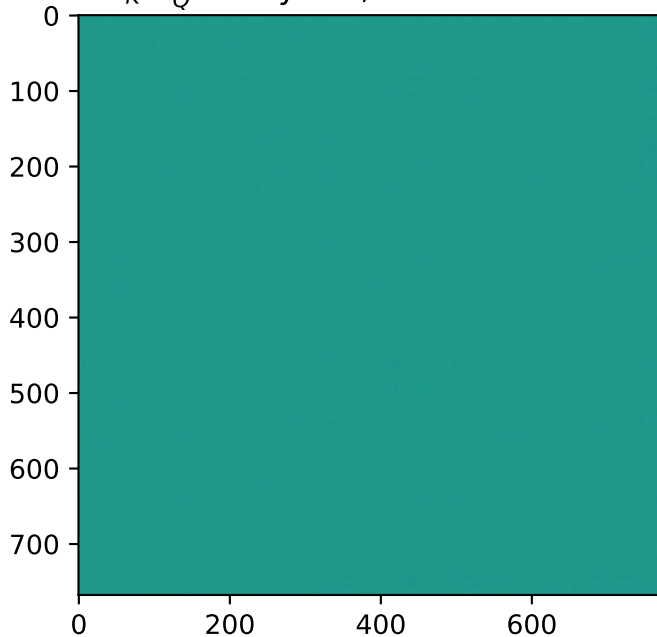

Supplement: supplementary_material [file attachment]

$W_K W_Q^T$  in Layer 1, Head 8 of GPT-2

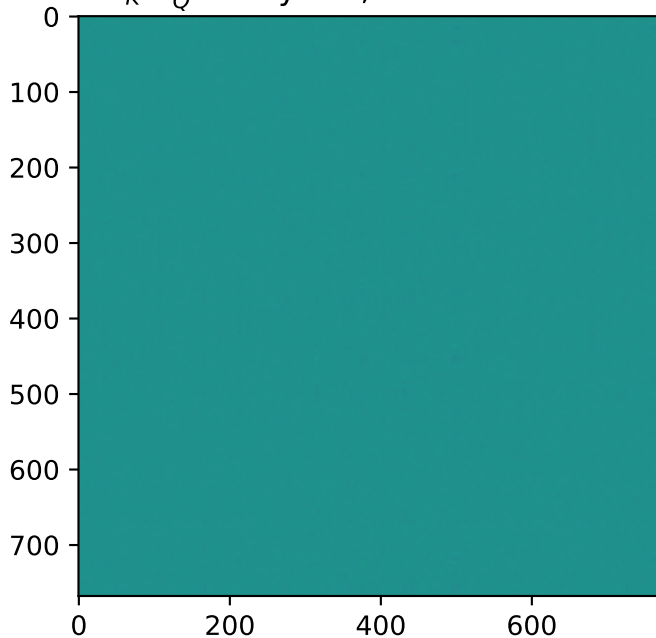

Supplement: supplementary_material [file attachment]

$W_V W_O^T$  in Layer 5, Head 10 of GPT-2

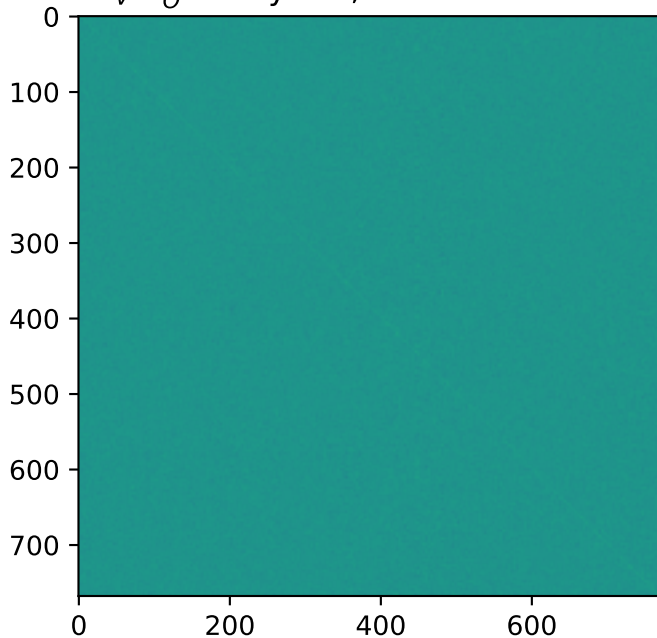

Supplement: supplementary_material [file attachment]

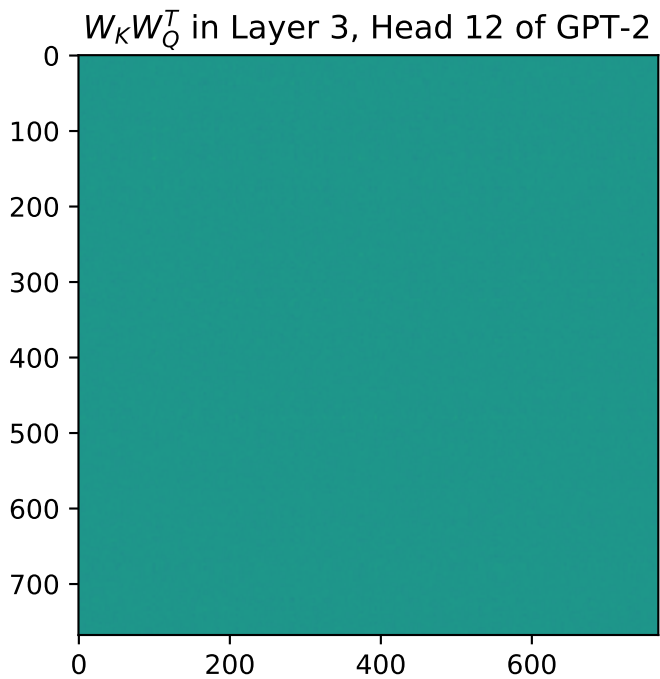

Supplement: supplementary_material [file attachment]

Transformer test loss with Gaussian init vs. mimetic init.

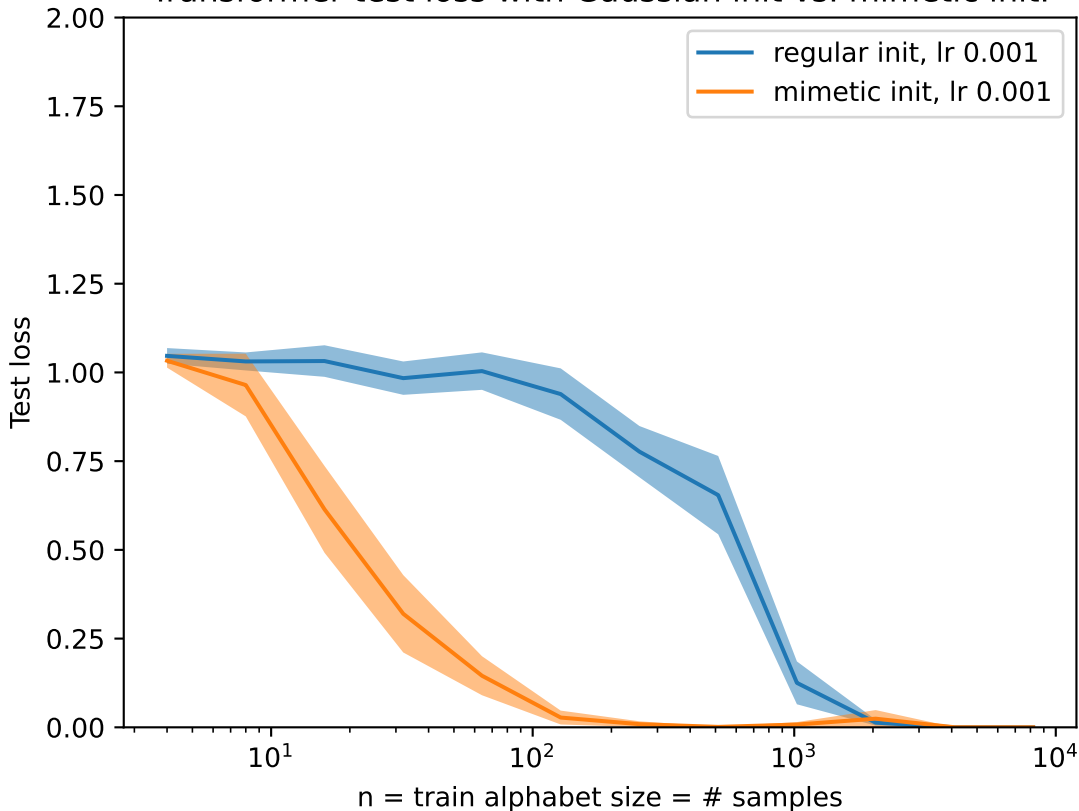

Supplement: supplementary_material [file attachment]

$W_V W_O^T$  in Layer 6, Head 6 of GPT-2

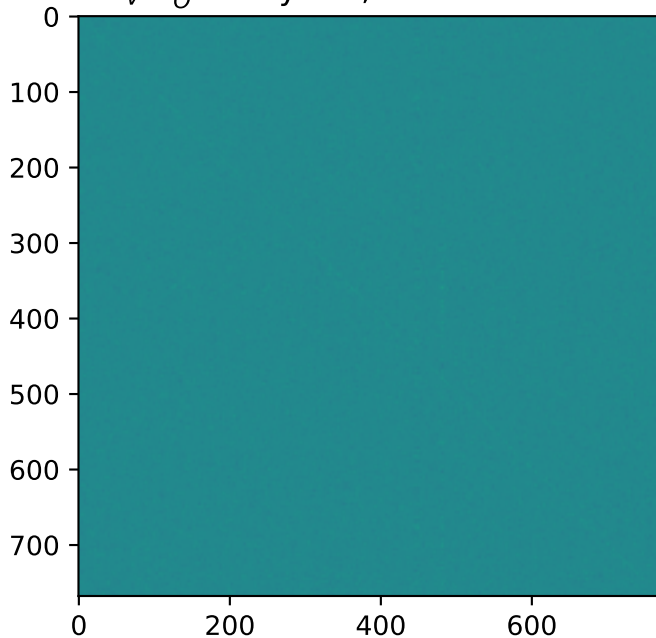

Supplement: supplementary_material [file attachment]

$W_K W_Q^T$  in Layer 8, Head 8 of GPT-2

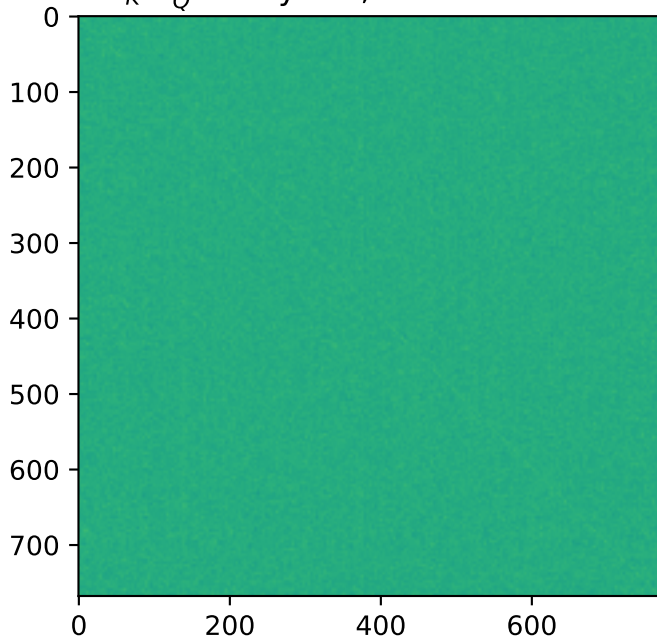

Supplement: supplementary_material [file attachment]

$W_K W_Q^T$  in Layer 1, Head 3 of GPT-2

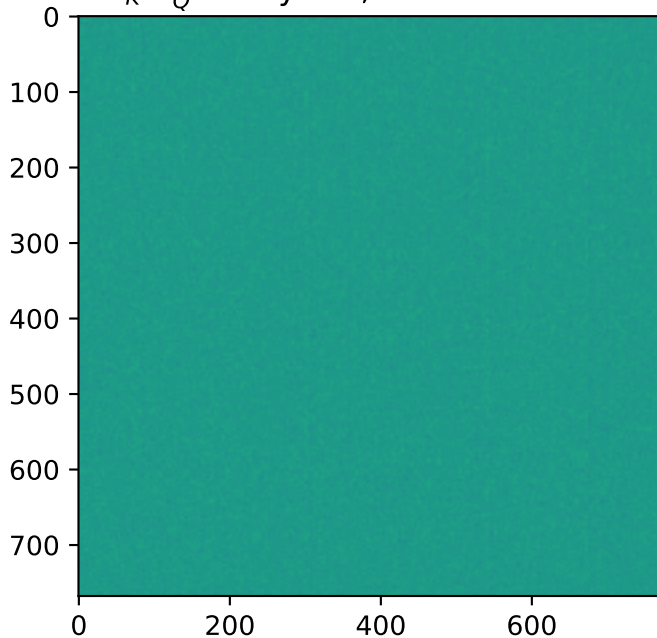

Supplement: supplementary_material [file attachment]

$W_V W_O^T$  in Layer 9, Head 12 of GPT-2

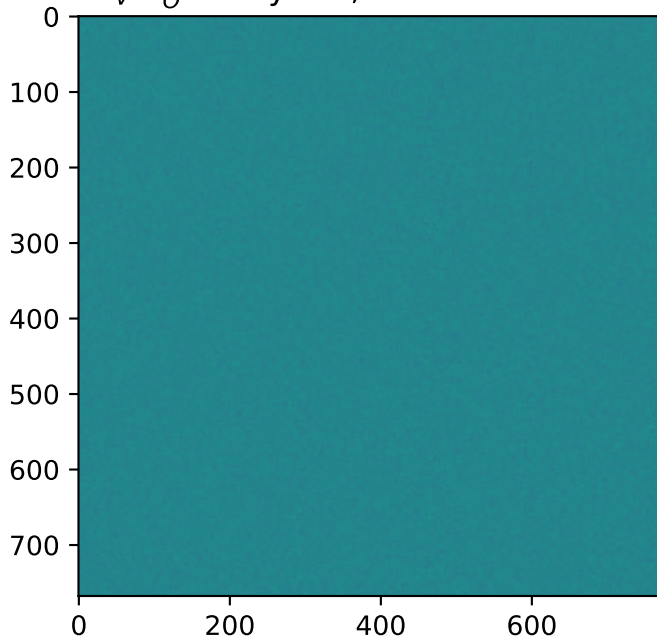

Supplement: supplementary_material [file attachment]

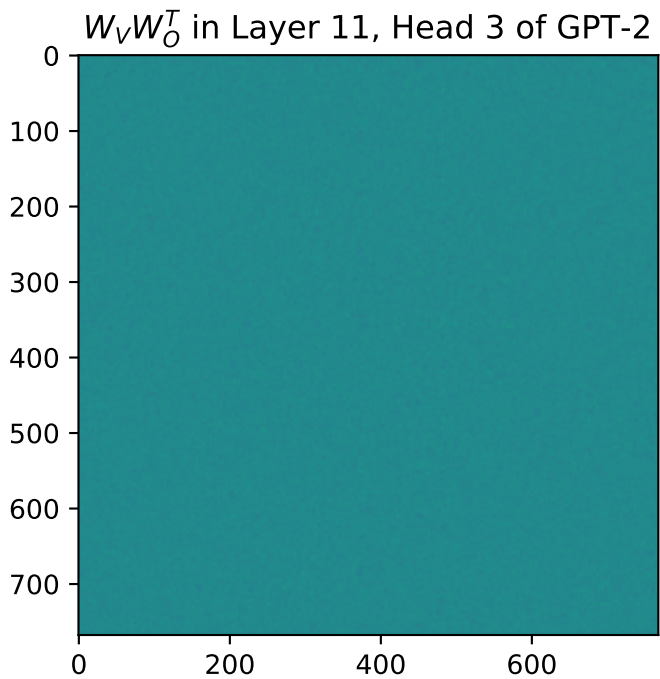

Supplement: supplementary_material [file attachment]

$W_V W_O^T$  in Layer 2, Head 9 of GPT-2

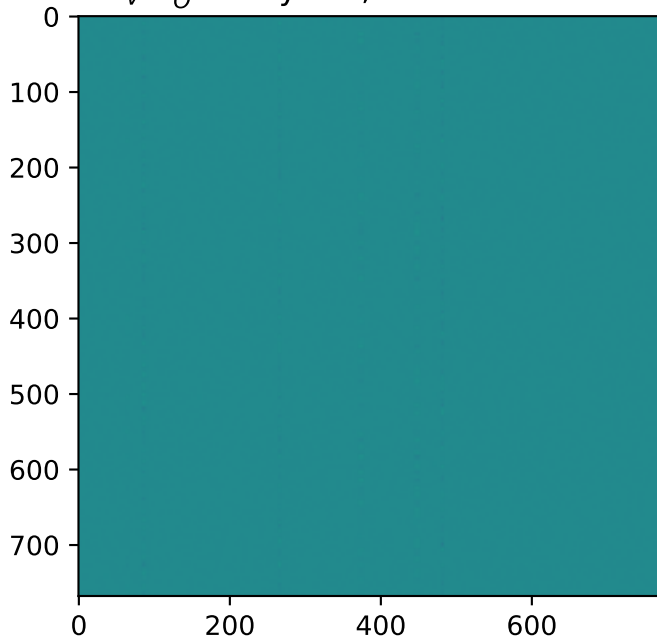

Supplement: supplementary_material [file attachment]

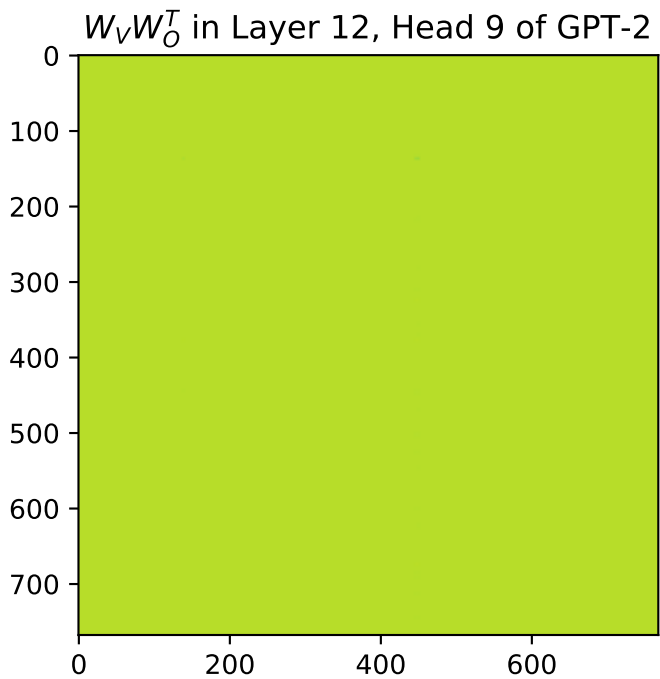

Supplement: supplementary_material [file attachment]

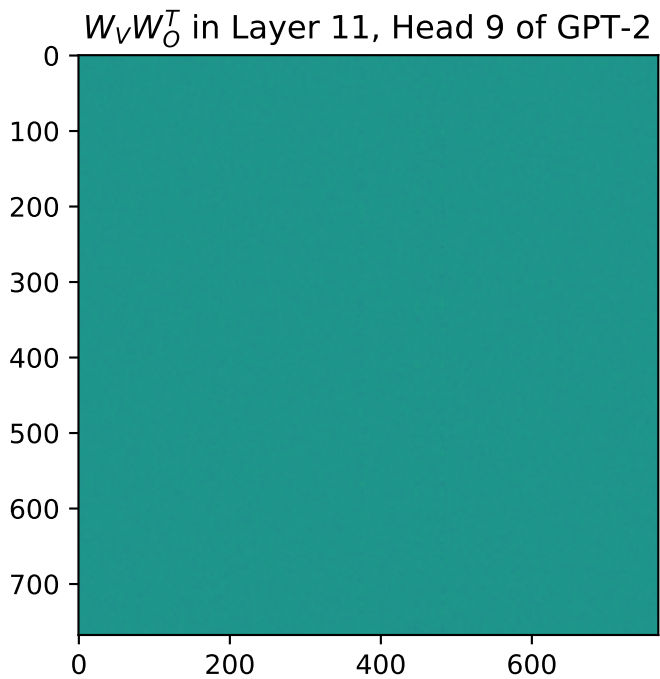

Supplement: supplementary_material [file attachment]

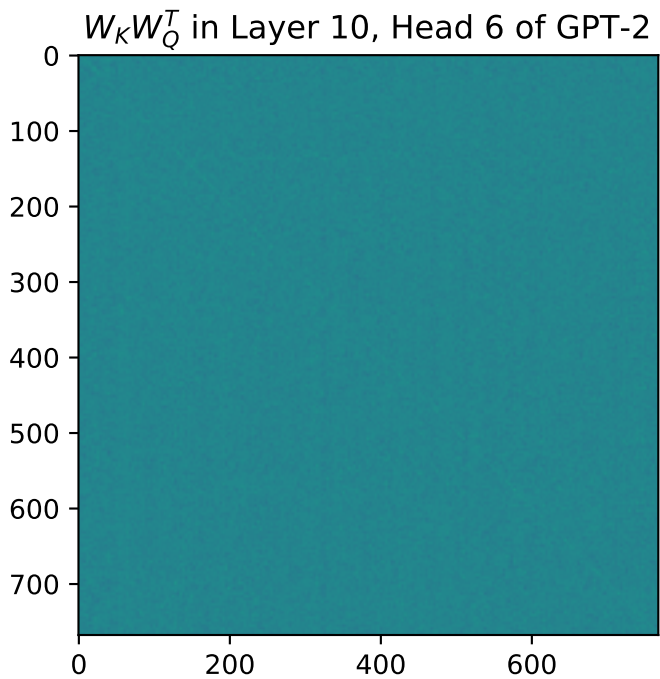

Supplement: supplementary_material [file attachment]

$W_V W_O^T$  in Layer 9, Head 3 of GPT-2

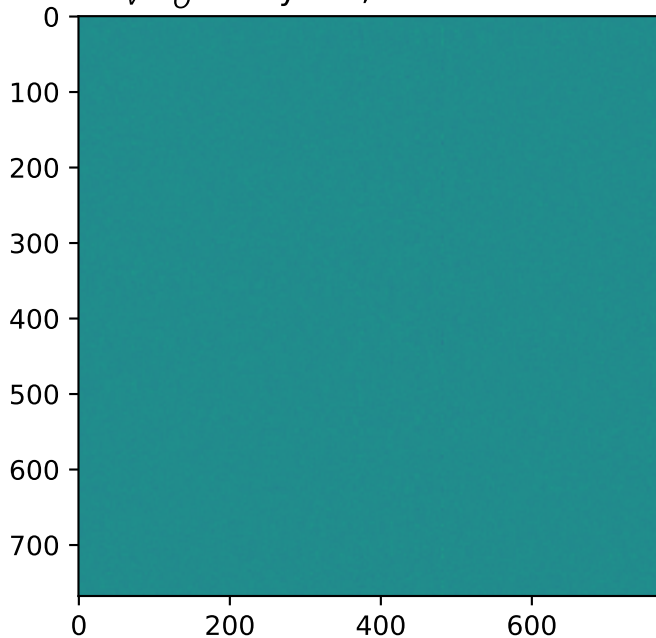

Supplement: supplementary_material [file attachment]

$W_V W_O^T$  in Layer 7, Head 8 of GPT-2

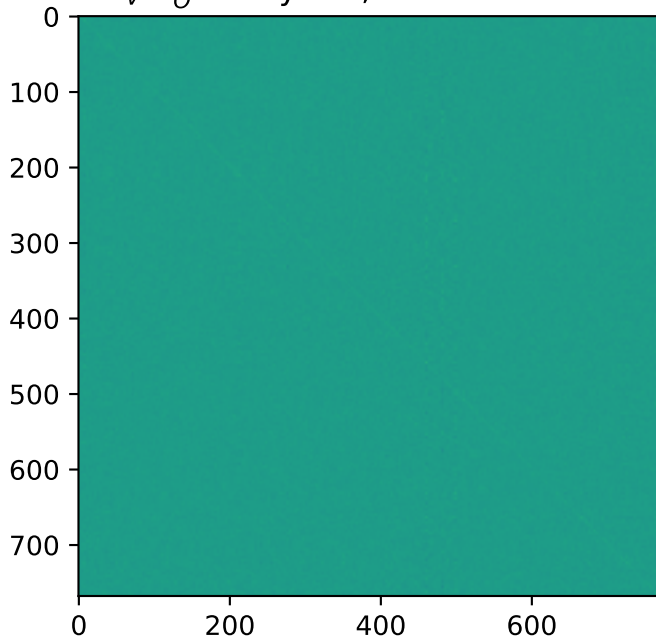

Supplement: supplementary_material [file attachment]

$W_K W_Q^T$  in Layer 9, Head 4 of GPT-2

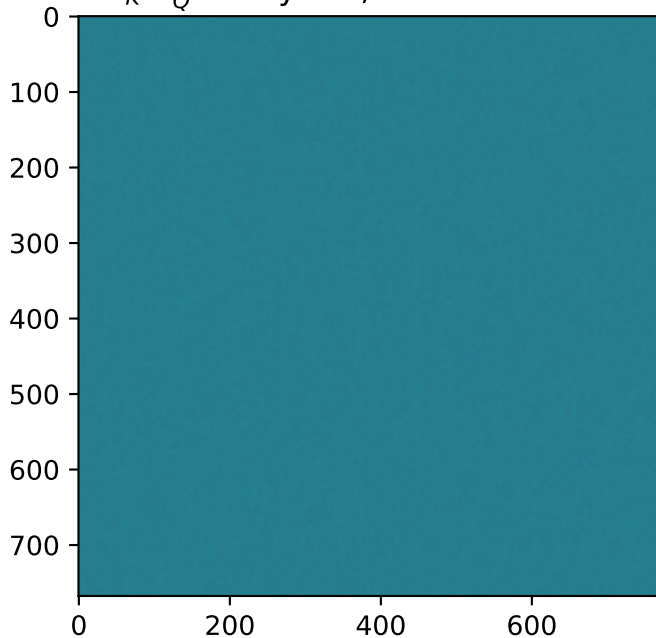

Supplement: supplementary_material [file attachment]

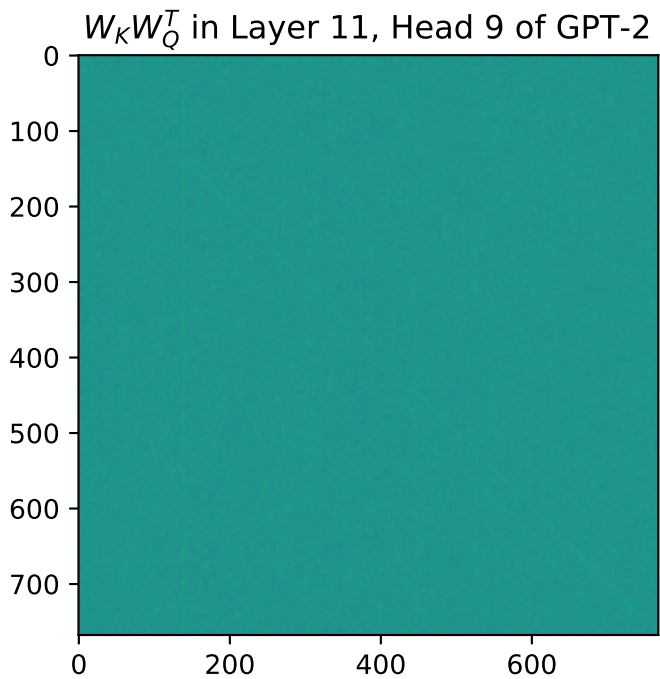

Supplement: supplementary_material [file attachment]

$W_V W_O^T$  in Layer 7, Head 4 of GPT-2

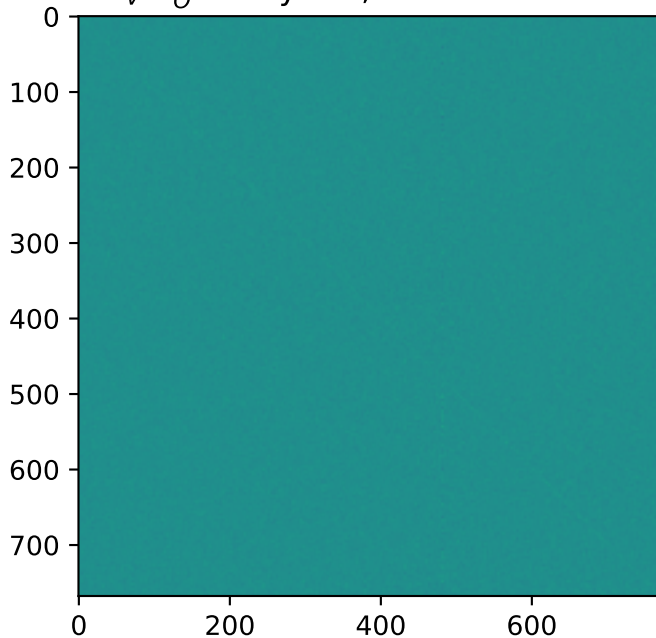

Supplement: supplementary_material [file attachment]

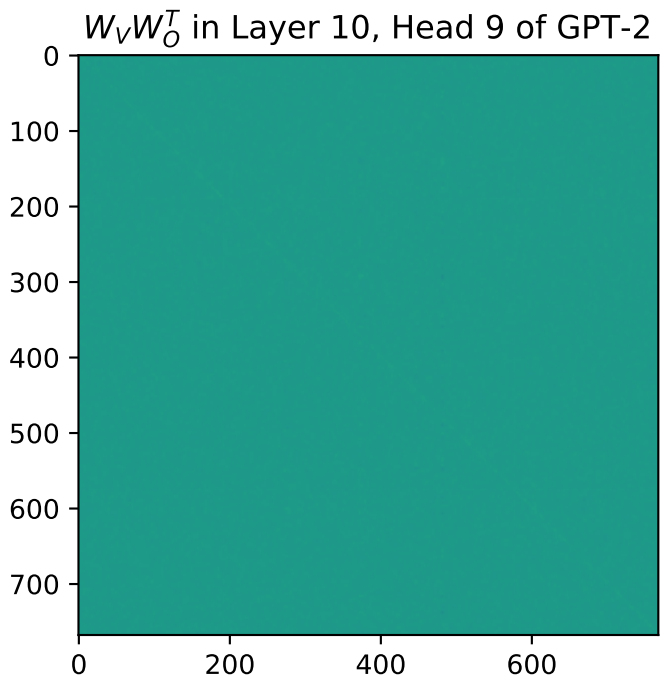

Supplement: supplementary_material [file attachment]

$W_K W_Q^T$  in Layer 12, Head 3 of GPT-2

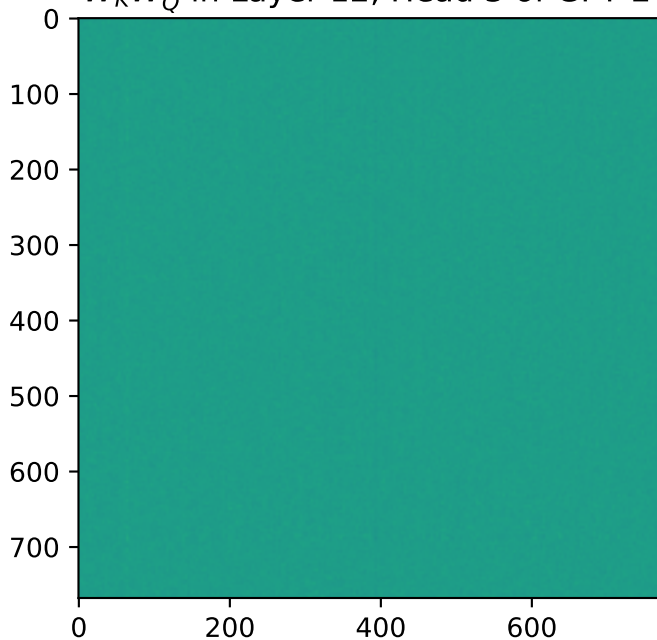

Supplement: supplementary_material [file attachment]

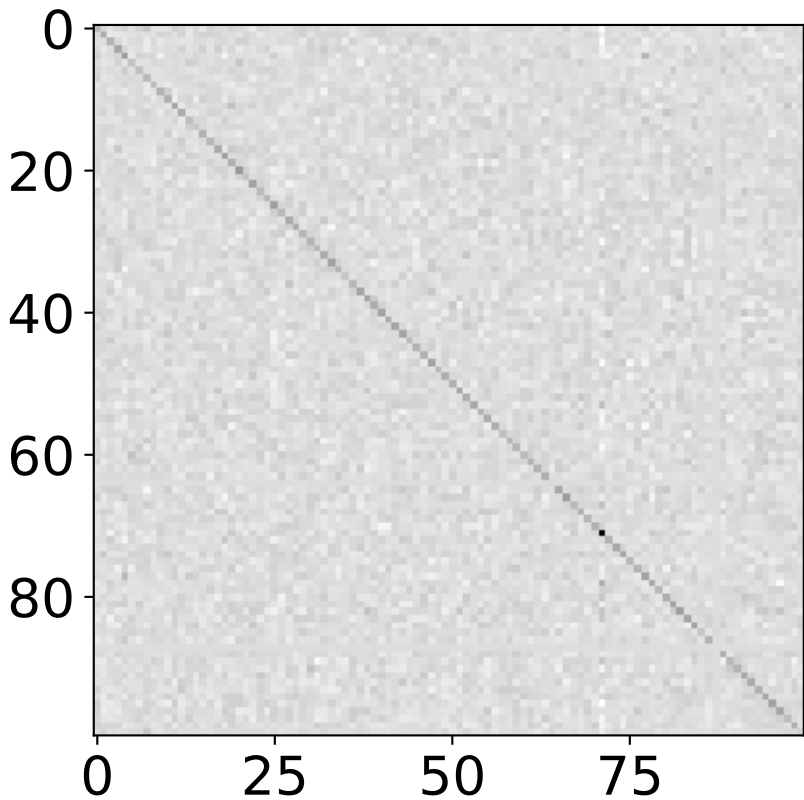

Supplement: supplementary_material [file attachment]

Transformer test loss vs. learning rate and depth, at  $n = 512$

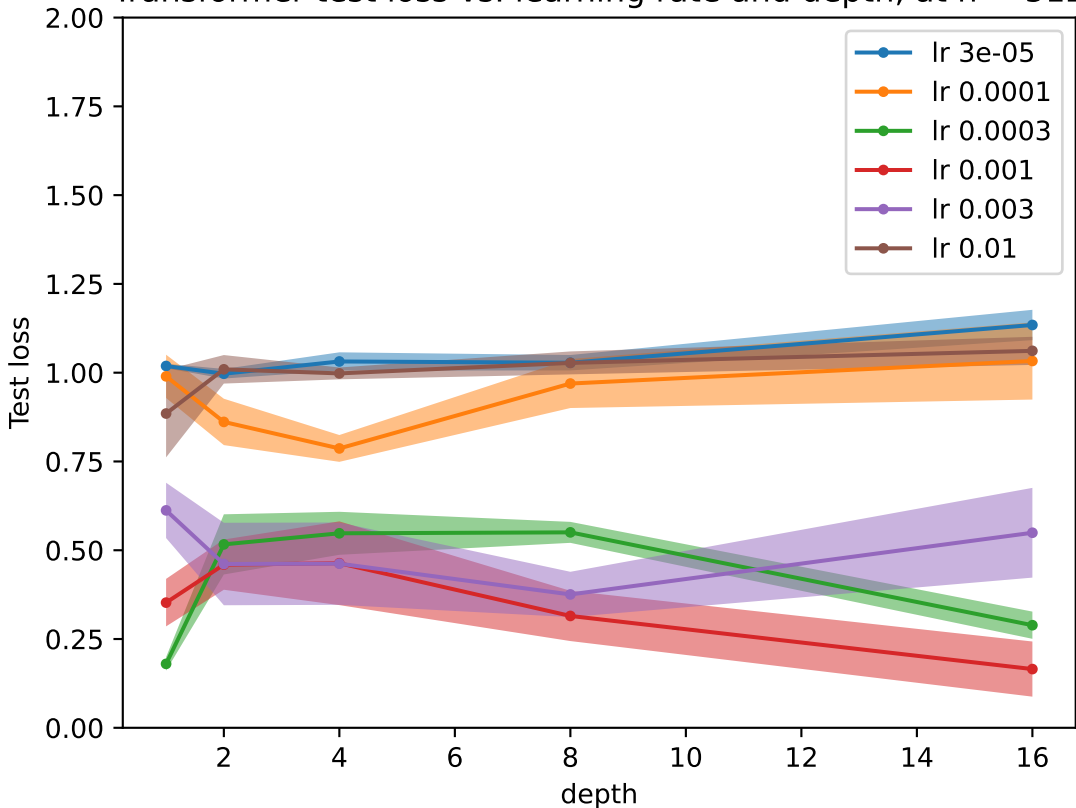

Supplement: supplementary_material [file attachment]

$W_V W_O^T$  in Layer 1, Head 1 of GPT-2

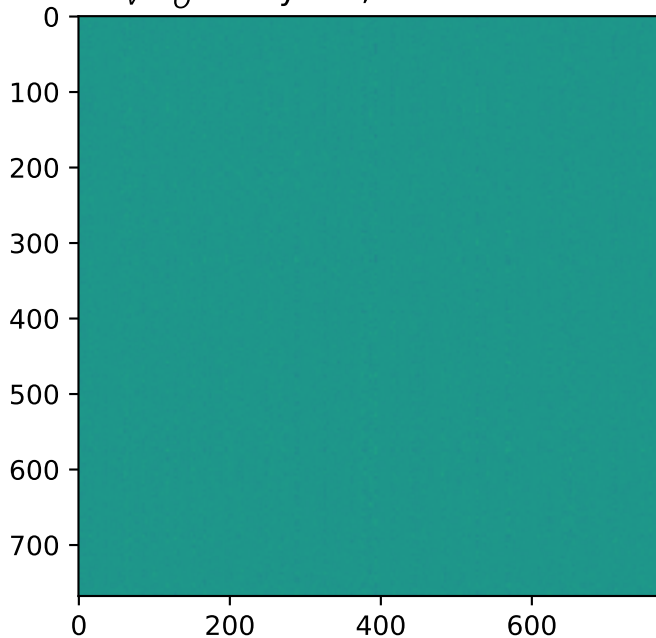

Supplement: supplementary_material [file attachment]

Transformer test loss on random tasks with different wildcard alphabet sizes

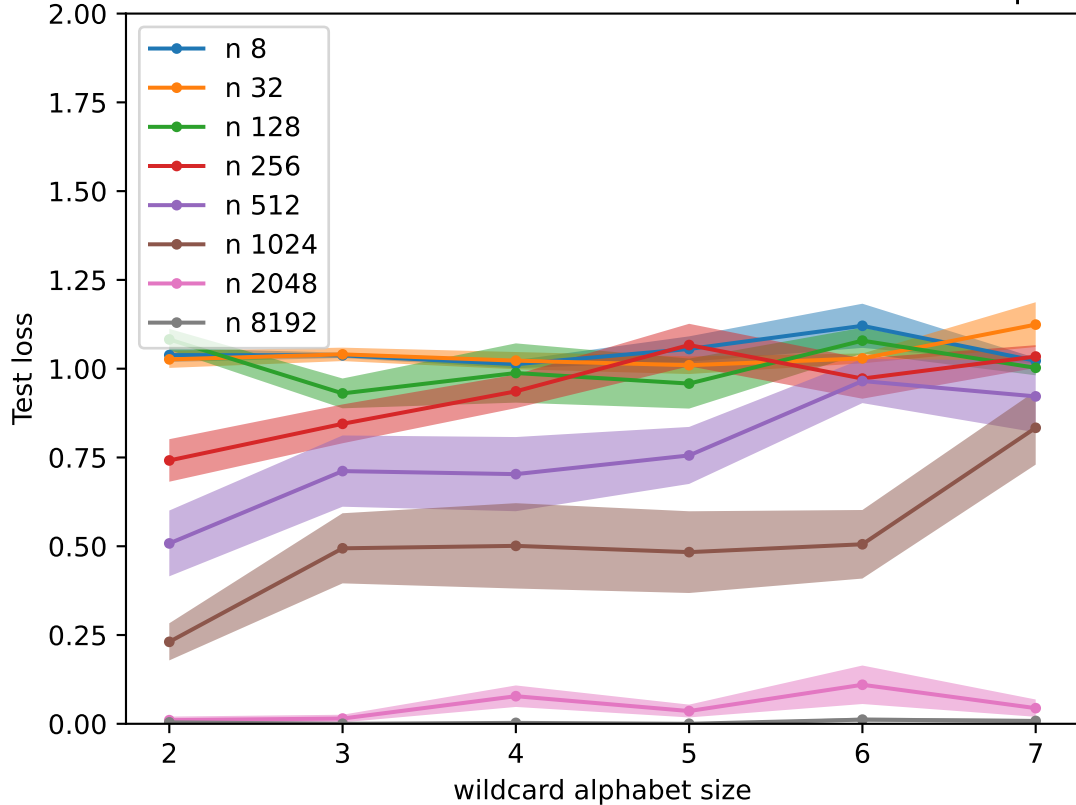

Supplement: supplementary_material [file attachment]
